# Supplementary material for: UV-light induced domino type reactions: synthesis and photophysical properties of unreported nitrogen ring junction quinazolines
Source: Royal Society of Chemistry journal article supplement (doi:10.1039/c5ra00229j), 2015-01-01

Supporting Information

**UV-Light induced Domino type reactions: Synthesis and photo physical properties of unreported nitrogen ring junction triazoloquinazolines**

Jeyakannu Palaniraja and Selvaraj Mohana Roopan\*

Chemistry Research Laboratory, Organic Chemistry Division, School of Advanced Sciences,  
VIT University, Vellore, Tamil Nadu-632014, India. Email: mohanaroopan.s@gmail.com;  
Fax: +91-416-224-3092; Tel: +0416-220-2352.

## Copies of $^1\text{H}$ NMR of 3(a-v)

### $^1\text{H}$ NMR spectrum of compound (3a):

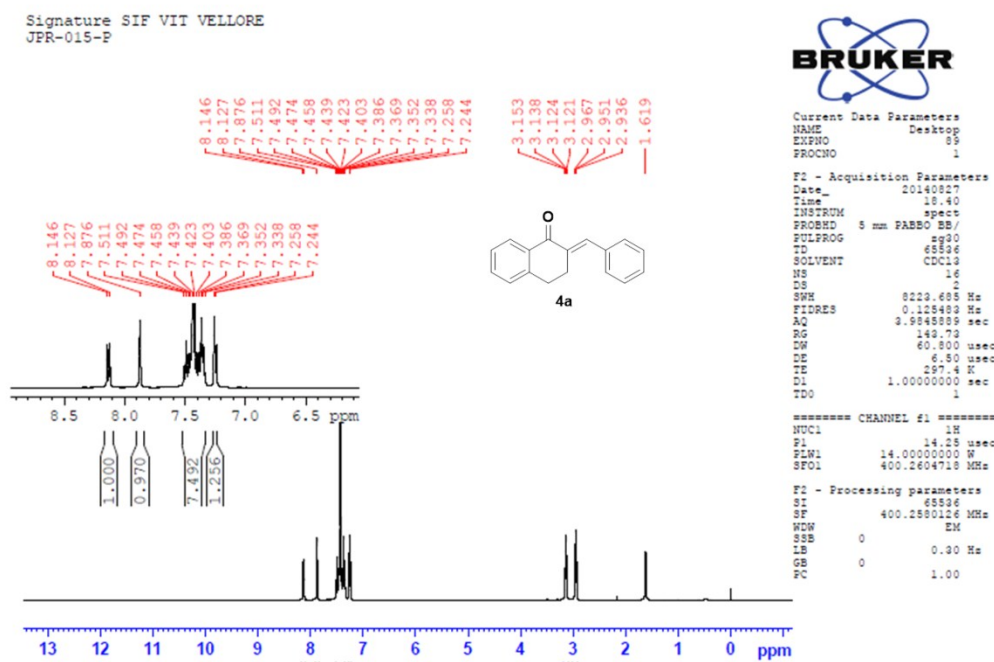

### $^1\text{H}$ NMR spectrum of compound (3b):

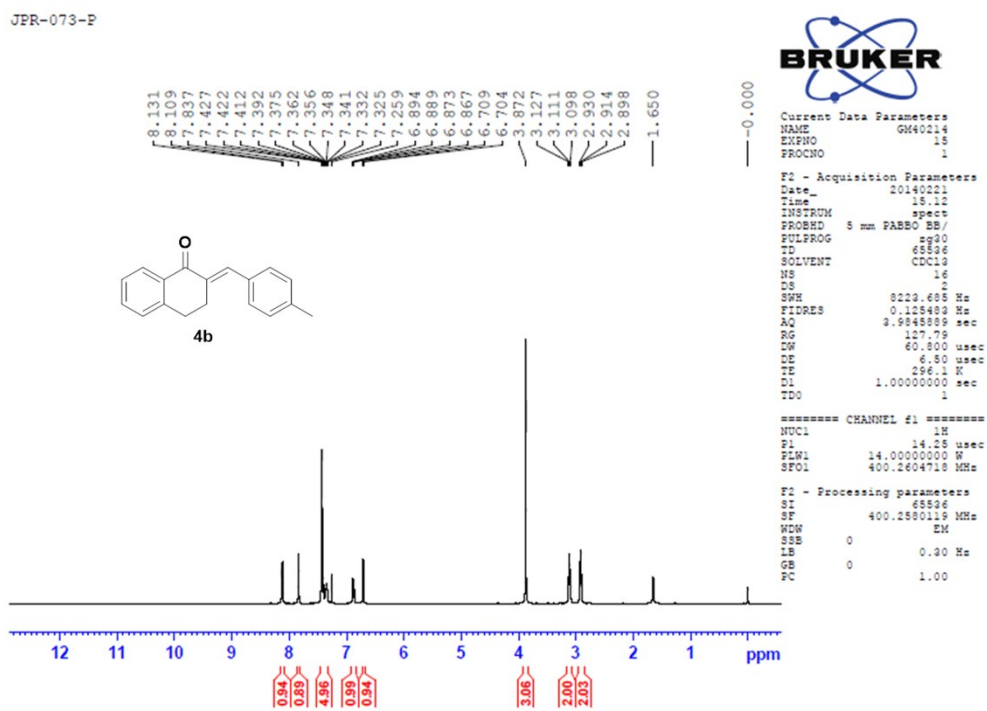

# <sup>1</sup>H NMR spectrum of compound (3c):

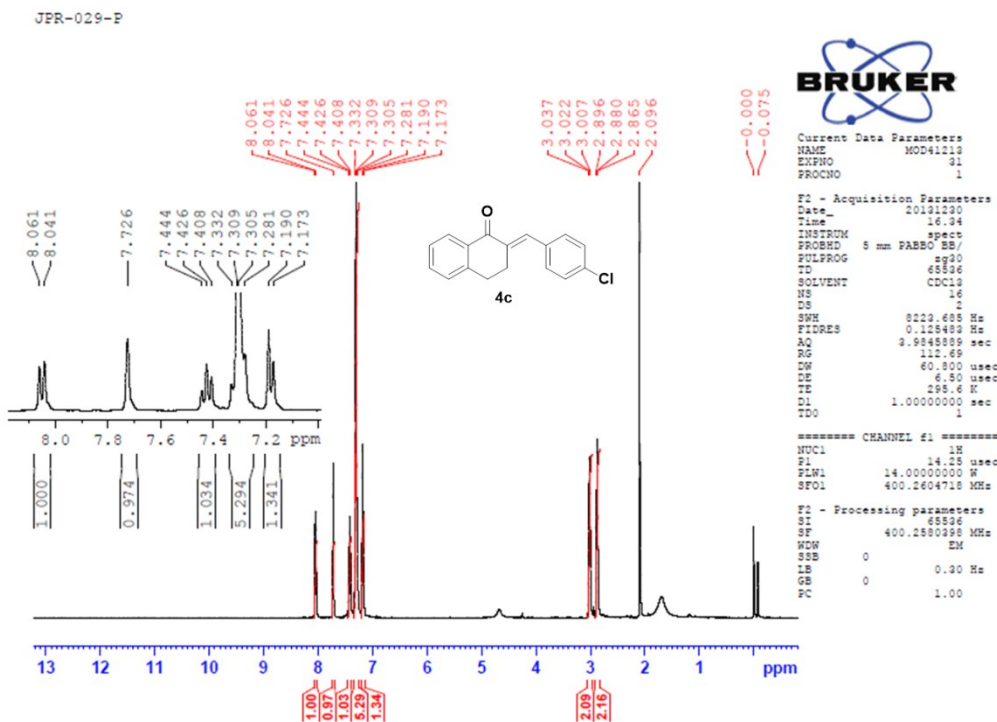

# <sup>1</sup>H NMR spectrum of compound (3d):

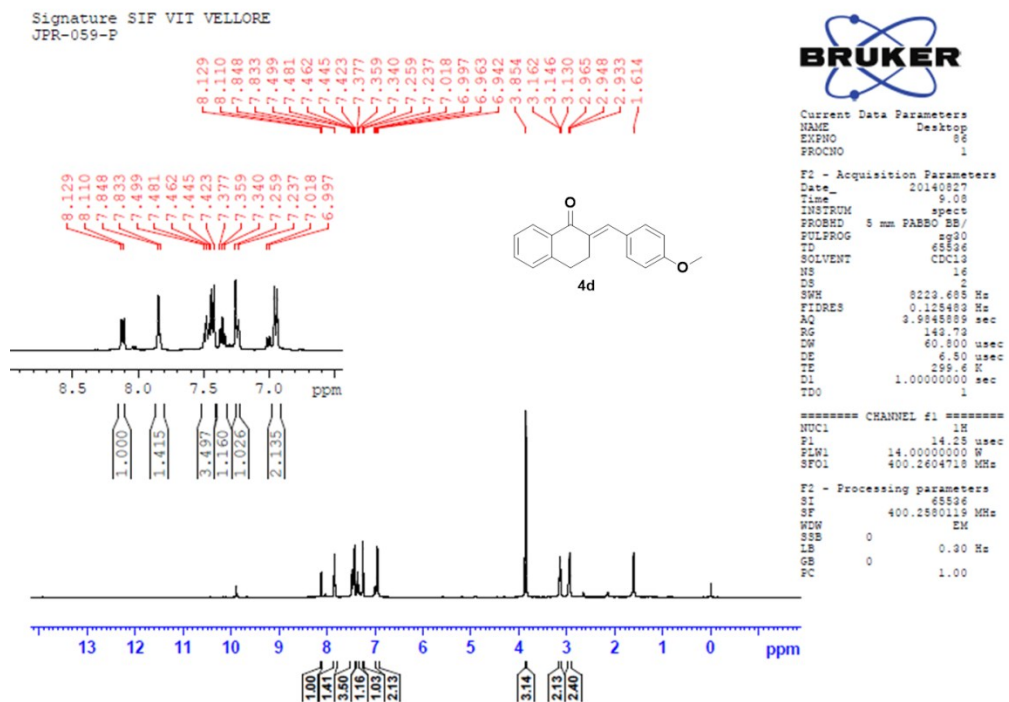

# <sup>1</sup>H NMR spectrum of compound (3e):

Signature SIF VIT VELLORE  
JPR-101-P

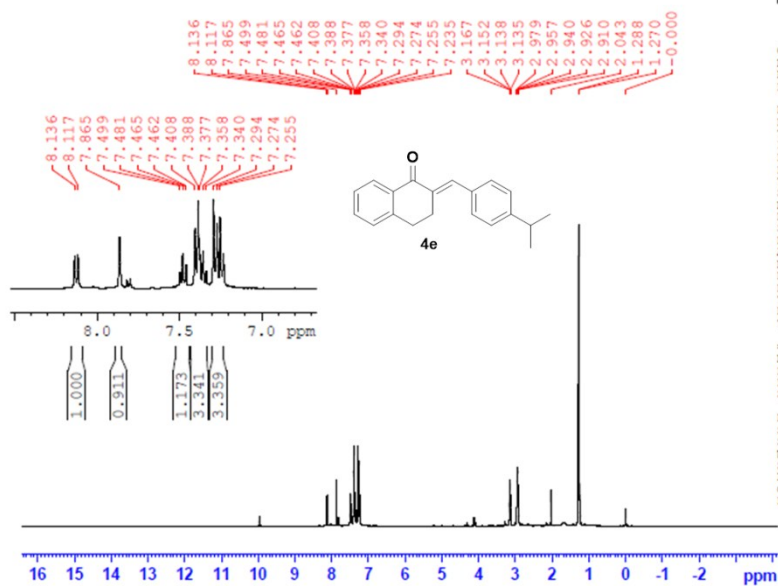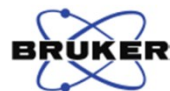

Current Data Parameters  
NAME Desktop  
EXPNO 47  
PROCNO 1

F2 - Acquisition Parameters  
Date\_ 20140819  
Time 12.46  
INSTRUM spect  
PROBHD 5 mm FAPBO BB/  
PULPROG zg30  
TD 65536  
SOLVENT CDCl3  
NS 16  
DS 2  
SWH 8223.685 Hz  
FIDRES 0.125489 Hz  
AQ 3.9545889 sec  
RG 96.88  
DW 60.800 usec  
DE 6.50 usec  
TE 296.2 K  
DL 1.0000000 sec  
TDO 1

===== CHANNEL f1 =====  
NUC1 1H  
P1 14.25 usec  
PLW1 14.0000000 W  
SF01 400.2604718 MHz

F2 - Processing parameters  
SI 65536  
SF 400.2604718 MHz  
WDW EM  
SSB 0  
LB 0.30 Hz  
GB 0  
PC 1.00

# <sup>1</sup>H NMR spectrum of compound (3f):

Signature SIF VIT VELLORE  
JPR-126-P

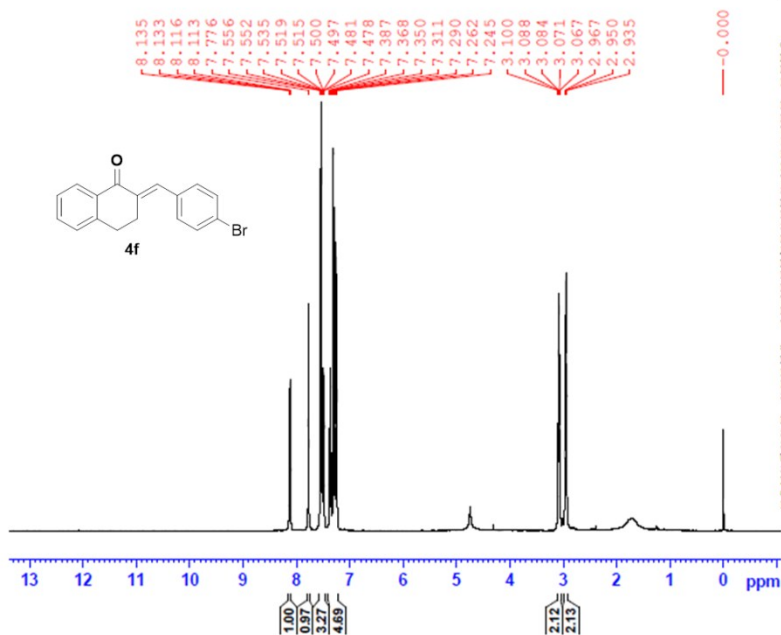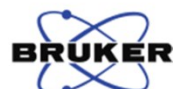

Current Data Parameters  
NAME 125  
EXPNO 9  
PROCNO 1

F2 - Acquisition Parameters  
Date\_ 20140610  
Time 14.57  
INSTRUM spect  
PROBHD 5 mm FAPBO BB/  
PULPROG zg30  
TD 65536  
SOLVENT CDCl3  
NS 16  
DS 2  
SWH 8223.685 Hz  
FIDRES 0.125489 Hz  
AQ 3.9545889 sec  
RG 96.88  
DW 60.800 usec  
DE 6.50 usec  
TE 296.1 K  
DL 1.0000000 sec  
TDO 1

===== CHANNEL f1 =====  
NUC1 1H  
P1 14.25 usec  
PLW1 14.0000000 W  
SF01 400.2604718 MHz

F2 - Processing parameters  
SI 65536  
SF 400.2604718 MHz  
WDW EM  
SSB 0  
LB 0.30 Hz  
GB 0  
PC 1.00

# <sup>1</sup>H NMR spectrum of compound (3g):

Signature SIF VIT VELLORE  
JPR-122-P

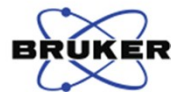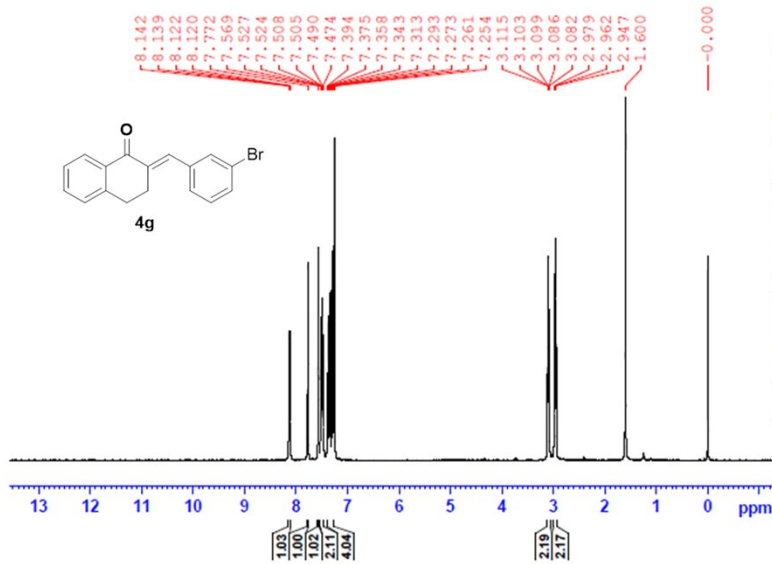

Current Data Parameters  
NAME analy  
EXPNO 3  
PROCNO 1

F2 - Acquisition Parameters  
Date\_ 20140609  
Time 17.34  
INSTRUM spect  
PROBHD 5 mm FAPBBO BB/  
PULPROG zg30  
TD 65536  
SOLVENT CDCl3  
NS 16  
DS 2  
SWH 8223.655 Hz  
FIDRES 0.125493 Hz  
AQ 2.984889 sec  
RG 156.91  
DW 60.800 usec  
DE 6.30 usec  
TE 295.8 K  
DL 1.0000000 sec  
TDO 1

===== CHANNEL f1 =====  
NUC1 1H  
P1 14.25 usec  
PLW1 14.0000000 W  
SFO1 400.2604718 MHz

F2 - Processing parameters  
SI 65536  
SF 400.260110 MHz  
WDW EM  
SSB 0  
LB 0.30 Hz  
GB 0  
PC 1.00

# <sup>1</sup>H NMR spectrum of compound (3h):

Signature SIF VIT VELLORE  
JPR-133-P

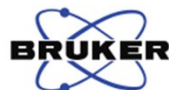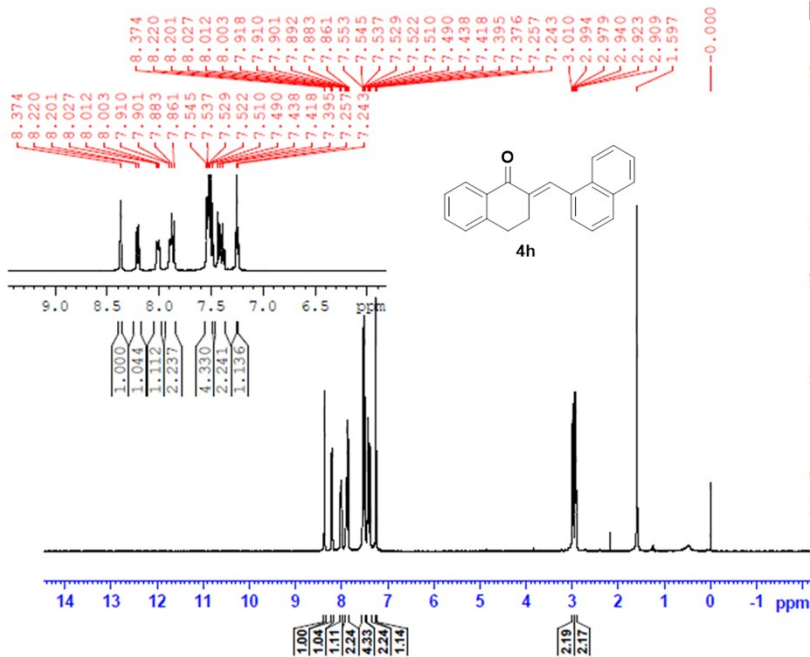

Current Data Parameters  
NAME Destrop  
EXPNO 98  
PROCNO 1

F2 - Acquisition Parameters  
Date\_ 20140827  
Time 18.26  
INSTRUM spect  
PROBHD 5 mm FAPBBO BB/  
PULPROG zg30  
TD 65536  
SOLVENT CDCl3  
NS 16  
DS 2  
SWH 8223.655 Hz  
FIDRES 0.125493 Hz  
AQ 2.984889 sec  
RG 156.91  
DW 60.800 usec  
DE 6.30 usec  
TE 297.8 K  
DL 1.0000000 sec  
TDO 1

===== CHANNEL f1 =====  
NUC1 1H  
P1 14.25 usec  
PLW1 14.0000000 W  
SFO1 400.2604718 MHz

F2 - Processing parameters  
SI 65536  
SF 400.260110 MHz  
WDW EM  
SSB 0  
LB 0.30 Hz  
GB 0  
PC 1.00

### <sup>1</sup>H NMR spectrum of compound (3i):

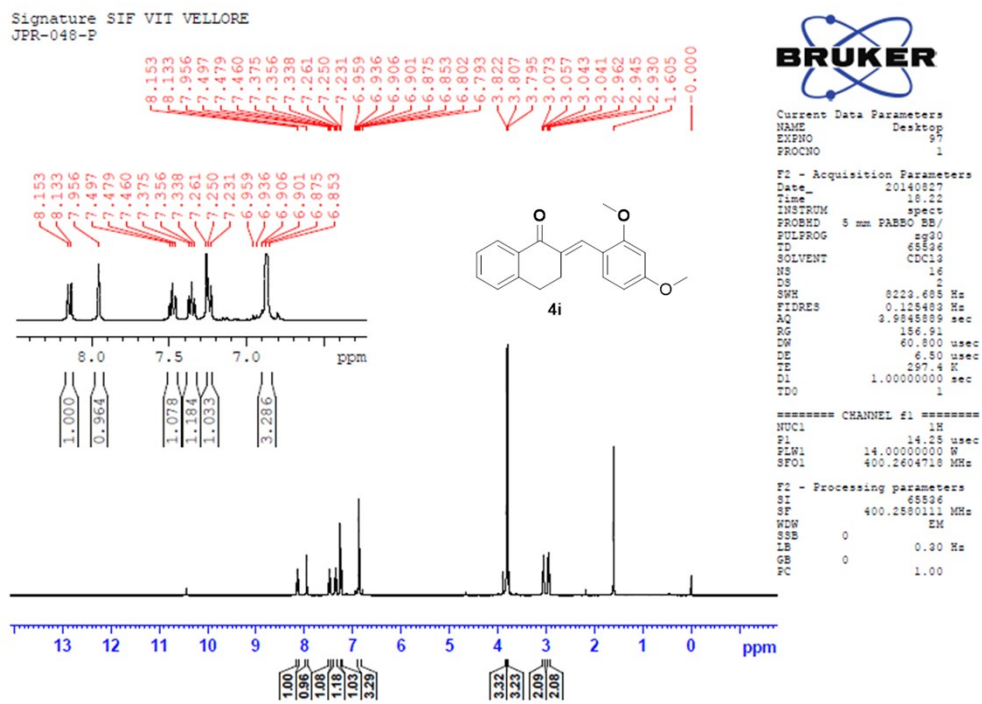

### <sup>1</sup>H NMR spectrum of compound (3k):

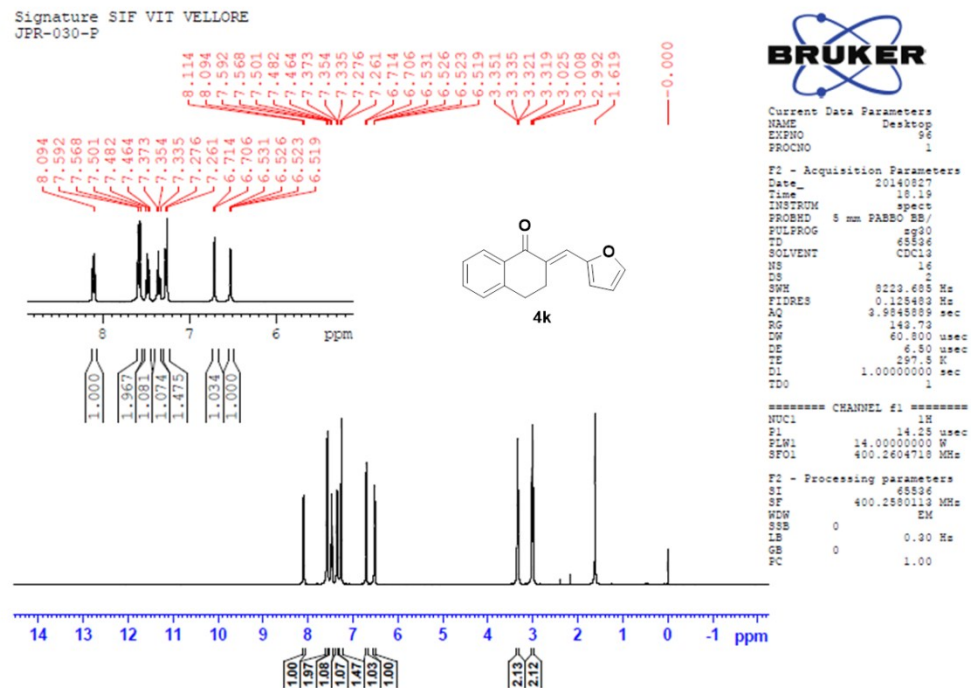

# <sup>1</sup>H NMR spectrum of compound (3l):

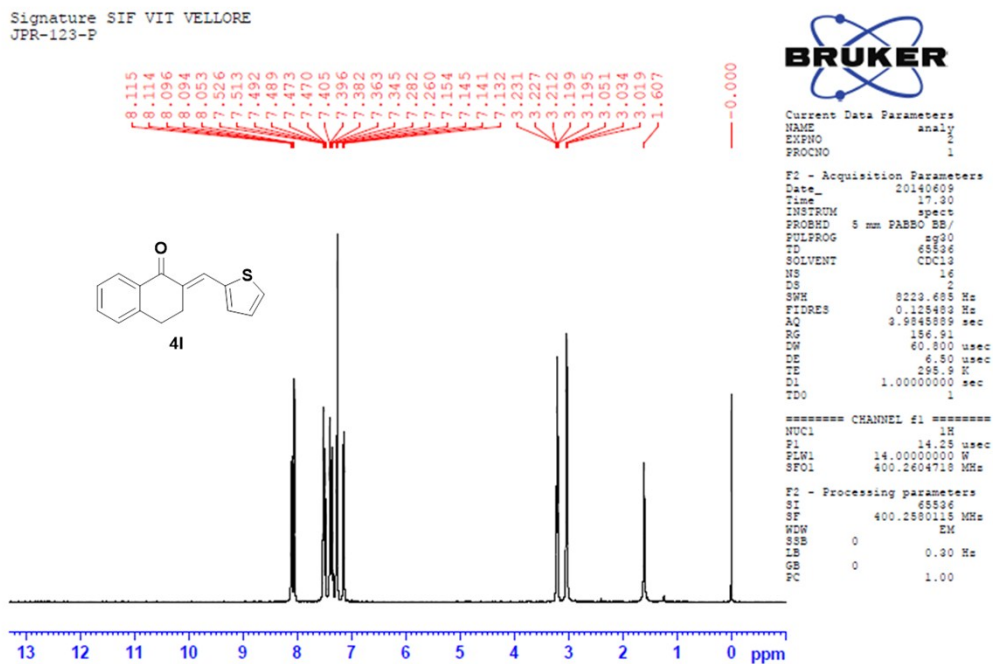

# <sup>1</sup>H NMR spectrum of compound (3m):

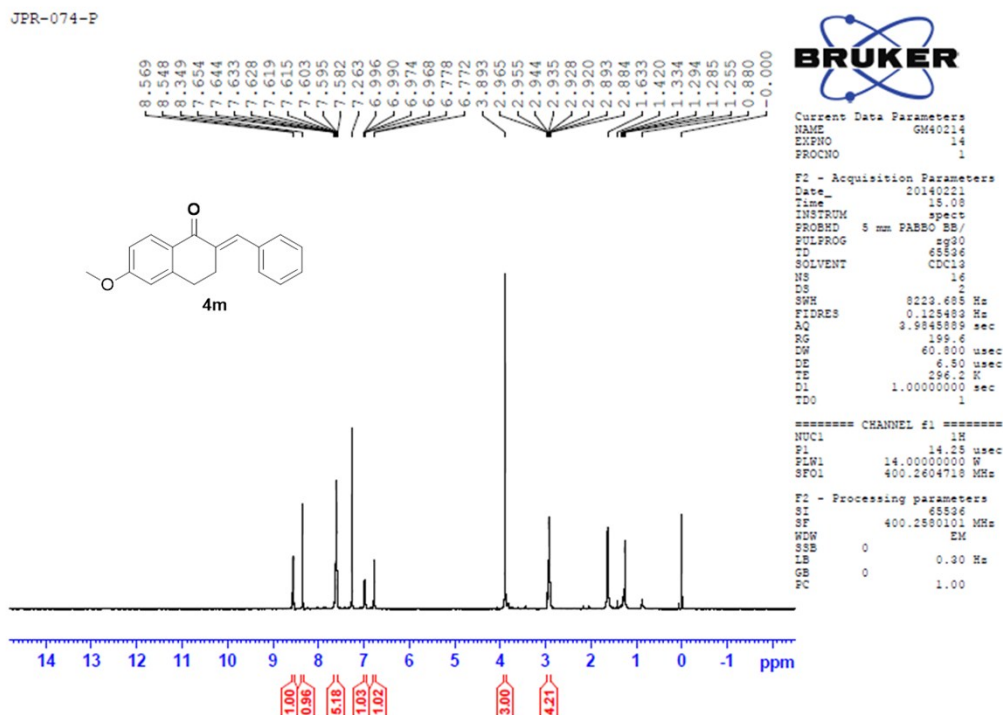

# <sup>1</sup>H NMR spectrum of compound (3n):

Signature SIF VIT VELLORE  
JPR-086-P

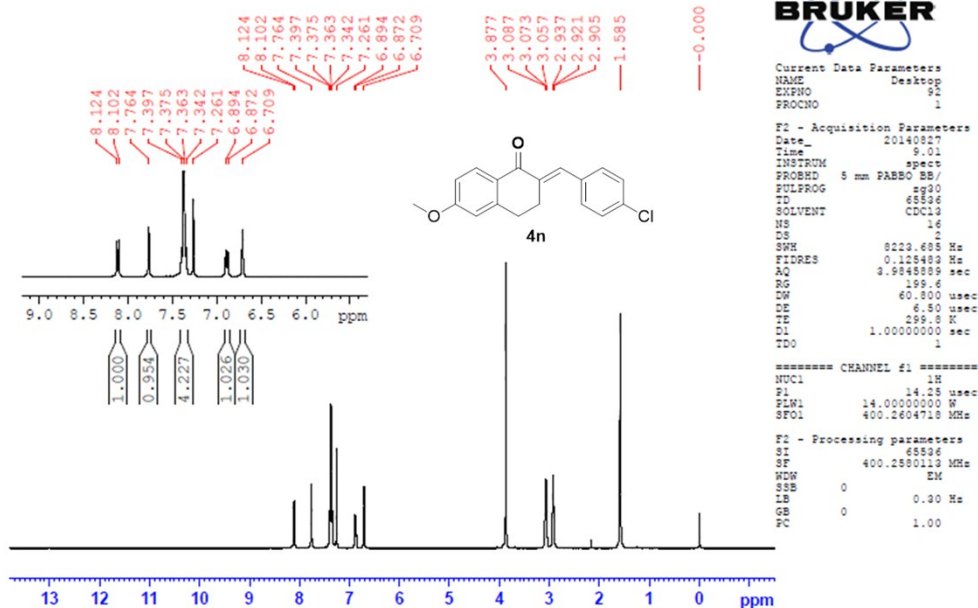

# <sup>1</sup>H NMR spectrum of compound (3o):

Signature SIF VIT VELLORE  
JPR-135-P

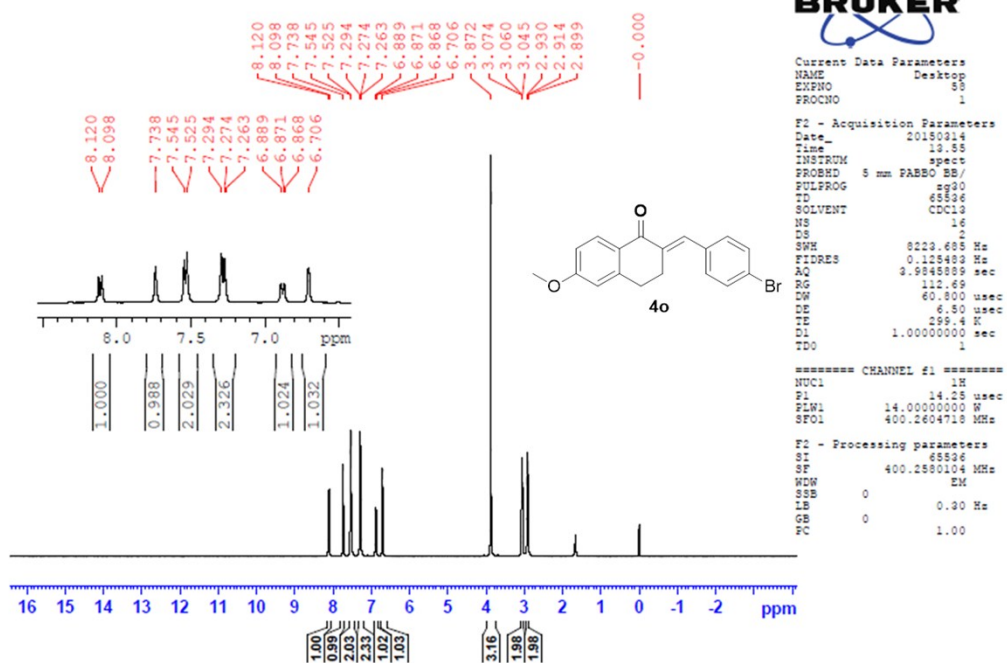



### <sup>1</sup>H NMR spectrum of compound (3p):

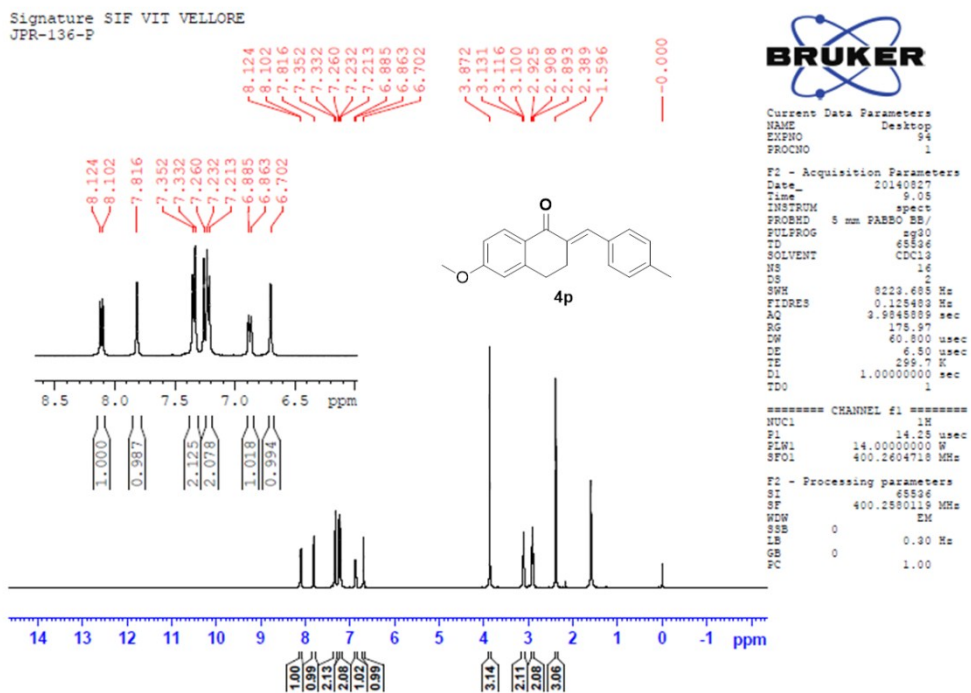

### <sup>1</sup>H NMR spectrum of compound (3q):

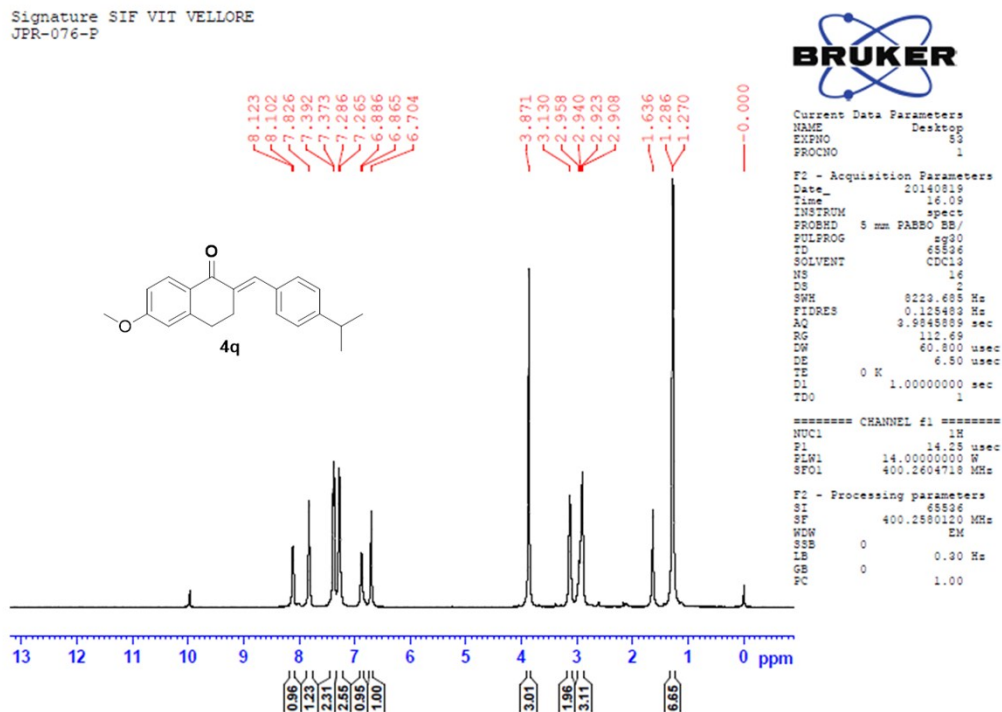

# <sup>1</sup>H NMR spectrum of compound (3s):

Signature SIF VIT VELLORE  
JPR-136-P

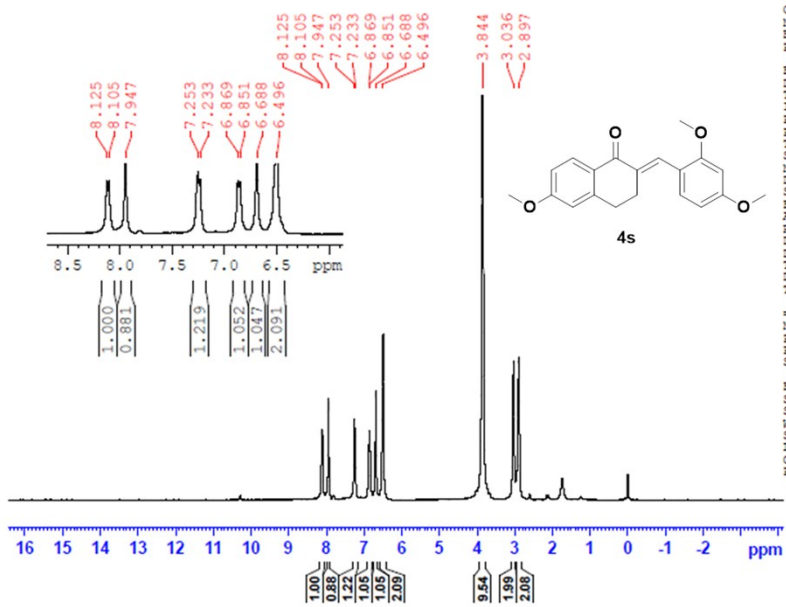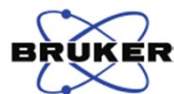

Current Data Parameters  
NAME Desktop  
EXPNO 56  
PROCNO 1

F2 - Acquisition Parameters  
Date\_ 20150314  
Time 13.48  
INSTRUM spect  
PROBHD 5 mm F4BBO BB/  
PULPROG zg30  
TD 65536  
SOLVENT CDCl3  
NS 16  
DS 2  
SWH 8223.685 Hz  
FIDRES 0.125498 Hz  
AQ 3.9845889 sec  
RG 77.73  
DW 60.800 usec  
DE 6.50 usec  
TE 299.4 K  
D1 1.00000000 sec  
TDO 1

===== CHANNEL f1 =====  
NUCL 1H  
P1 14.25 usec  
PLW1 14.00000000 W  
SFO1 400.2604718 MHz

F2 - Processing parameters  
SI 65536  
SF 400.260103 MHz  
WDW EM  
SSB 0  
LB 0.30 Hz  
GB 0  
PC 1.00

# <sup>1</sup>H NMR spectrum of compound (3t):

Signature SIF VIT VELLORE  
JPR-137-P

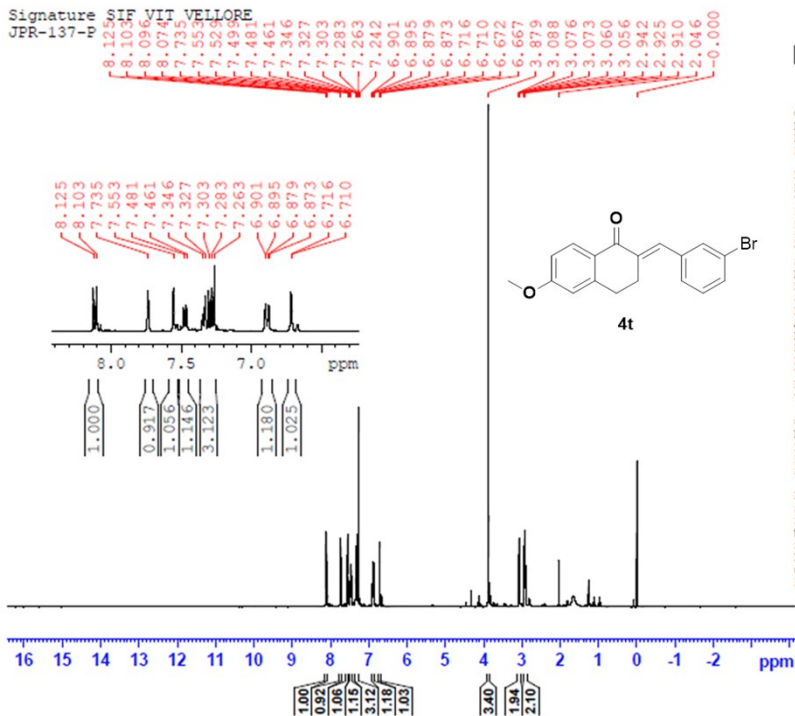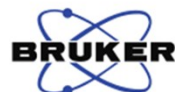

Current Data Parameters  
NAME Desktop  
EXPNO 57  
PROCNO 1

F2 - Acquisition Parameters  
Date\_ 20150314  
Time 13.52  
INSTRUM spect  
PROBHD 5 mm F4BBO BB/  
PULPROG zg30  
TD 65536  
SOLVENT CDCl3  
NS 16  
DS 2  
SWH 8223.685 Hz  
FIDRES 0.125498 Hz  
AQ 3.9845889 sec  
RG 143.73  
DW 60.800 usec  
DE 6.50 usec  
TE 299.4 K  
D1 1.00000000 sec  
TDO 1

===== CHANNEL f1 =====  
NUCL 1H  
P1 14.25 usec  
PLW1 14.00000000 W  
SFO1 400.2604718 MHz

F2 - Processing parameters  
SI 65536  
SF 400.260103 MHz  
WDW EM  
SSB 0  
LB 0.30 Hz  
GB 0  
PC 1.00

# <sup>1</sup>H NMR spectrum of compound (3u):

Signature SIF VIT VELLORE  
JPR-13P-P

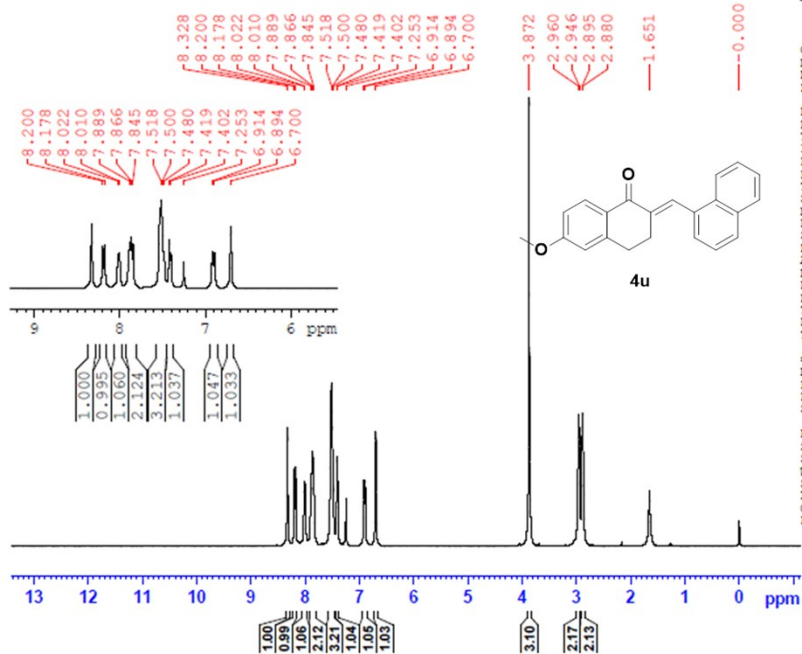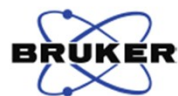

Current Data Parameters  
NAME Desktop  
EXPNO 48  
PROCNO 1

F2 - Acquisition Parameters  
Date\_ 20140813  
Time 12.49  
INSTRUM spect  
PROBHD 5 mm PABBO BB/  
PULPROG zg30  
TD 65536  
SOLVENT CDCl3  
NS 16  
DS 2  
SWH 8223.685 Hz  
FIDRES 0.125493 Hz  
AQ 3.984889 sec  
RG 127.79  
DW 60.800 usec  
DE 6.50 usec  
TE 300.2 K  
D1 1.00000000 sec  
TDO 1

===== CHANNEL f1 =====  
NUC1 1H  
P1 14.25 usec  
PL1 14.00000000 W  
SFO1 400.2604718 MHz

F2 - Processing parameters  
SI 65536  
SF 400.2580147 MHz  
WDW EM  
SSB 0  
LB 0.30 Hz  
GB 0  
PC 1.00

# <sup>1</sup>H NMR spectrum of compound (3v):

Signature SIF VIT VELLORE  
JPR-265-P

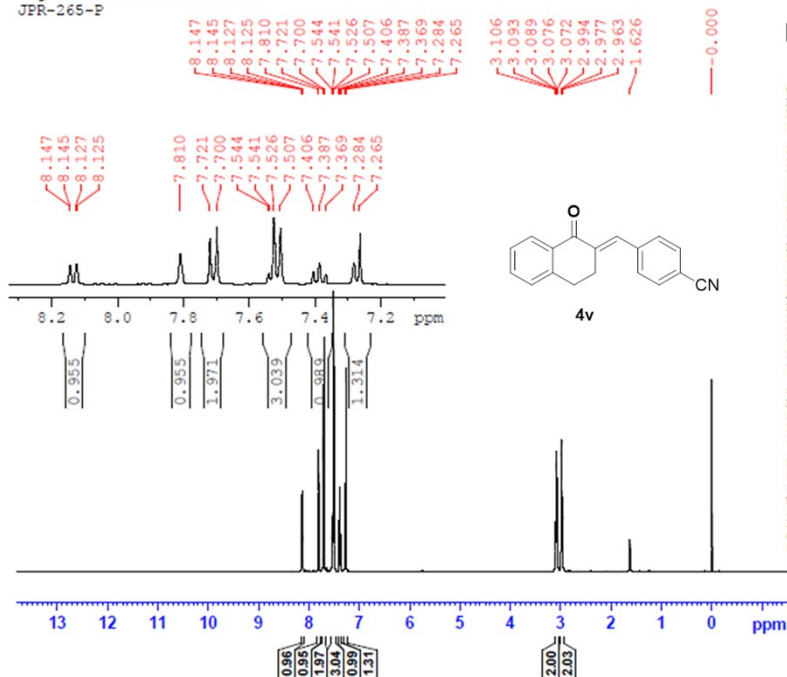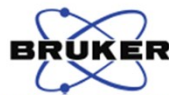

Current Data Parameters  
NAME desktop  
EXPNO 10  
PROCNO 1

F2 - Acquisition Parameters  
Date\_ 20150305  
Time 16.39  
INSTRUM spect  
PROBHD 5 mm PABBO BB/  
PULPROG zg30  
TD 65536  
SOLVENT CDCl3  
NS 16  
DS 2  
SWH 8223.685 Hz  
FIDRES 0.125493 Hz  
AQ 3.984889 sec  
RG 127.79  
DW 60.800 usec  
DE 6.50 usec  
TE 300.2 K  
D1 1.00000000 sec  
TDO 1

===== CHANNEL f1 =====  
NUC1 1H  
P1 14.25 usec  
PL1 14.00000000 W  
SFO1 400.2604718 MHz

F2 - Processing parameters  
SI 65536  
SF 400.2580096 MHz  
WDW EM  
SSB 0  
LB 0.30 Hz  
GB 0  
PC 1.00

# Copies of <sup>1</sup>H NMR, <sup>13</sup>C NMR and HRMS of [5(a-u) & 6(a-f)]

## <sup>1</sup>H NMR spectrum of compound (5a):

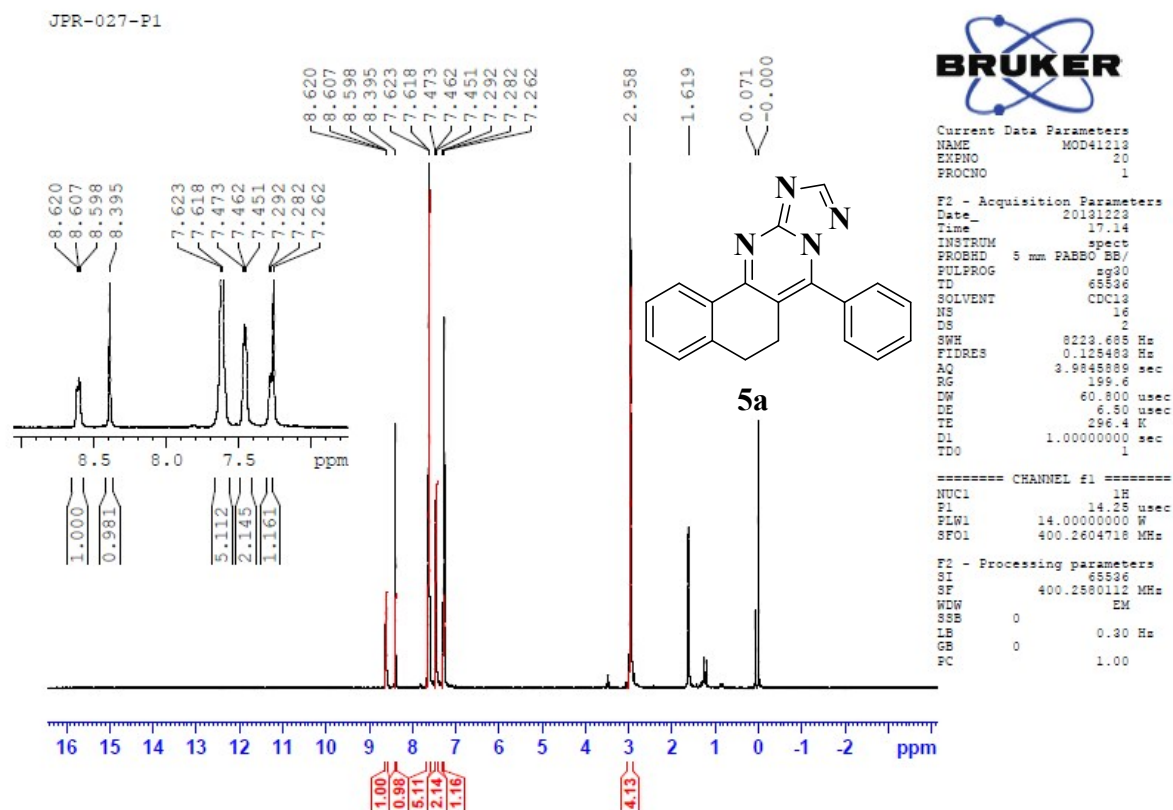

## <sup>13</sup>C NMR spectrum of compound (5a):

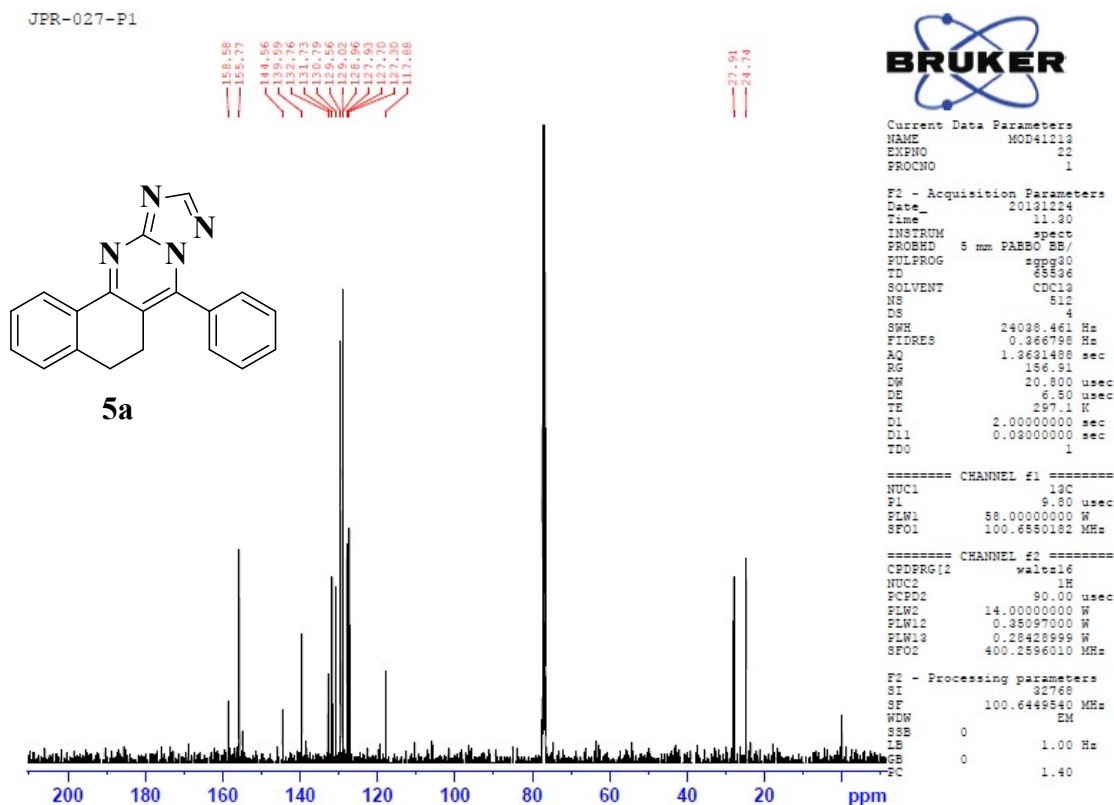

## HRMS spectrum of compound (5a):

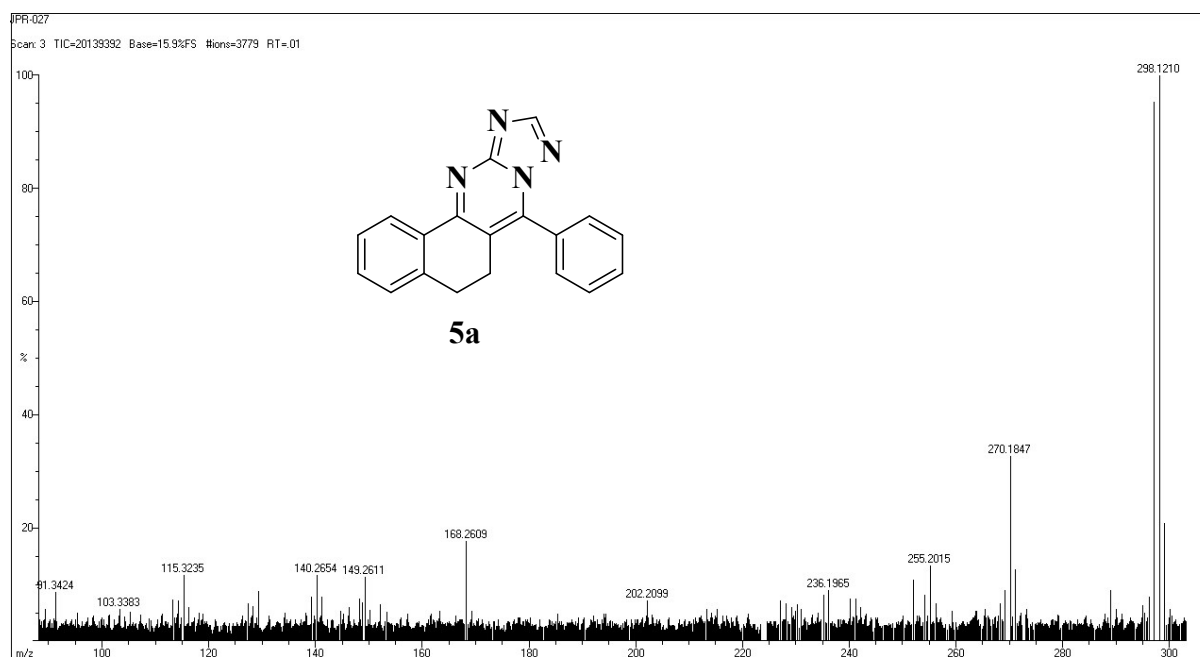

## <sup>1</sup>H NMR spectrum of compound (5b):

Signature SIF VIT VELLORE  
JPR-129-P

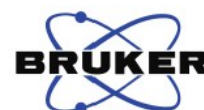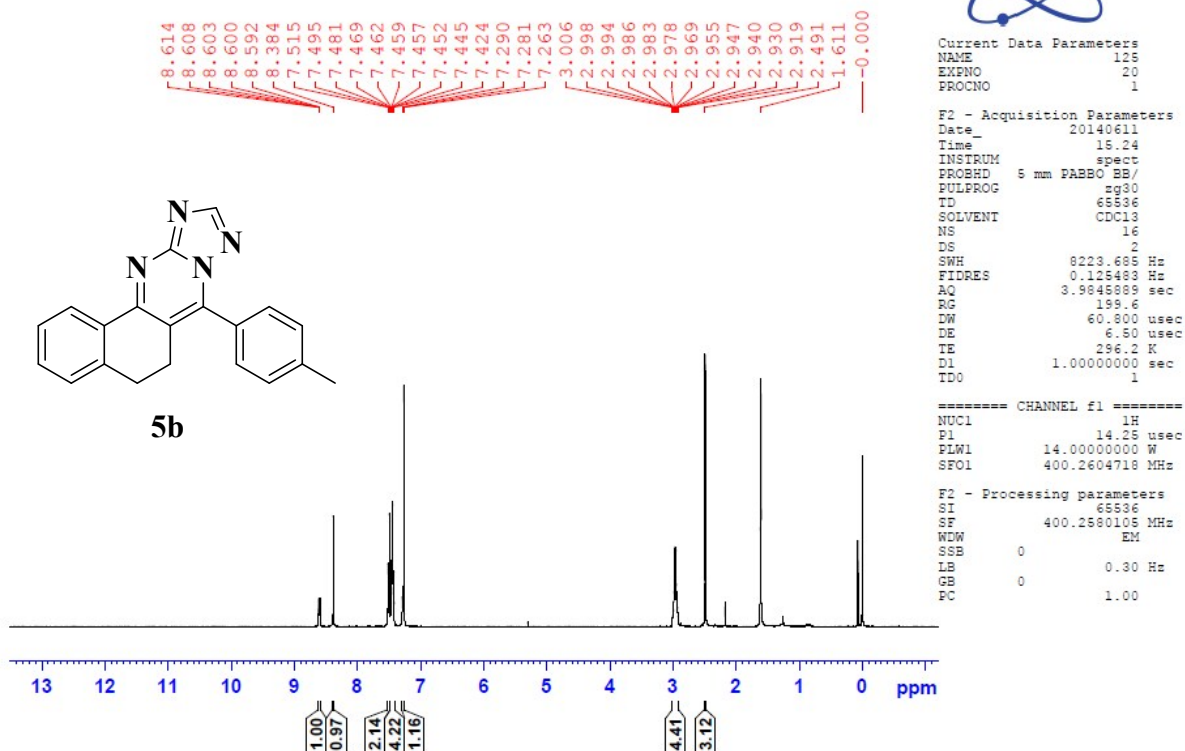

## Expanded <sup>1</sup>H NMR spectrum of compound (5b):

Signature SIF VIT VELLORE  
JPR-129-P

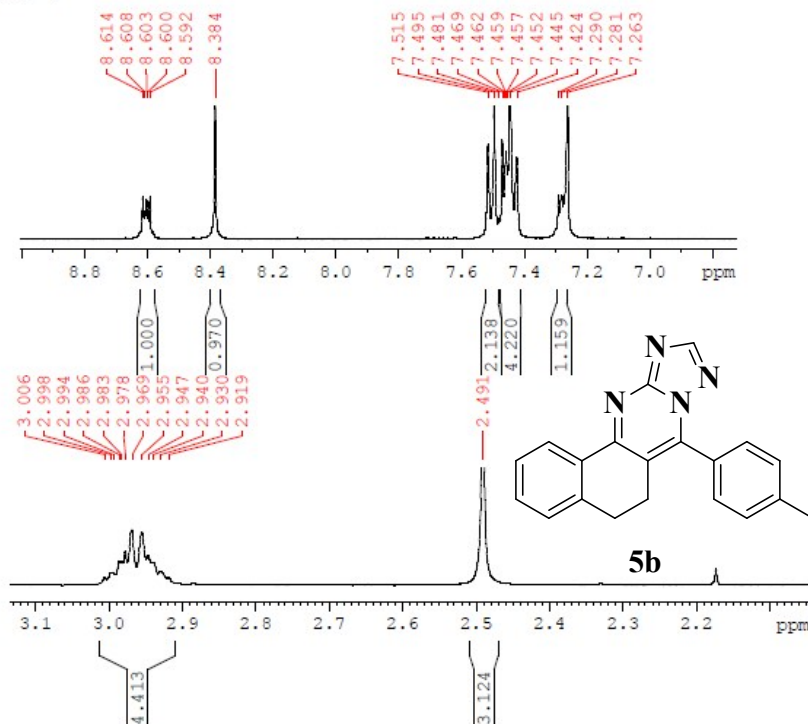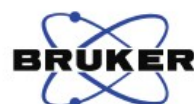

Current Data Parameters  
NAME 125  
EXPNO 20  
PROCNO 1

F2 - Acquisition Parameters  
Date\_ 20140611  
Time 15.24  
INSTRUM spect  
PROBHD 5 mm PABBO BB/  
PULPROG zg30  
TD 65536  
SOLVENT CDCl3  
NS 16  
DS 2  
SWH 8223.688 Hz  
FIDRES 0.125483 Hz  
AQ 3.9845889 sec  
RG 199.6  
DW 60.800 usec  
DE 6.50 usec  
TE 296.2 K  
D1 1.00000000 sec  
TDO 1

===== CHANNEL f1 =====  
NUC1 1H  
P1 14.25 usec  
PLW1 14.0000000 W  
SFO1 400.2604718 MHz

F2 - Processing parameters  
SI 65536  
SF 400.2580105 MHz  
WDW EM  
SSE 0  
LB 0.30 Hz  
GB 0  
PC 1.00

## <sup>13</sup>C NMR spectrum of compound (5b):

Signature SIF VIT VELLORE  
JPR-129-P

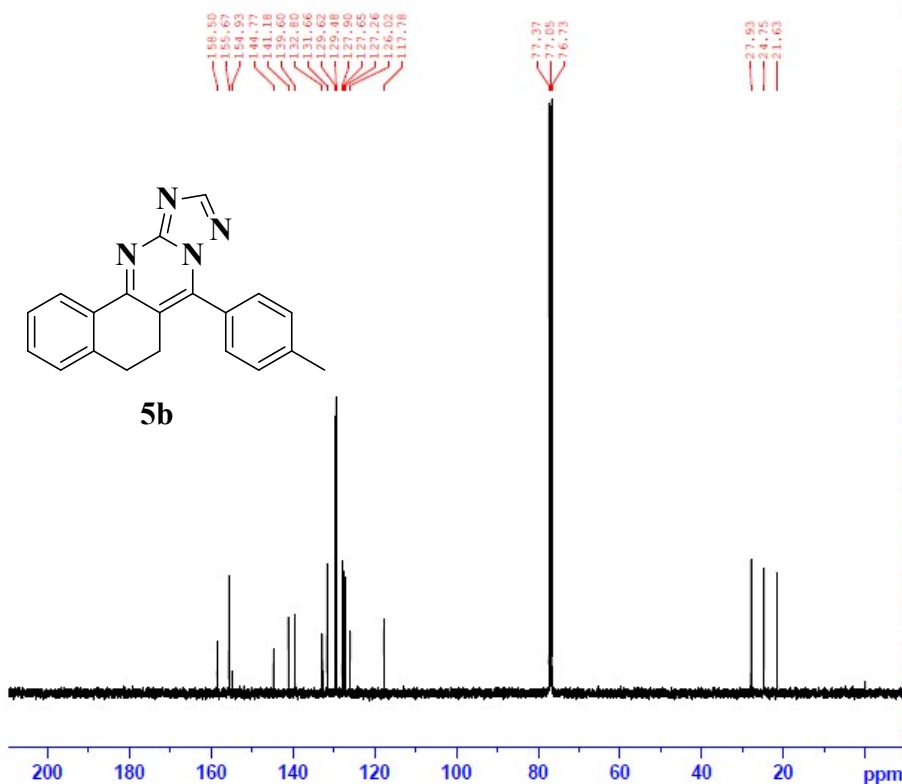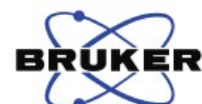

Current Data Parameters  
NAME 125  
EXPNO 8  
PROCNO 1

F2 - Acquisition Parameters  
Date\_ 20140610  
Time 14.53  
INSTRUM spect  
PROBHD 5 mm PABBO BB/  
PULPROG zgpg30  
TD 65536  
SOLVENT CDCl3  
NS 512  
DS 4  
SWH 24038.461 Hz  
FIDRES 0.366798 Hz  
AQ 1.3631488 sec  
RG 127.79  
DW 20.800 usec  
DE 6.50 usec  
TE 296.2 K  
D1 2.00000000 sec  
D11 0.03000000 sec  
TDO 1

===== CHANNEL f1 =====  
NUC1 13C  
P1 9.30 usec  
PLW1 58.0000000 W  
SFO1 100.6250182 MHz

===== CHANNEL f2 =====  
CPDPRG2 waltz16  
NUC2 1H  
PCPD2 80.00 usec  
PLW2 14.0000000 W  
PLW12 0.35807000 W  
PLW13 0.28428999 W  
SFO2 400.2596010 MHz

F2 - Processing parameters  
SI 32768  
SF 100.6449540 MHz  
WDW EM  
SSE 0  
LB 1.00 Hz  
GB 0  
PC 1.40

## HRMS spectrum of compound (5b):

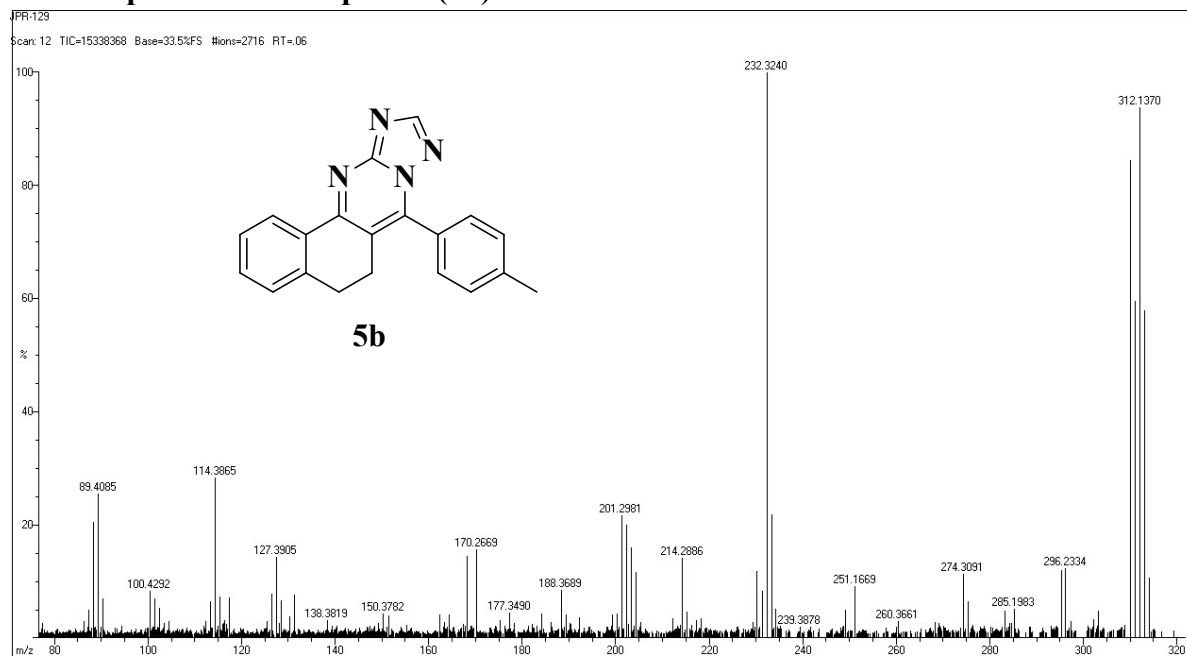

## <sup>1</sup>H NMR spectrum of compound (5c):

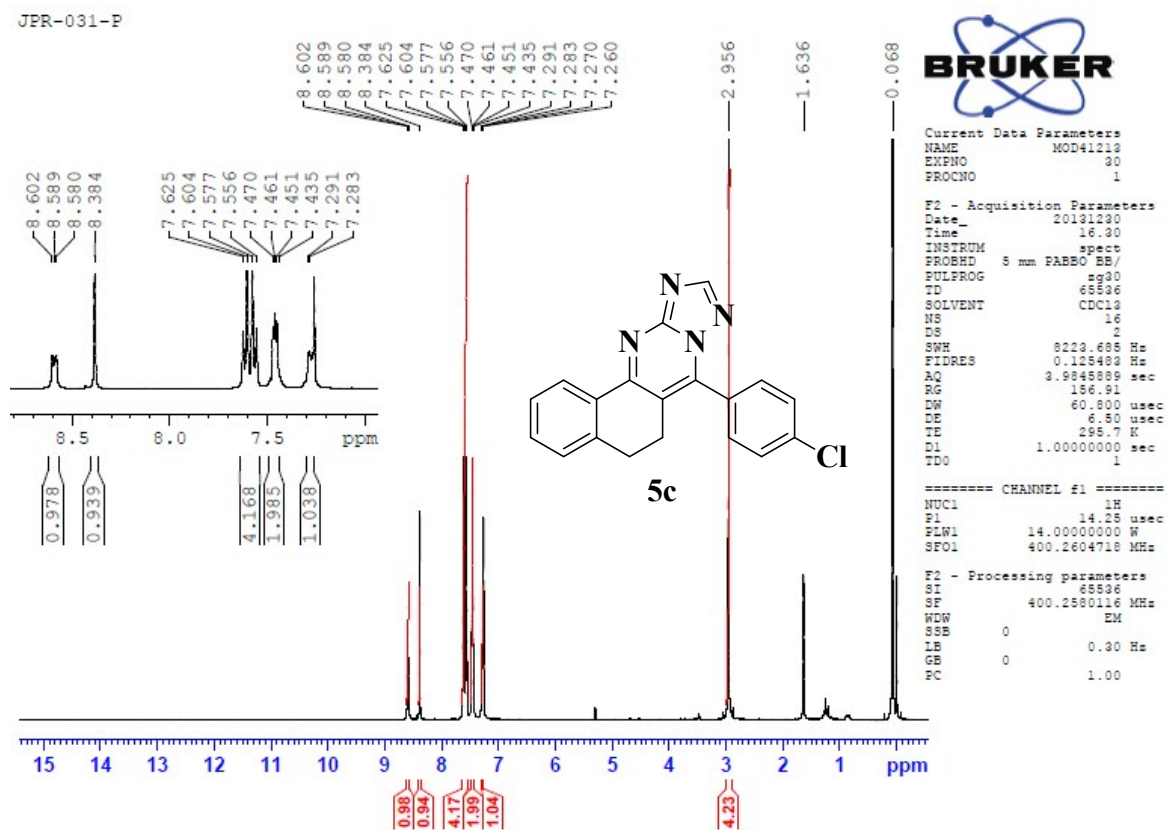

# <sup>13</sup>C NMR spectrum of compound (5c):

JPR-031-P

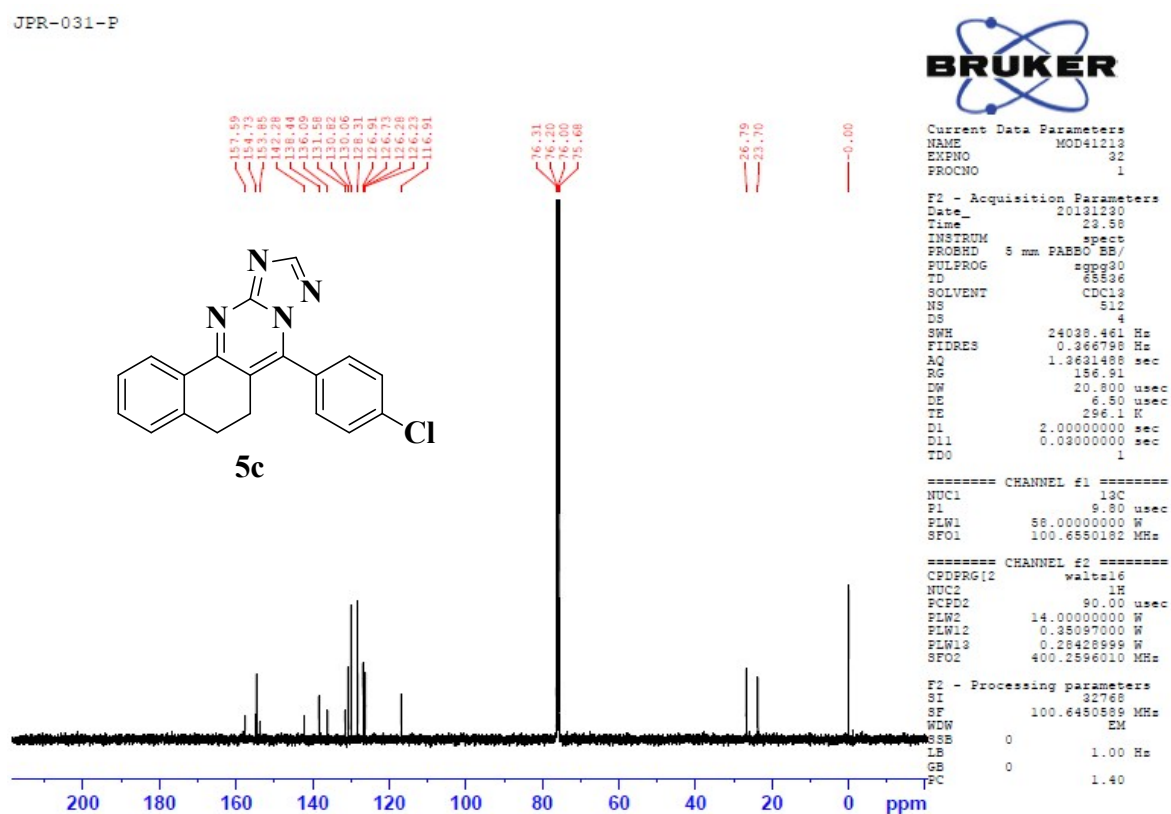

# HRMS spectrum of compound (5c):

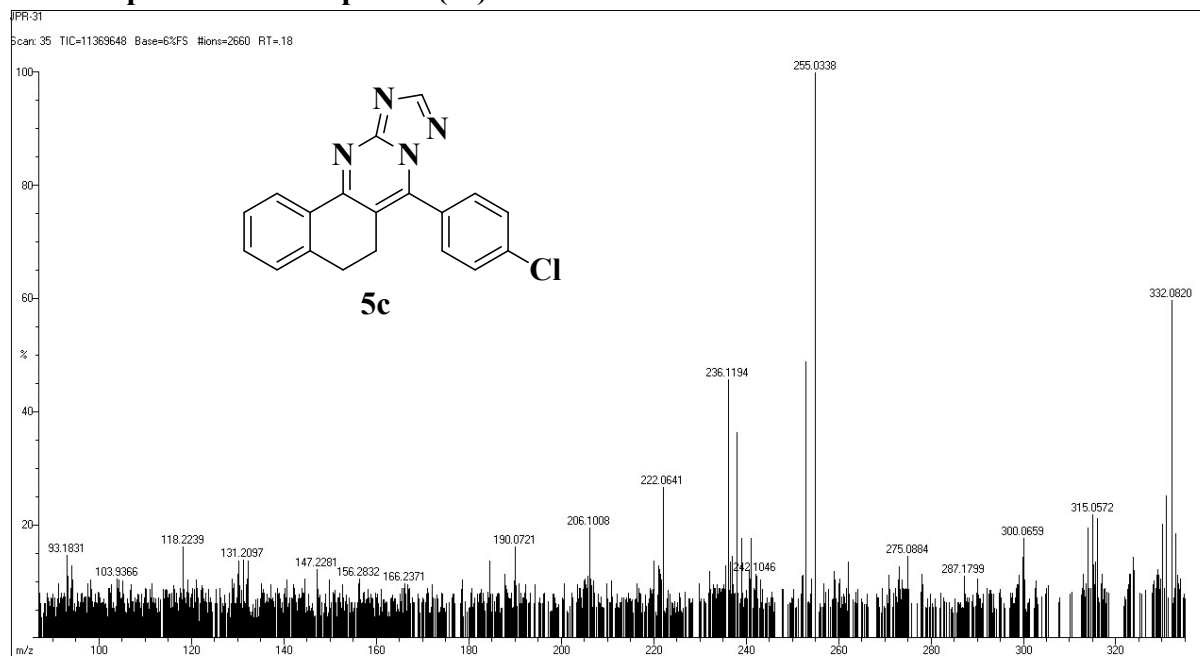

# <sup>1</sup>H NMR spectrum of compound (5d):



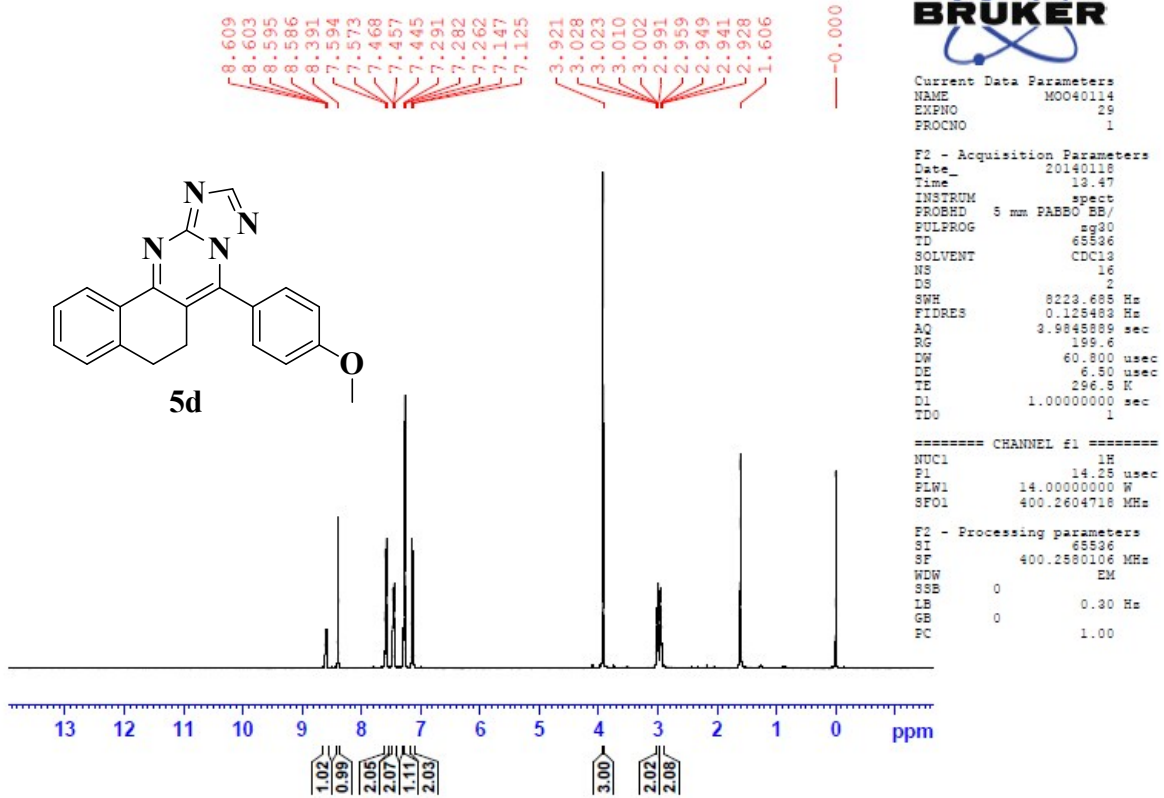

Expanded <sup>1</sup>H NMR spectrum of compound (5d):

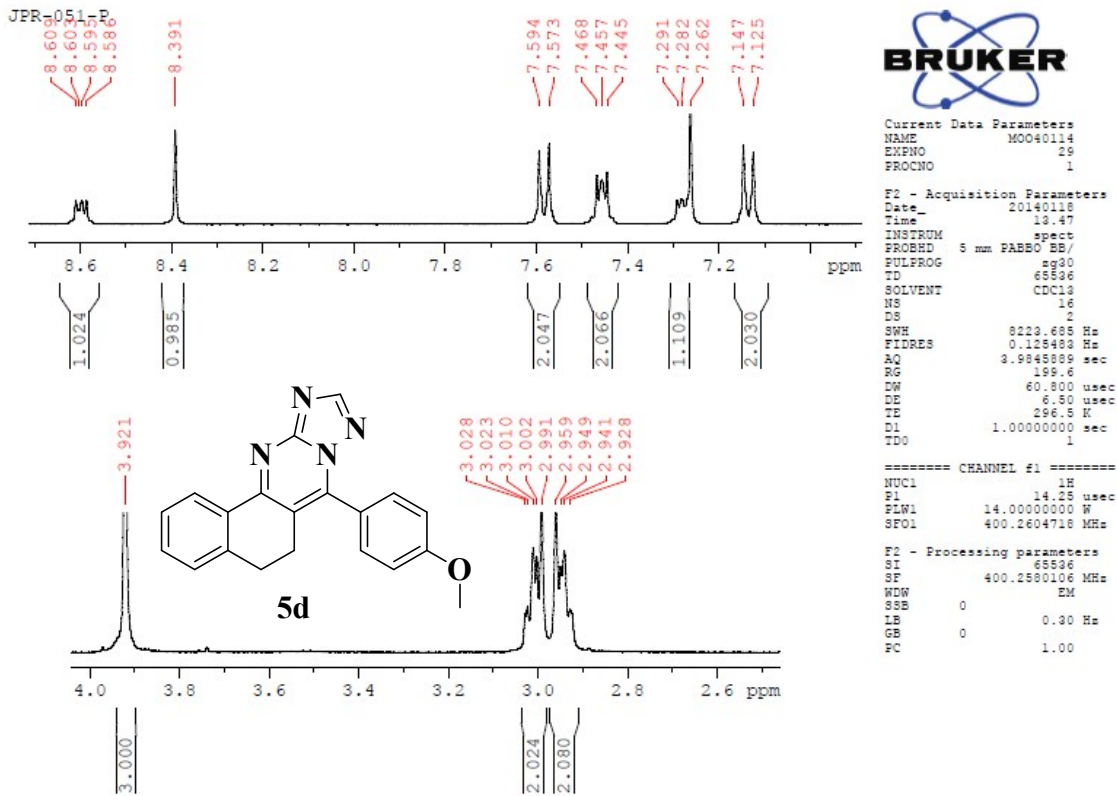

# <sup>13</sup>C NMR spectrum of compound (5d):

JPR-051-P

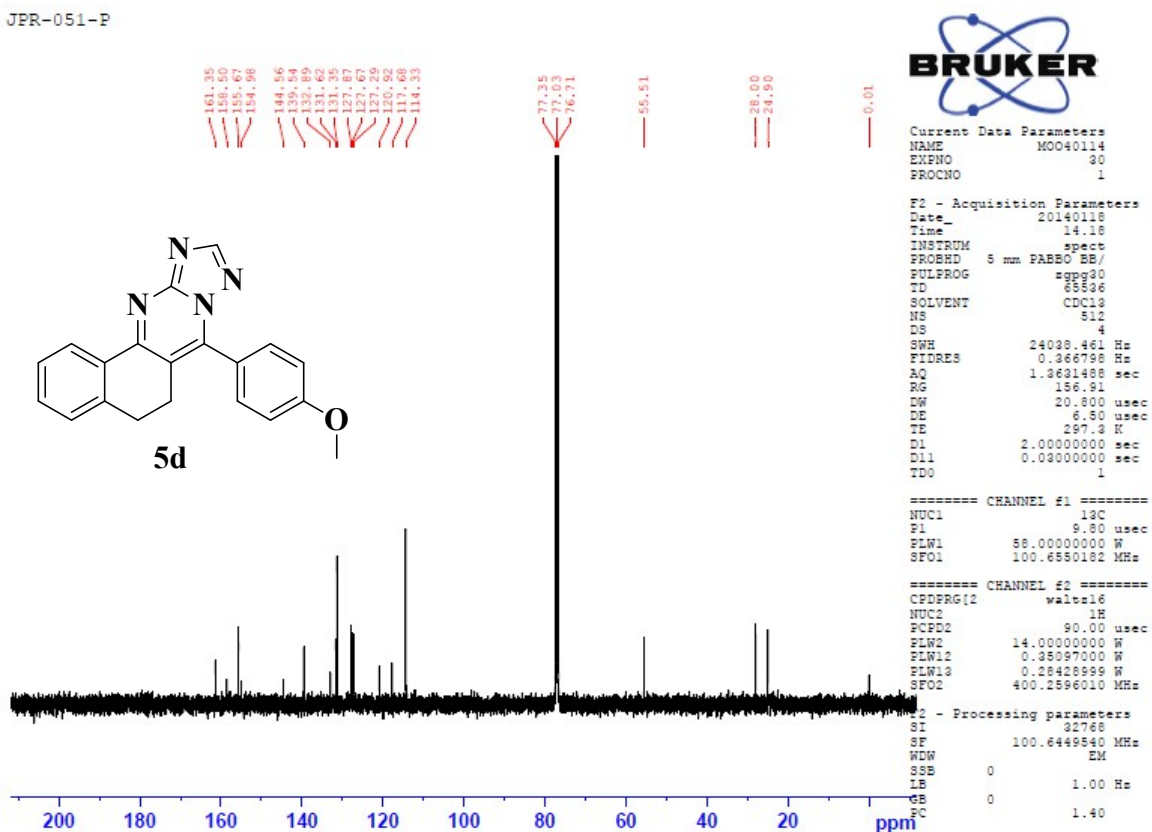

# HRMS spectrum of compound (5d):

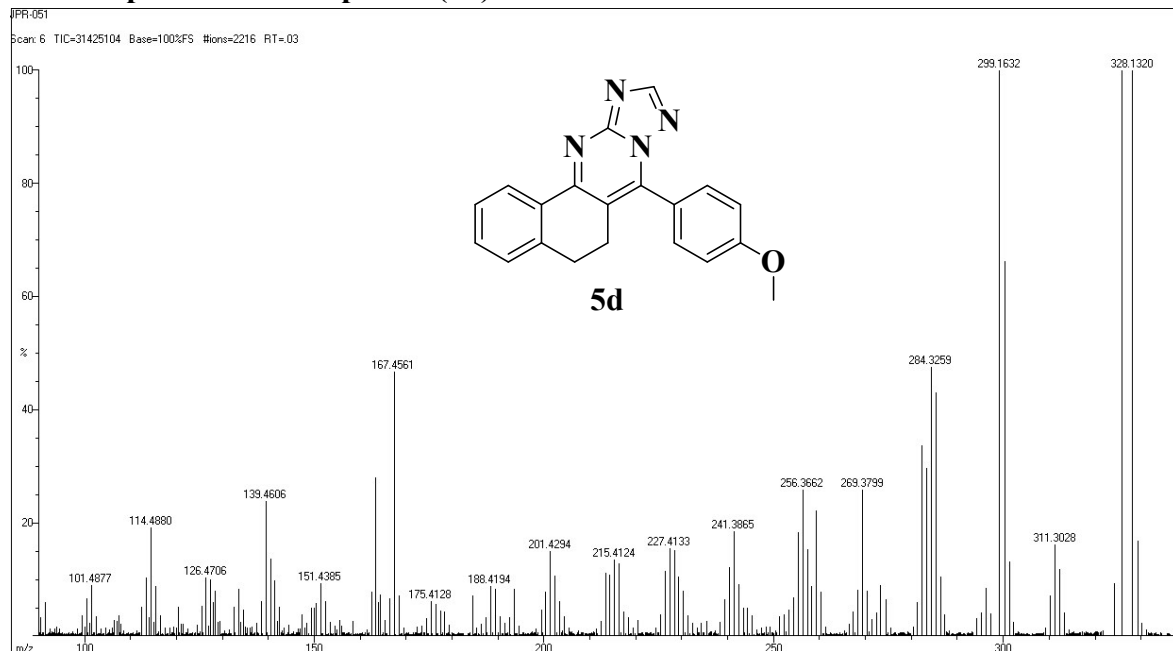

# <sup>1</sup>H NMR spectrum of compound (5e):

Signature SIF VIT VELLORE  
JPR-103P

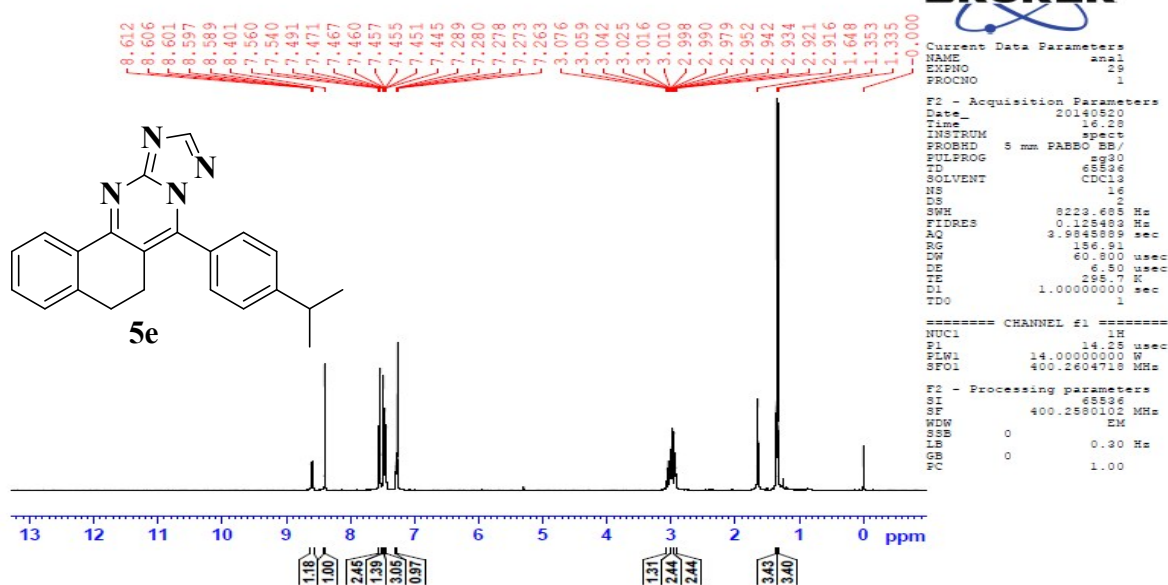

# Expanded <sup>1</sup>H NMR spectrum of compound (5e):

Signature SIF VIT VELLORE  
JPR-103P

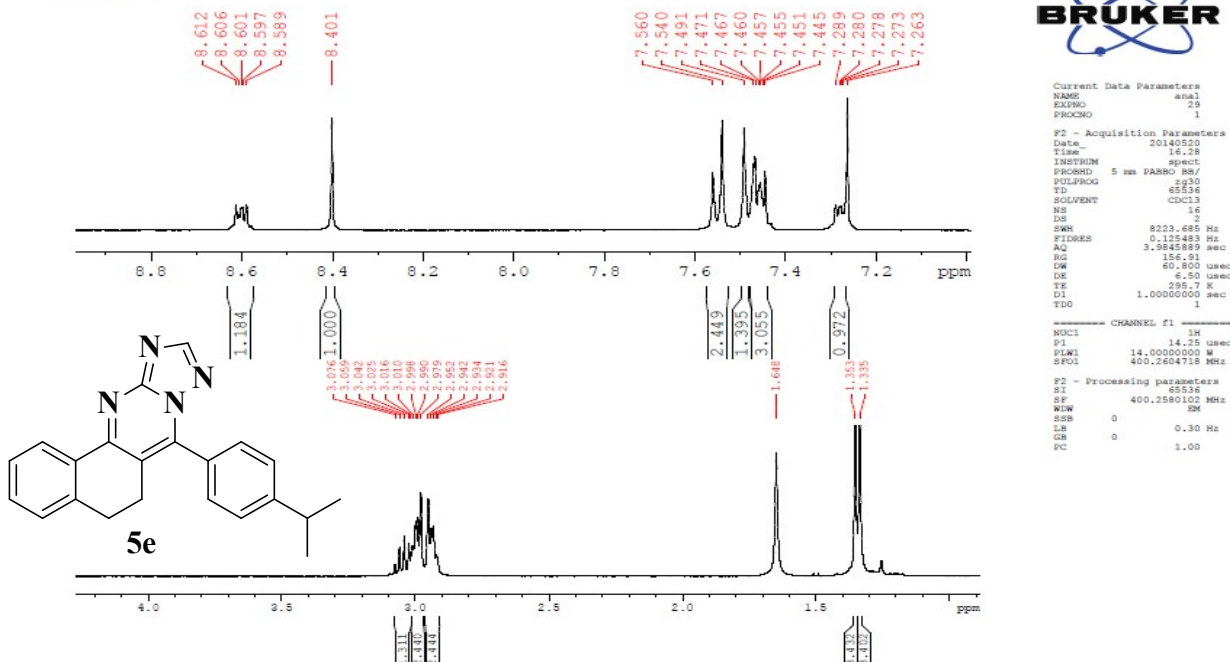

### <sup>13</sup>C NMR spectrum of compound (5e):

Signature SIF VIT VELLORE  
JPR-103-P

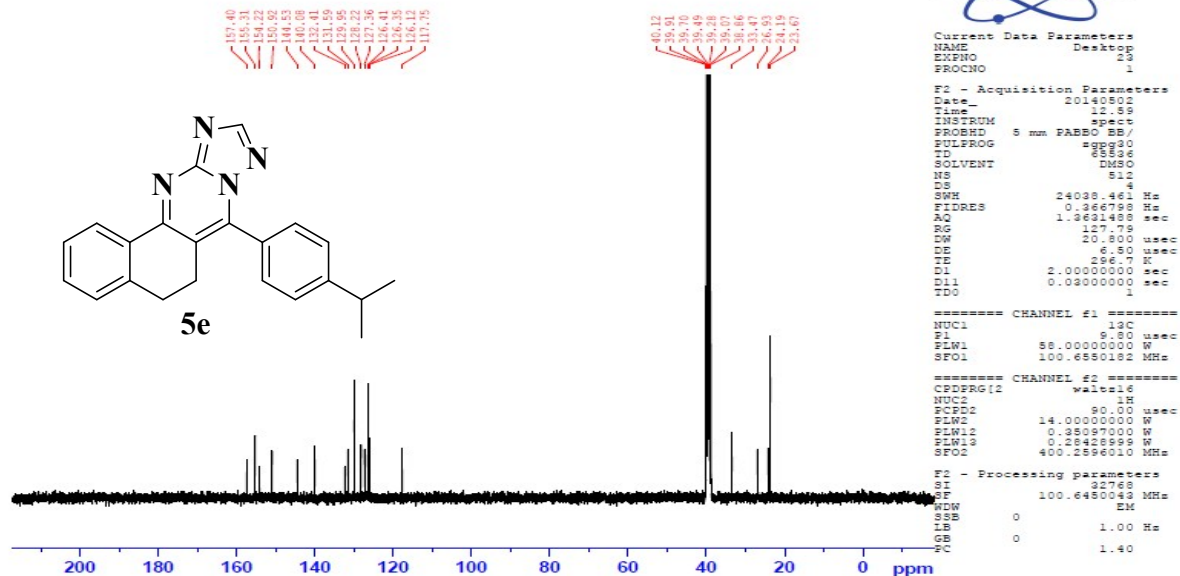

### HRMS spectrum of compound (5e):

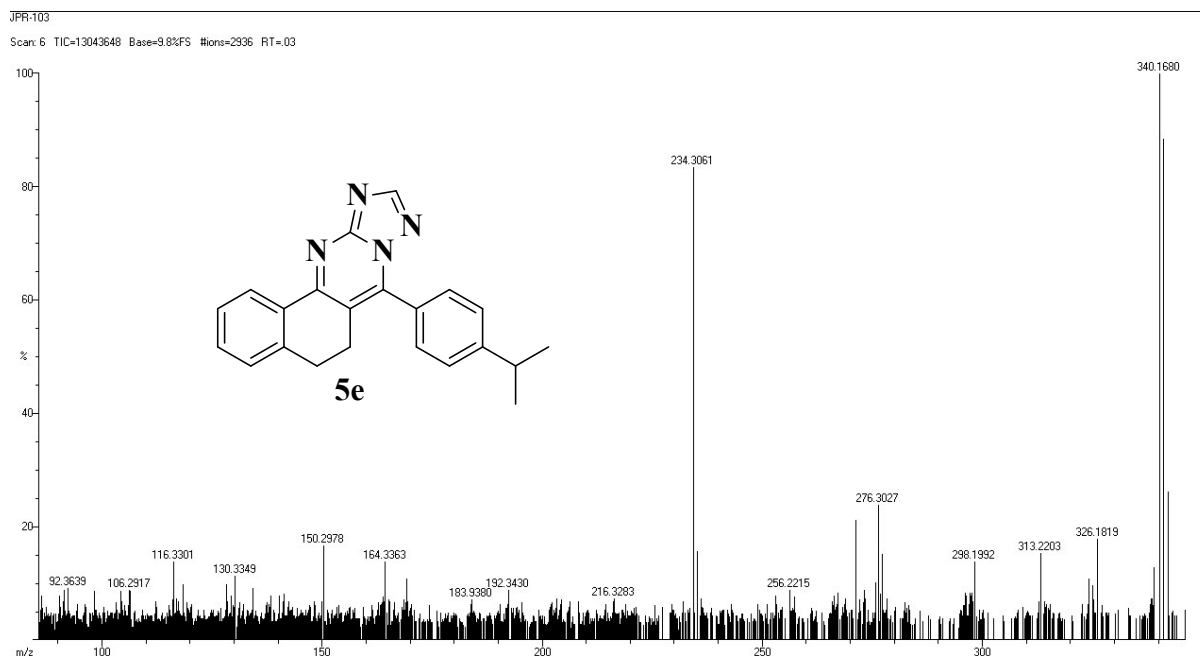

# <sup>1</sup>H NMR spectrum of compound (5f):

Signature SIF VIT VELLORE  
JPR-130-P

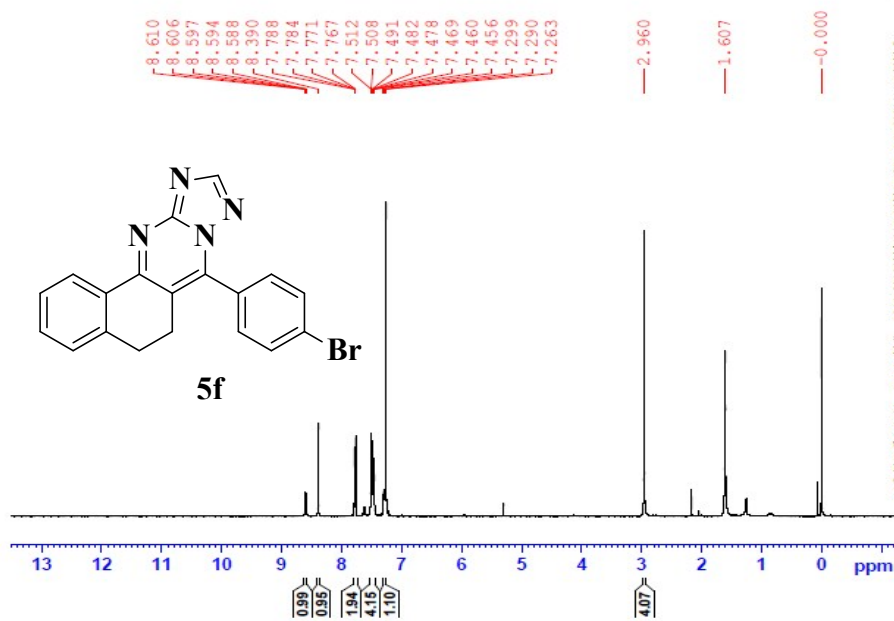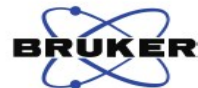

```
Current Data Parameters
NAME      126
EXPNO    19
PROCNO   1

F2 - Acquisition Parameters
Date_    20140611
Time     15.20
INSTRUM  spect
PROBHD   5 mm PABBO BB/
PULPROG  zg30
TD       65536
SOLVENT  CDCl3
NS       16
DS       8223.636 Hz
FIDRES   0.128483 Hz
AQ       3.9845899 sec
RG       199.6
SM       60.800 usec
DE       6.50 usec
TE       296.1 K
D1       1.00000000 sec
TD0      1

===== CHANNEL f1 =====
NUC1     1H
P1       14.25 usec
PLW1    14.00000000 W
SFO1    400.2604718 MHz

F2 - Processing parameters
SI       65536
SF       400.2580105 MHz
WDW      EM
SSB      0
LB       0.30 Hz
GB       0
PC       1.00
```

# Expanded <sup>1</sup>H NMR spectrum of compound (5f):

Signature SIF VIT VELLORE  
JPR-130-P

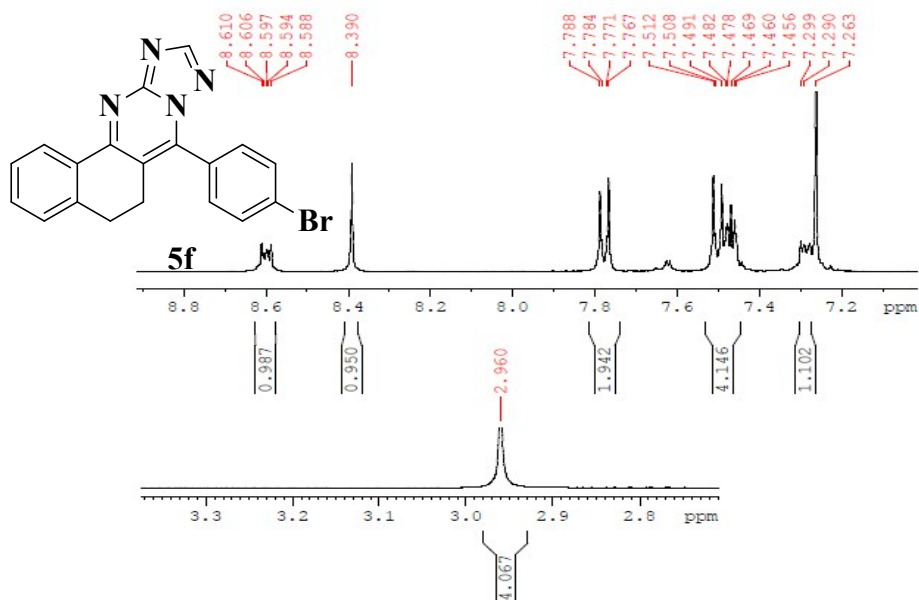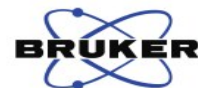

```
Current Data Parameters
NAME      126
EXPNO    19
PROCNO   1

F2 - Acquisition Parameters
Date_    20140611
Time     15.20
INSTRUM  spect
PROBHD   5 mm PABBO BB/
PULPROG  zg30
TD       65536
SOLVENT  CDCl3
NS       16
DS       8223.636 Hz
FIDRES   0.128483 Hz
AQ       3.9845899 sec
RG       199.6
SM       60.800 usec
DE       6.50 usec
TE       296.1 K
D1       1.00000000 sec
TD0      1

===== CHANNEL f1 =====
NUC1     1H
P1       14.25 usec
PLW1    14.00000000 W
SFO1    400.2604718 MHz

F2 - Processing parameters
SI       65536
SF       400.2580105 MHz
WDW      EM
SSB      0
LB       0.30 Hz
GB       0
PC       1.00
```

# <sup>13</sup>C NMR spectrum of compound (5f):

Signature SIF VIT VELLORE  
JPR-130-P

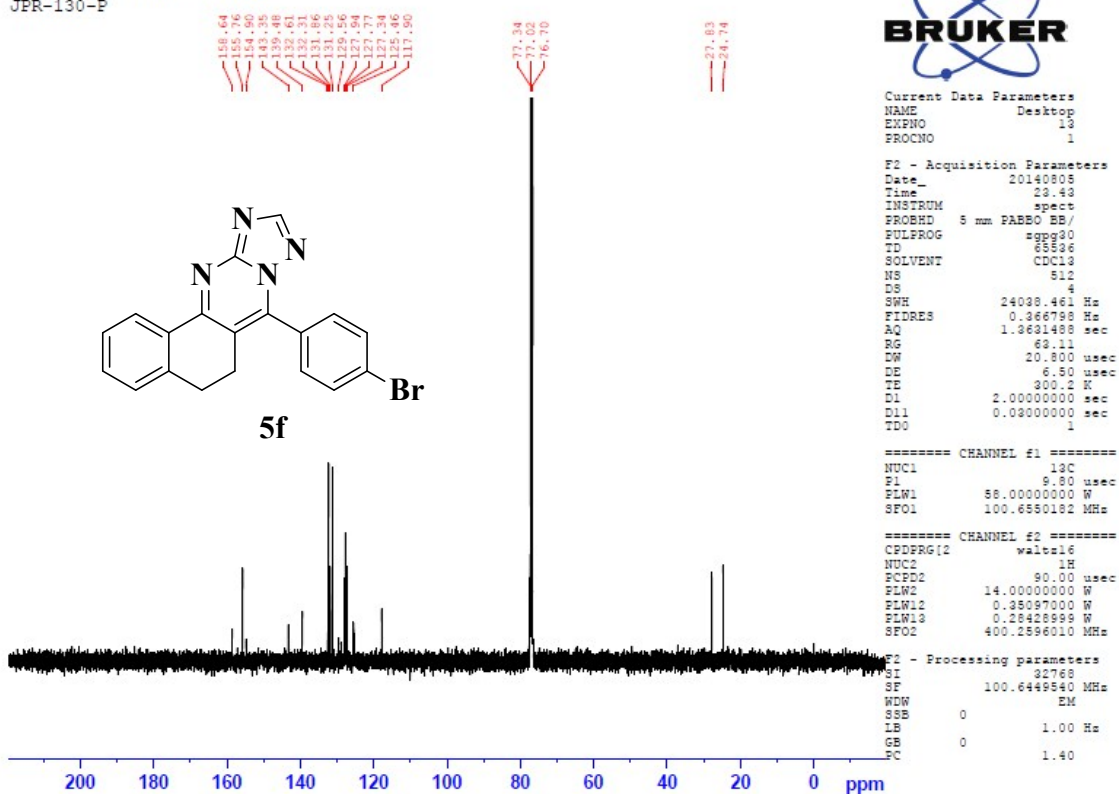

# HRMS spectrum of compound (5f):

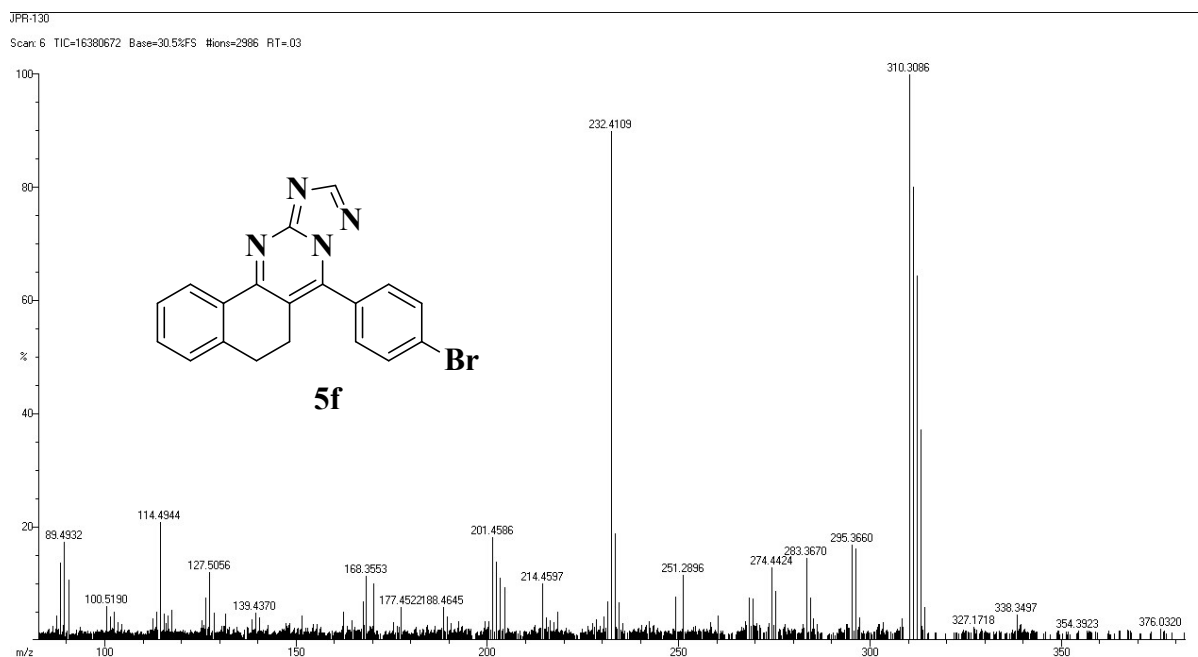

# <sup>1</sup>H NMR spectrum of compound (5g):

Signature SIF VIT VELLORE  
JPR-131-P

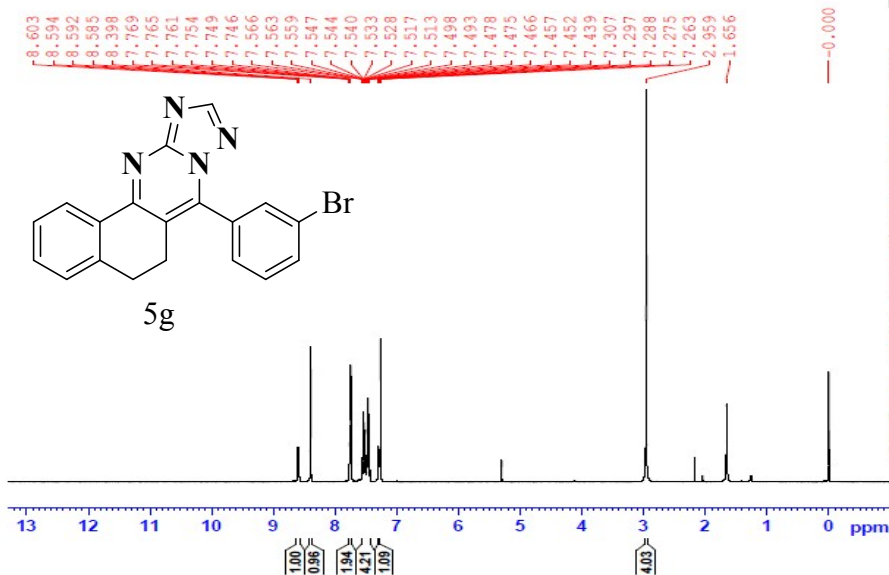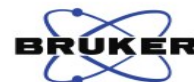

Current Data Parameters  
NAME Desktop  
EXPNO 5  
PROCNO 1

F2 - Acquisition Parameters  
Date\_ 20140717  
Time 23.24  
INSTRUM spect  
PROBHD 5 mm PABBO BB/  
PULPROG zgpg30  
TD 65536  
SOLVENT CDCl3  
NS 16  
DS 2  
SWH 8223.655 Hz  
FIDRES 0.103453 Hz  
AQ 3.984583 sec  
RG 178.97  
DW 178.97 usec  
DE 60.800 usec  
TE 296.4 K  
D1 1.00000000 sec  
TDO 1

===== CHANNEL #1 =====  
NUC1 1H  
P1 14.25 usec  
PL1 14.0000000 W  
SFO1 400.2604718 MHz

F2 - Processing parameters  
SI 65536  
SF 400.2604718 MHz  
WDW EM  
SSB 0  
LB 0.30 Hz  
GB 0  
PC 1.00

# Expanded <sup>1</sup>H NMR spectrum of compound (5g):

Signature SIF VIT VELLORE  
JPR-131-P

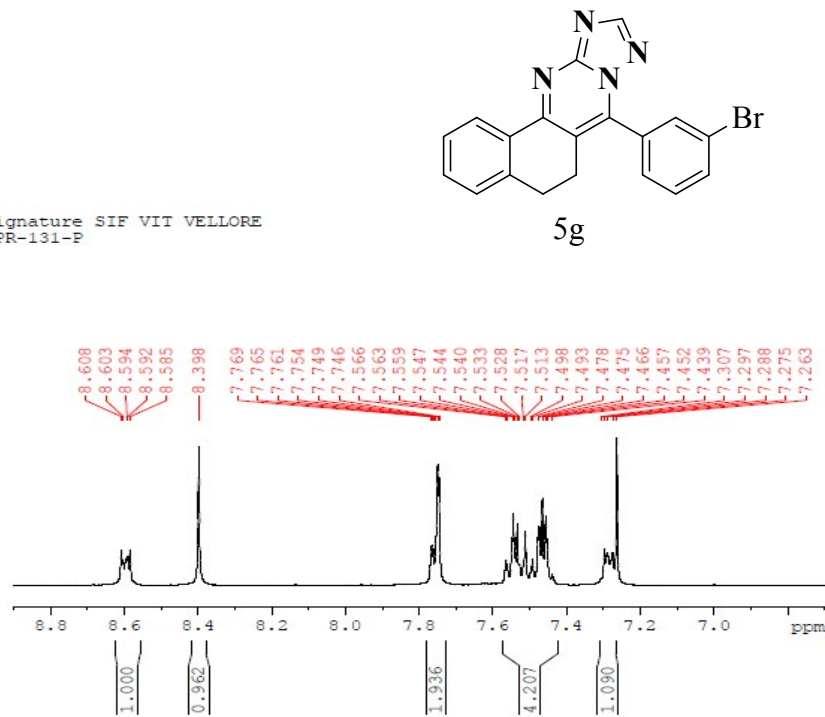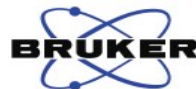

Current Data Parameters  
NAME Desktop  
EXPNO 5  
PROCNO 1

F2 - Acquisition Parameters  
Date\_ 20140717  
Time 23.24  
INSTRUM spect  
PROBHD 5 mm PABBO BB/  
PULPROG zgpg30  
TD 65536  
SOLVENT CDCl3  
NS 16  
DS 2  
SWH 8223.655 Hz  
FIDRES 0.103453 Hz  
AQ 3.984583 sec  
RG 178.97  
DW 178.97 usec  
DE 60.800 usec  
TE 296.4 K  
D1 1.00000000 sec  
TDO 1

===== CHANNEL #1 =====  
NUC1 1H  
P1 14.25 usec  
PL1 14.0000000 W  
SFO1 400.2604718 MHz

F2 - Processing parameters  
SI 65536  
SF 400.2604718 MHz  
WDW EM  
SSB 0  
LB 0.30 Hz  
GB 0  
PC 1.00

### <sup>13</sup>C NMR spectrum of compound (5g):

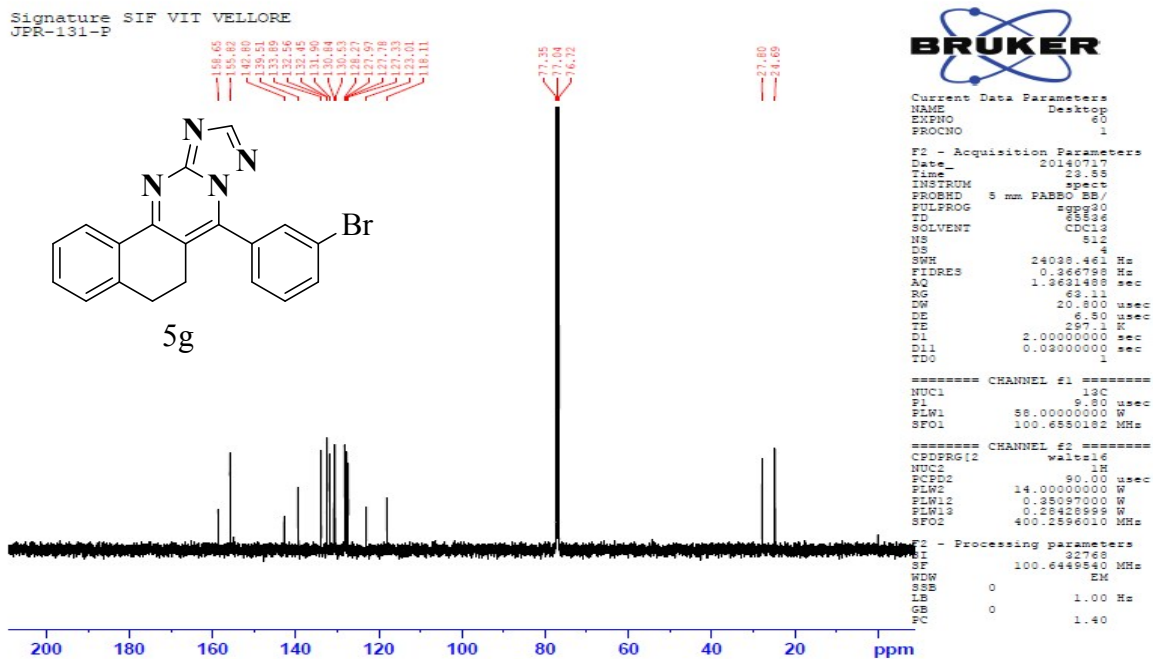

### HRMS spectrum of compound (5g):

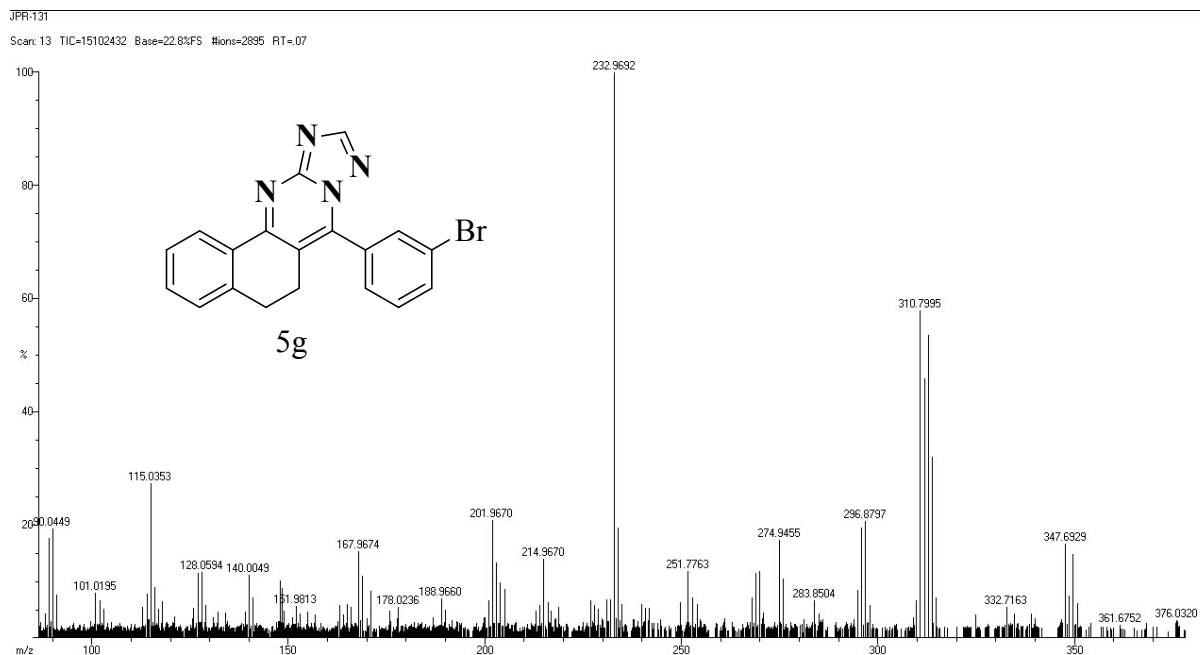



# <sup>1</sup>H NMR spectrum of compound (5h):

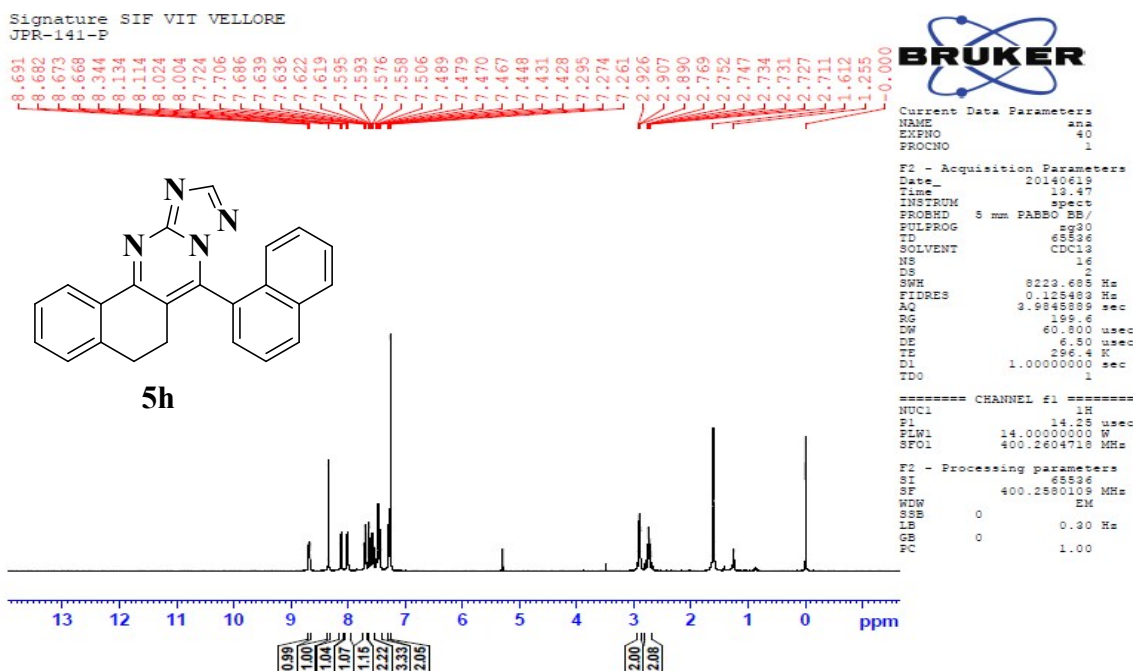

# Expanded <sup>1</sup>H NMR spectrum of compound (5h):

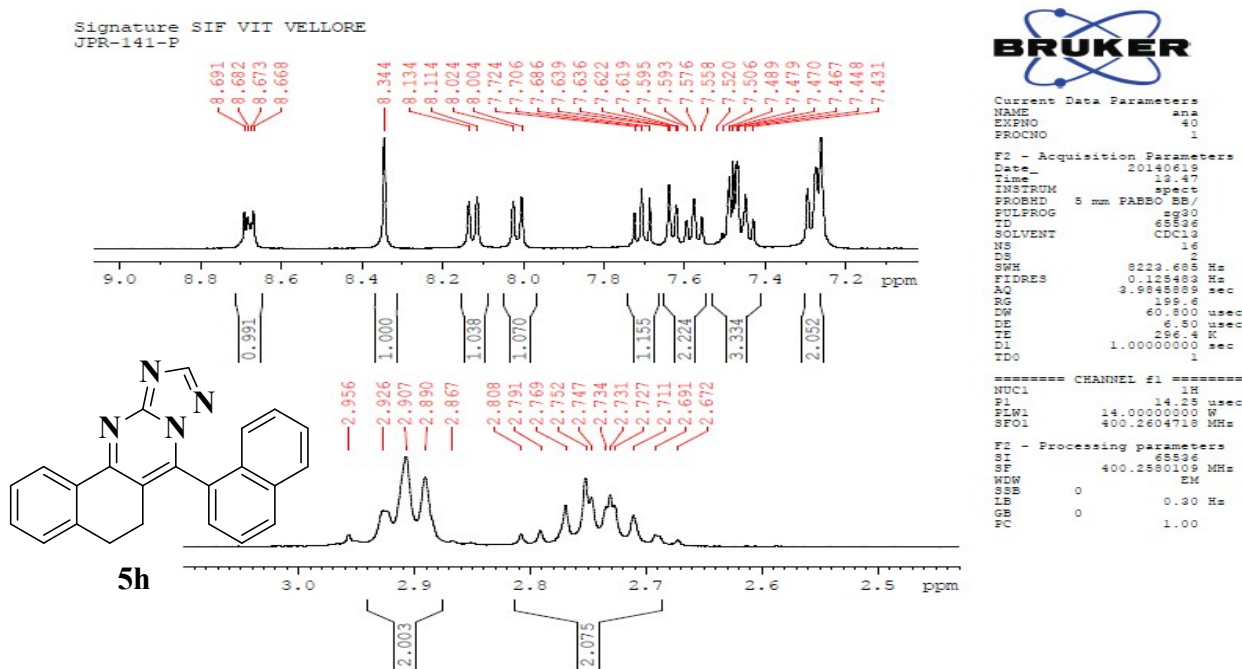

### <sup>13</sup>C NMR spectrum of compound (5h):

Signature SIF VIT VELLORE  
JPR-141-P

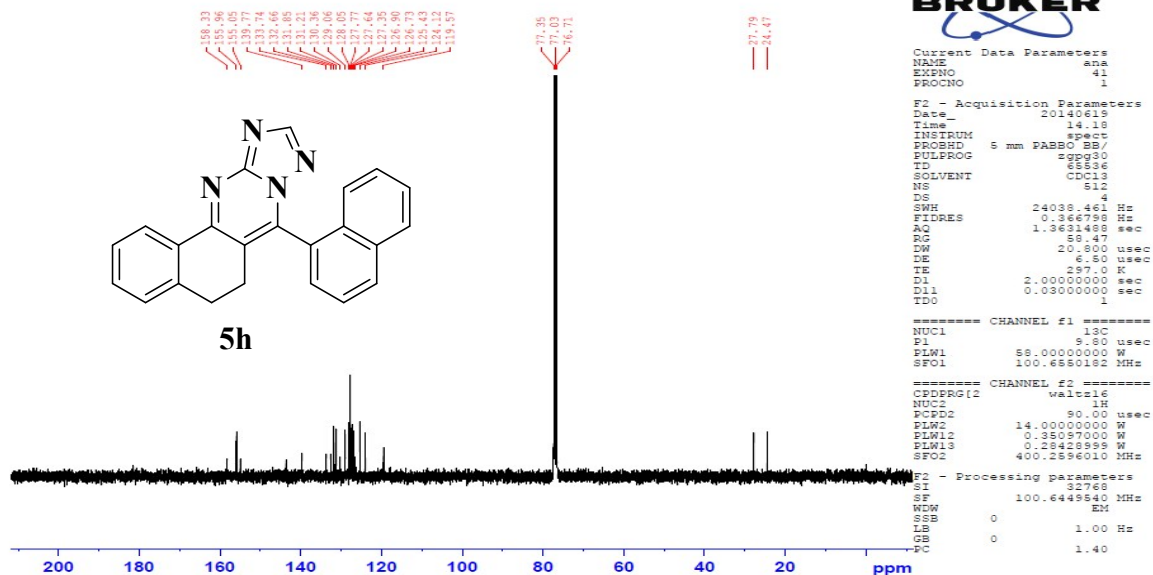

### HRMS spectrum of compound (5h):

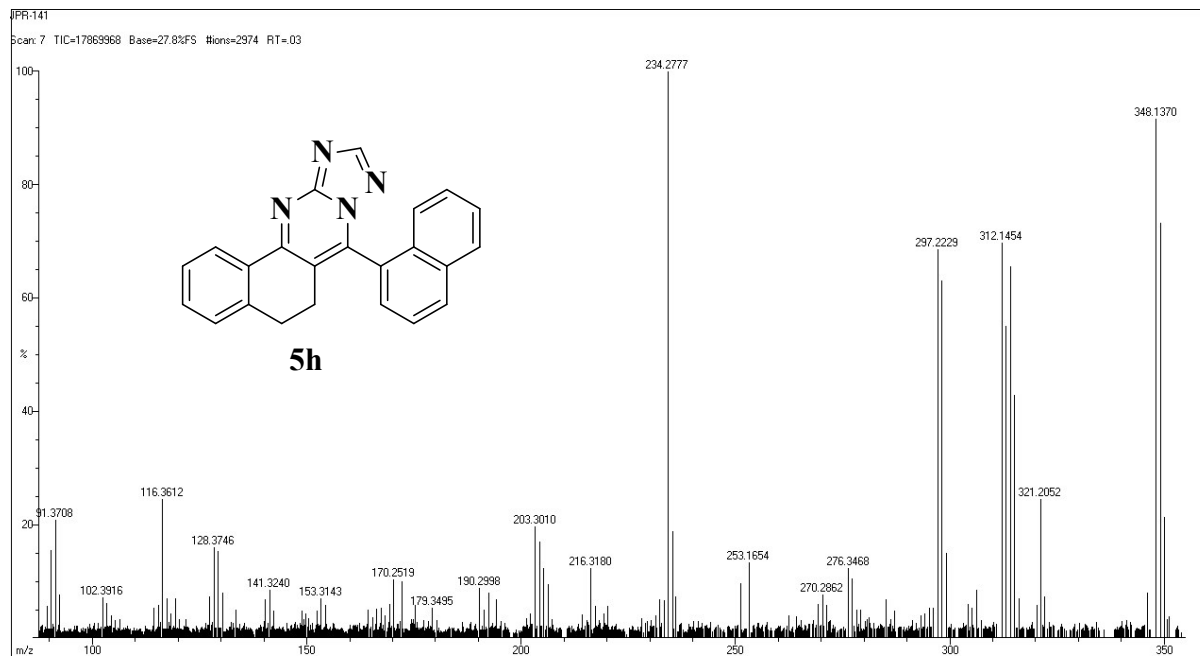

# <sup>1</sup>H NMR spectrum of compound (5i):

Signature SIF VIT VELLORE  
JPR-088-P

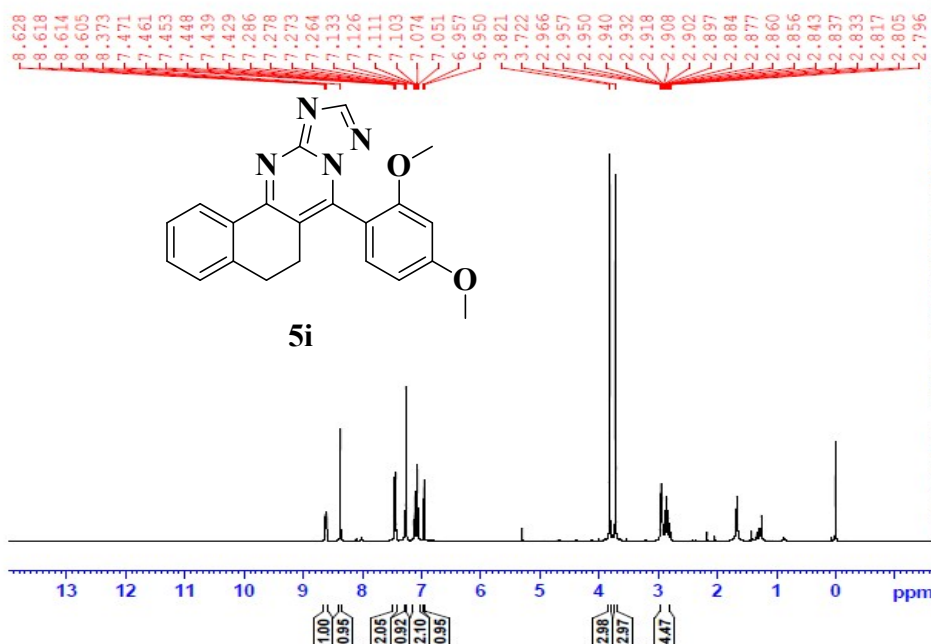

# Expanded <sup>1</sup>H NMR spectrum of compound (5i):

Signature SIF VIT VELLORE  
JPR-088-P

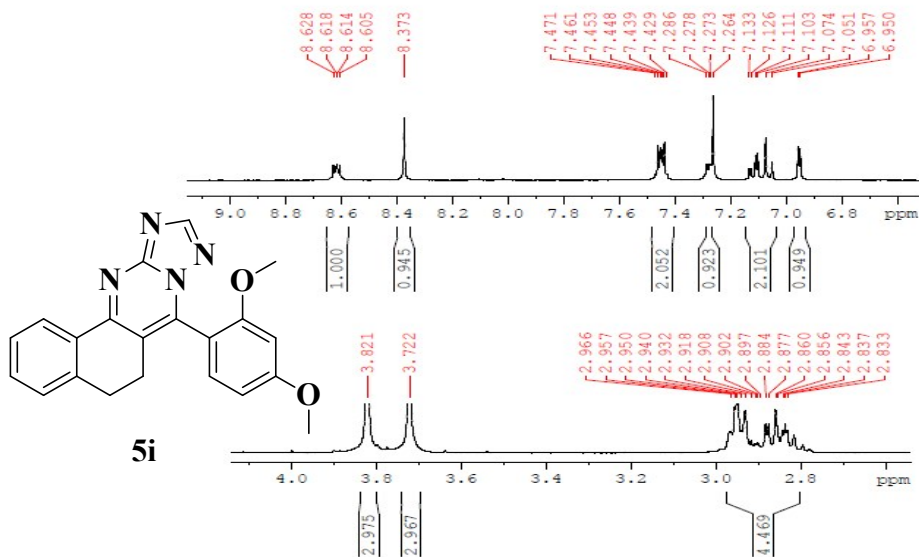

### <sup>13</sup>C NMR spectrum of compound (5i):

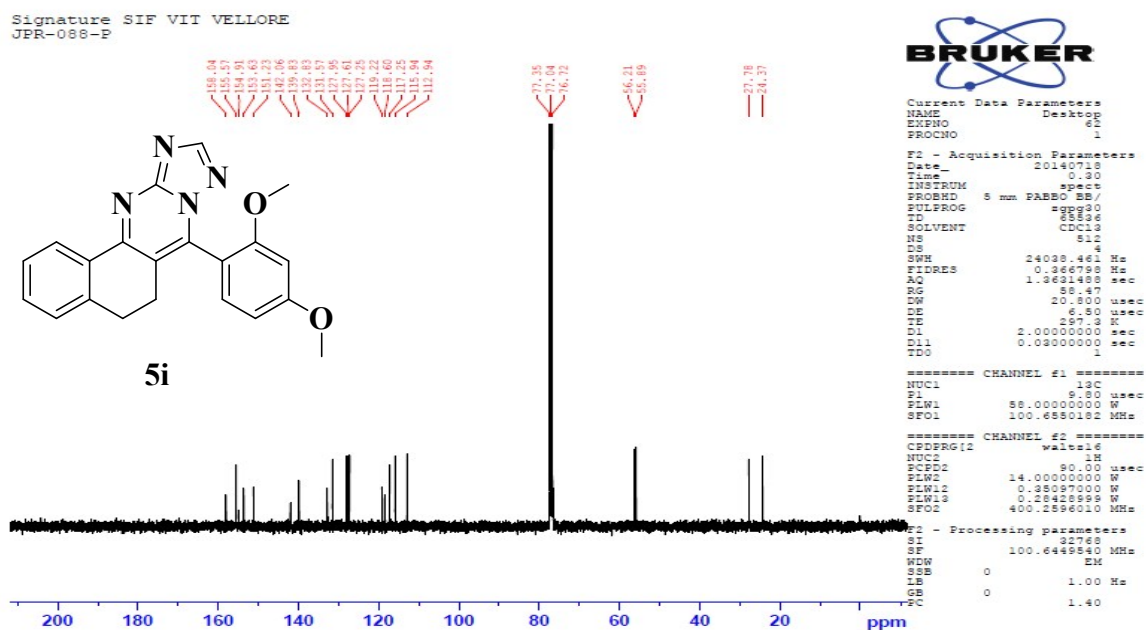

### HRMS spectrum of compound (5i):

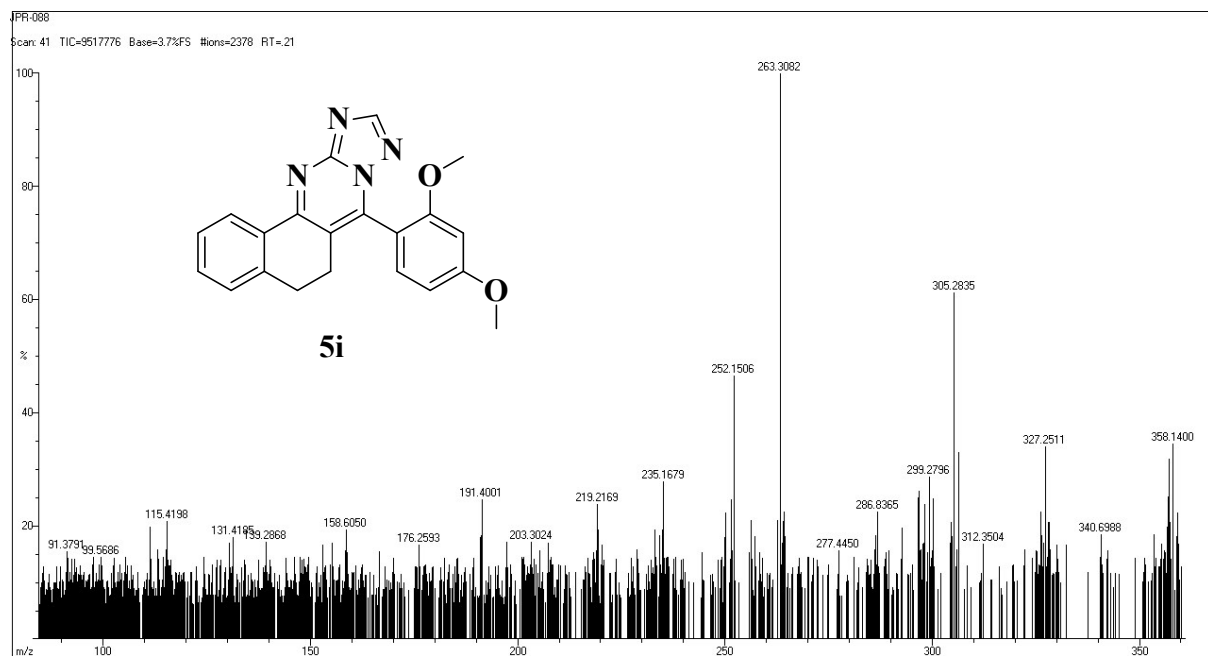

# <sup>1</sup>H NMR spectrum of compound (5j):

Signature SIF VIT VELLORE  
JPR-089-P

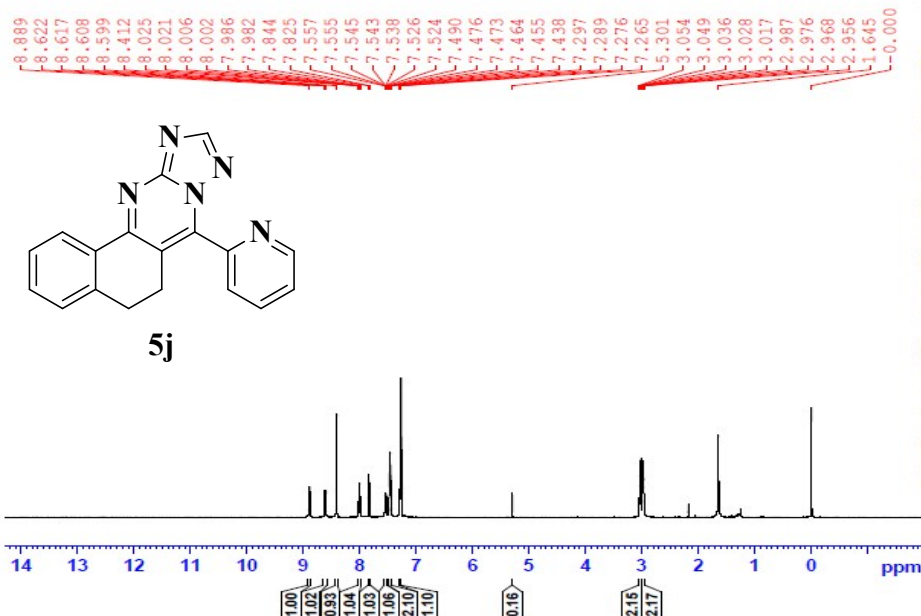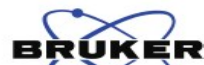

Current Data Parameters  
NAME Desktop  
EXPNO 65  
PROCNO 1

F2 - Acquisition Parameters  
Date\_ 20140718  
Time 16.48  
INSTRUM spect  
PROBHD 5 mm PABBO BB/  
PULPROG zgpg30  
TD 65536  
SOLVENT CDCl3  
DS 16  
DE 1  
SWH 823.688 Hz  
FIDRES 0.1125488 Hz  
AQ 3.984888 sec  
RG 199.6  
DM 60.800 usec  
HB 6.50 usec  
HT 228.8 Hz  
DI 1.00000000 sec  
TDO 1

===== CHANNEL f1 =====  
NUC1 1H  
P1 14.23 usec  
PLW1 14.00000000 W  
SFO1 400.2604718 MHz

F2 - Processing parameters  
SI 65536  
SF 400.2580096 MHz  
WDW EM  
SS 0  
LB 0.30 Hz  
GB 0  
PC 1.00

# Expanded <sup>1</sup>H NMR spectrum of compound (5j):

Signature SIF VIT VELLORE  
JPR-089-P

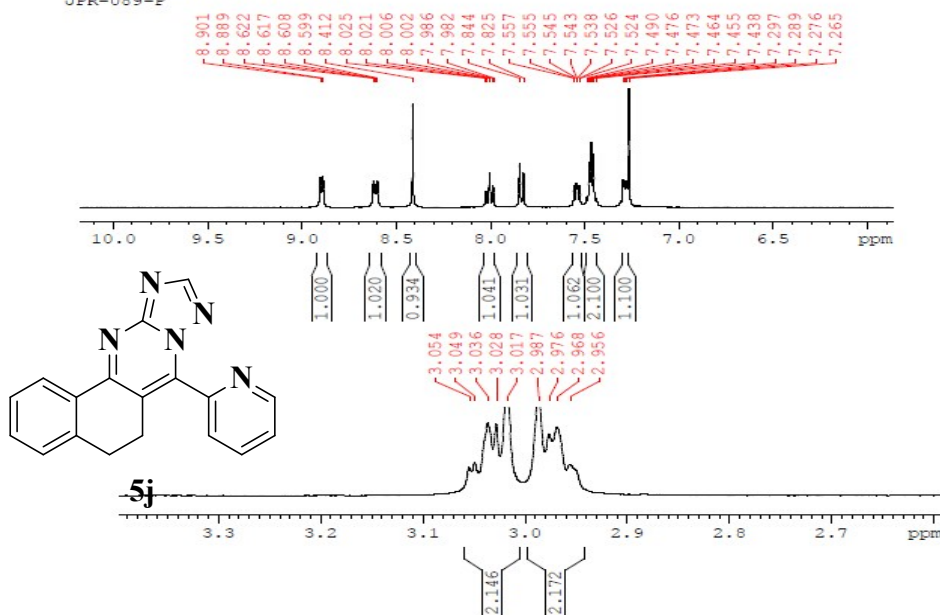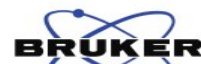

Current Data Parameters  
NAME Desktop  
EXPNO 65  
PROCNO 1

F2 - Acquisition Parameters  
Date\_ 20140718  
Time 16.48  
INSTRUM spect  
PROBHD 5 mm PABBO BB/  
PULPROG zgpg30  
TD 65536  
SOLVENT CDCl3  
DS 16  
DE 1  
SWH 823.688 Hz  
FIDRES 0.1125488 Hz  
AQ 3.984888 sec  
RG 199.6  
DM 60.800 usec  
HB 6.50 usec  
HT 228.8 Hz  
DI 1.00000000 sec  
TDO 1

===== CHANNEL f1 =====  
NUC1 1H  
P1 14.23 usec  
PLW1 14.00000000 W  
SFO1 400.2604718 MHz

F2 - Processing parameters  
SI 65536  
SF 400.2580096 MHz  
WDW EM  
SS 0  
LB 0.30 Hz  
GB 0  
PC 1.00

### <sup>13</sup>C NMR spectrum of compound (5j):

Signature SIF VIT VELLORE  
JPR-089-P

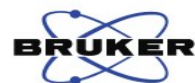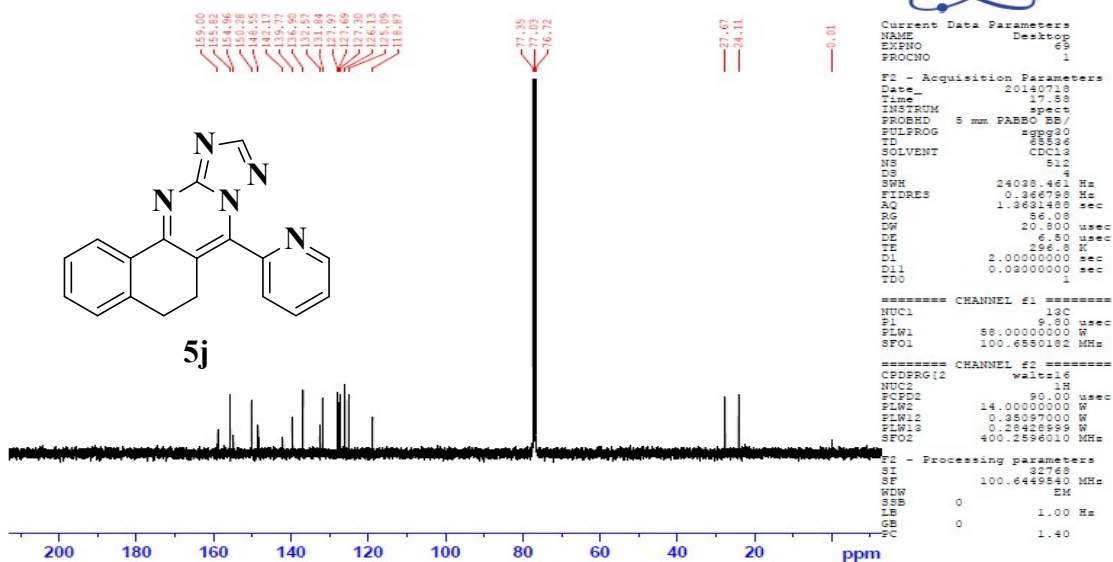

### HRMS spectrum of compound (5j):

JPR-089

Scan: 3 TIC=18187440 Base=14.13FS #Ions=3586 RT=01

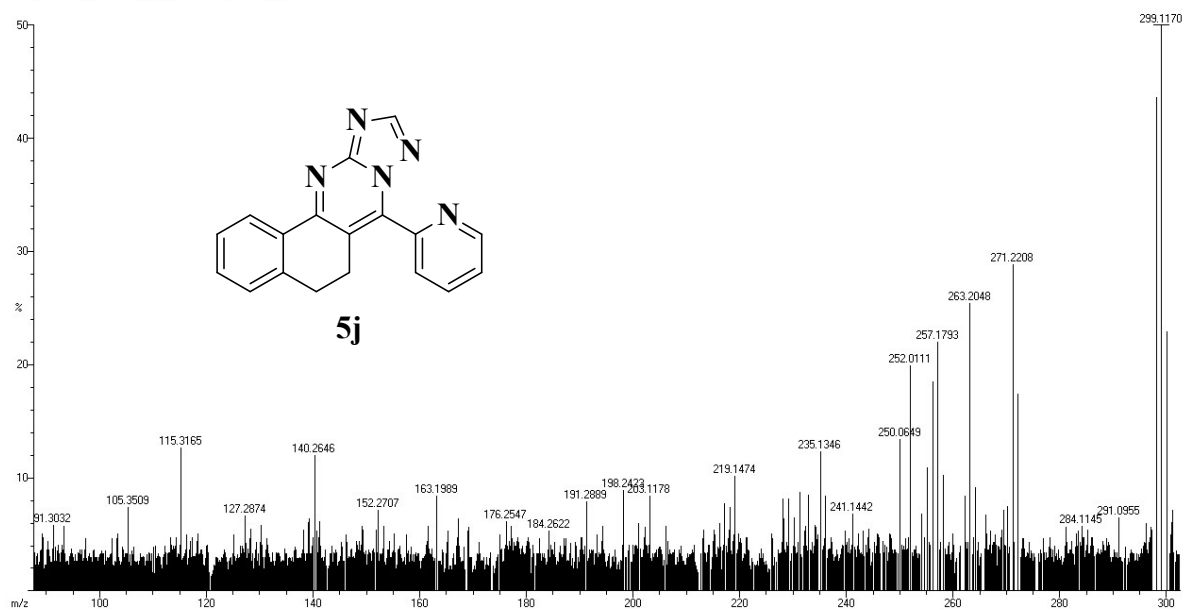

# <sup>1</sup>H NMR spectrum of compound (5k):

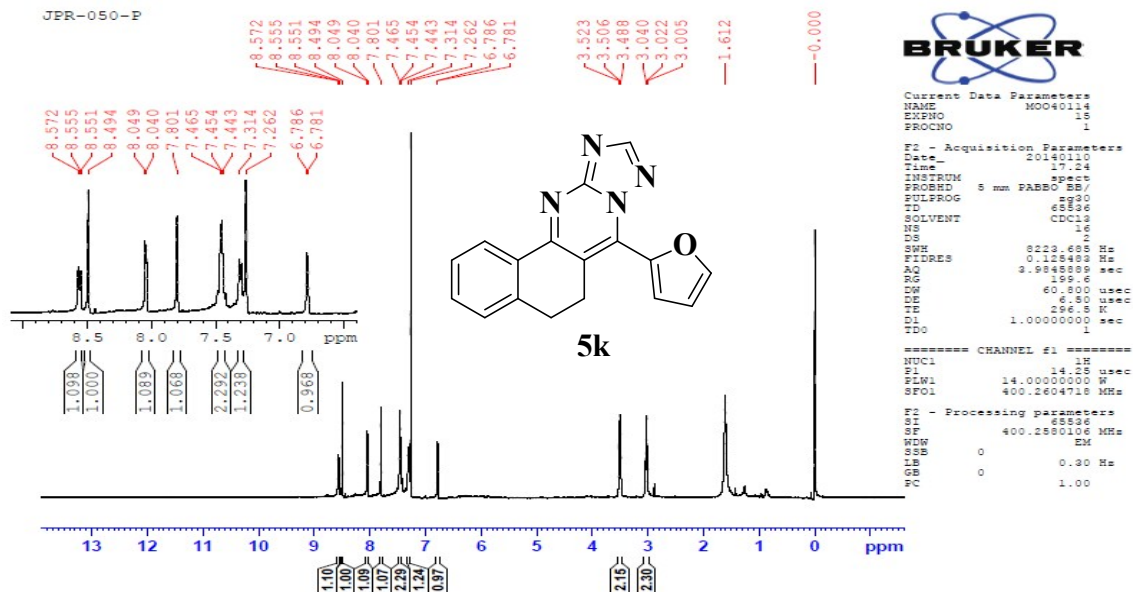

# <sup>13</sup>C NMR spectrum of compound (5k):

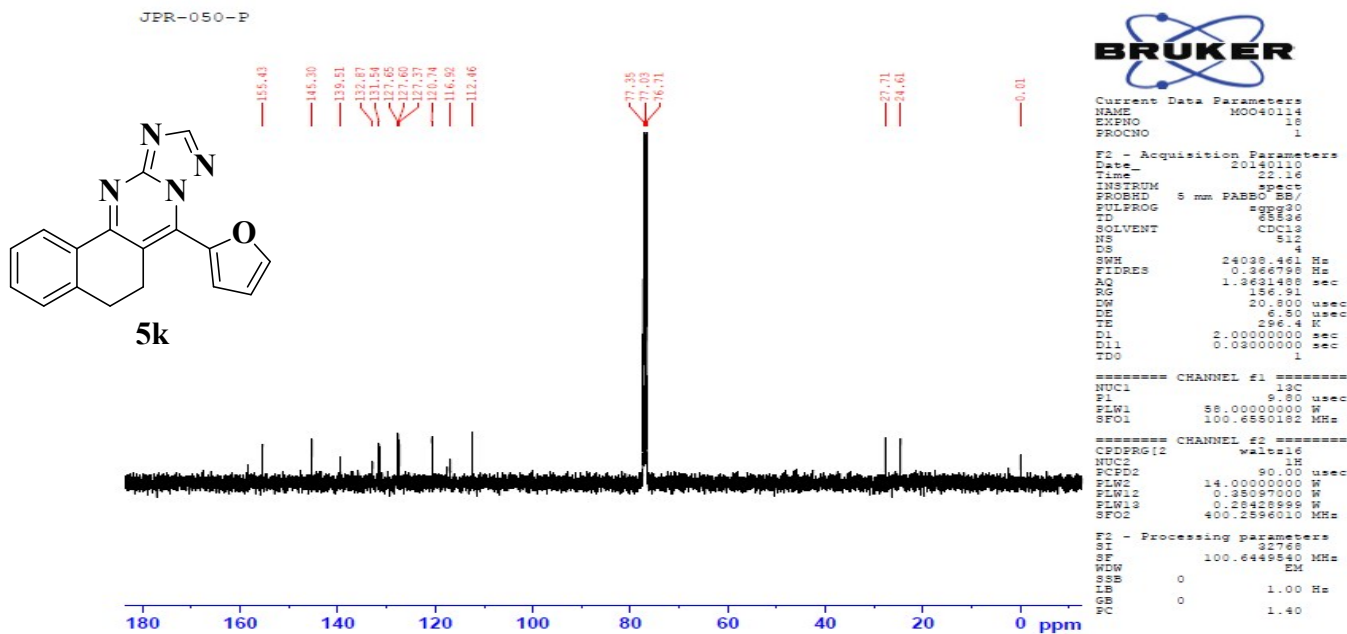

## HRMS spectrum of compound (5k):

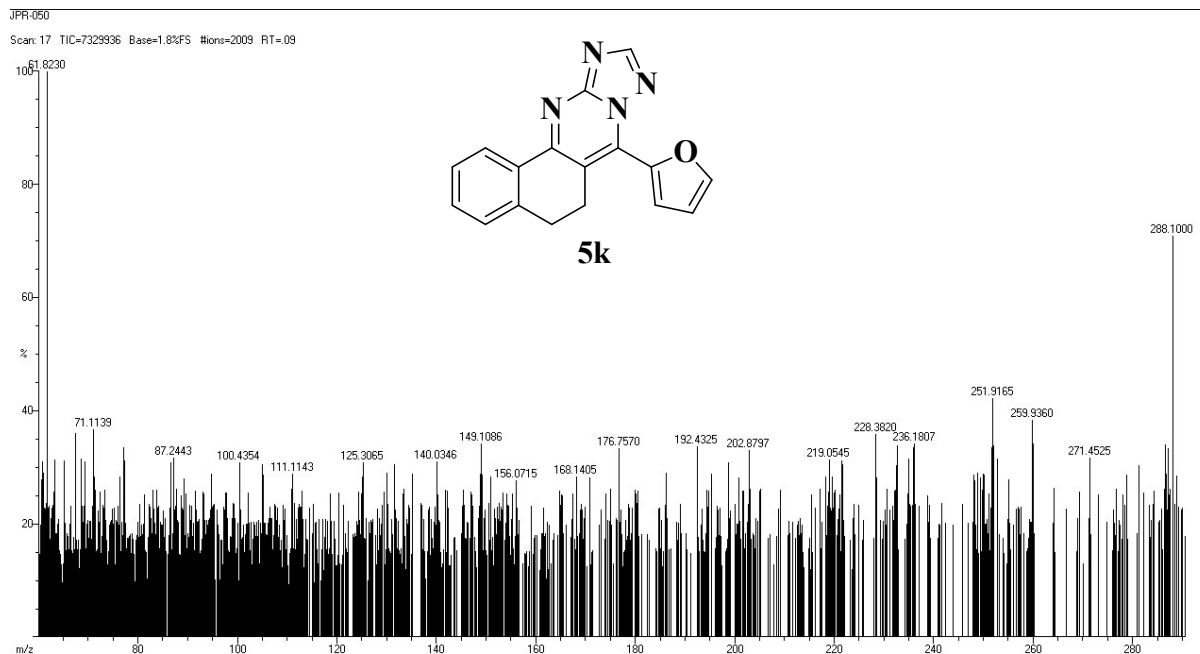

## <sup>1</sup>H NMR spectrum of compound (5l):

Signature SIF VIT VELLORE  
JPR-124-P

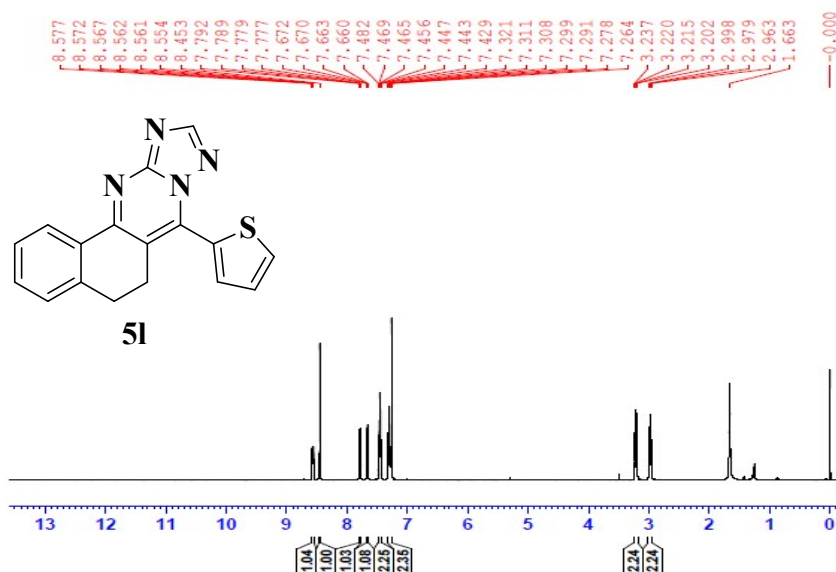

**BRUKER**

```

Current Data Parameters
NAME          analy
EXPNO         1
PROCNO        1

F2 - Acquisition Parameters
Date_         20140609
Time          17.26
INSTRUM       spect
PROBHD        5 mm F4BBO BB/
PULPROG       zgpg30
TD            65536
SOLVENT       CDCl3
NS            1638
DS            4
SWH           8220.685 Hz
FIDRES        0.128863 Hz
AQ            9.984888 sec
RG            199.6
DWM           60.800 usec
DE            6.50 usec
TE            299.9 K
TD0           1.00000000 sec
TDO           1

===== CHANNEL f1 =====
NUC1          13C
P1            14.235 usec
PCW1          14.00000000 W
SFO1          400.2604718 MHz

F2 - Processing parameters
SI            65536
SF            400.2600098 MHz
WDW           EM
SSB           0
LB            0.30 Hz
GB            0
PC            1.00
    
```



## Expanded <sup>1</sup>H NMR spectrum of compound (51):

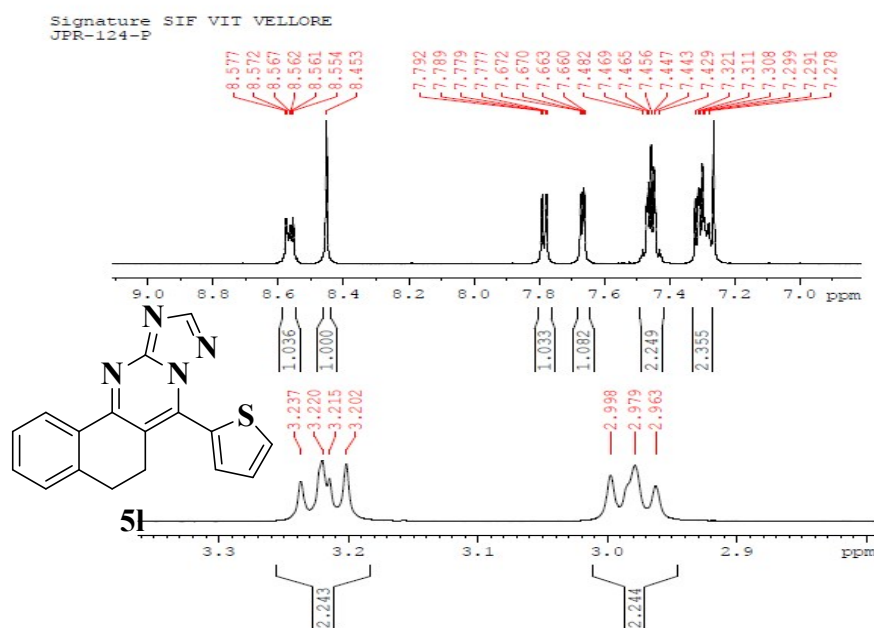

**BRUKER**

```
Current Data Parameters
NAME analy
EXPNO 1
PROCNO 1

F2 - Acquisition Parameters
Date_ 20140609
Time 17.28
INSTRUM spect
PROBHD 5 mm PABBO BB/
PULPROG zgpg30
TD 65536
SOLVENT CDCl3
NS 4
DS 4
SWH 8223.65558 Hz
AQ 0.2484433 sec
FIDRES 199.06
AQRES 6.800 usec
SFO1 400.2580052 MHz
TDO 1.000000000 sec
TD0 1
```

```
===== CHANNEL f1 =====
NUC1 1H
P1 14.00000000 usec
PL1 0.00000000 W
SFO1 400.2580052 MHz

F - Processing parameters
SFO 400.2580052 MHz
WDW EM
SSB 0
GB 0.20 Hz
CB 0
PC 1.00
```

## <sup>13</sup>C NMR spectrum of compound (51):

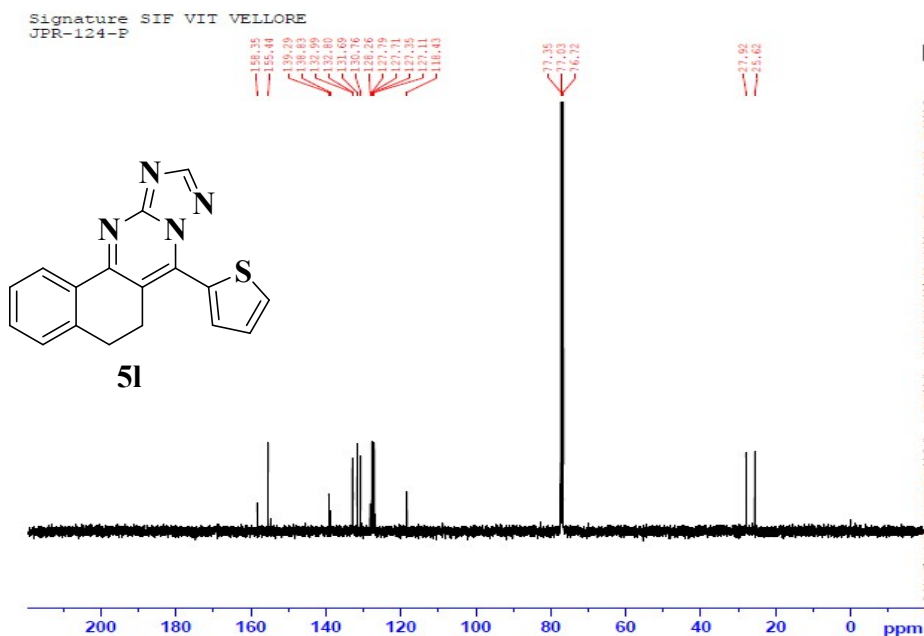

**BRUKER**

```
Current Data Parameters
NAME analy
EXPNO 1
PROCNO 1

F2 - Acquisition Parameters
Date_ 20140609
Time 22.29
INSTRUM spect
PROBHD 5 mm PABBO BB/
PULPROG zgpg30
TD 65536
SOLVENT CDCl3
NS 4
DS 4
SWH 24038.461 Hz
AQ 0.36679 Hz
FIDRES 1.3631458 sec
SFO1 100.6281192 MHz

===== CHANNEL f1 =====
CPDPRG12 waltz16
NUC1 13C
P1 90.00 usec
PL1 0.00000000 W
SFO1 100.6281192 MHz

===== CHANNEL f2 =====
CPDPRG12 waltz16
NUC2 1H
P2 90.00 usec
PL2 0.00000000 W
SFO2 400.2580052 MHz
TDO 0.030000000 sec
TD0 1
```

```
- Processing parameters
SFO 100.6281192 MHz
WDW EM
SSB 0
GB 1.00 Hz
CB 0
PC 1.40
```

## HRMS spectrum of compound (5l):

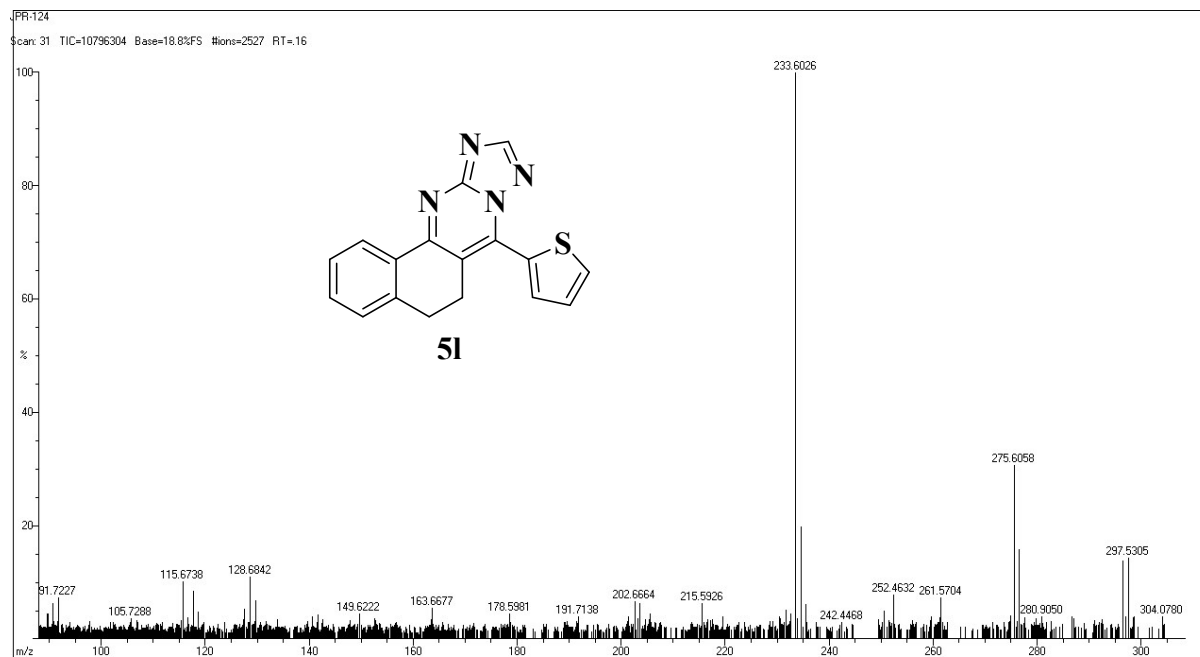

## <sup>1</sup>H NMR spectrum of compound (5m):

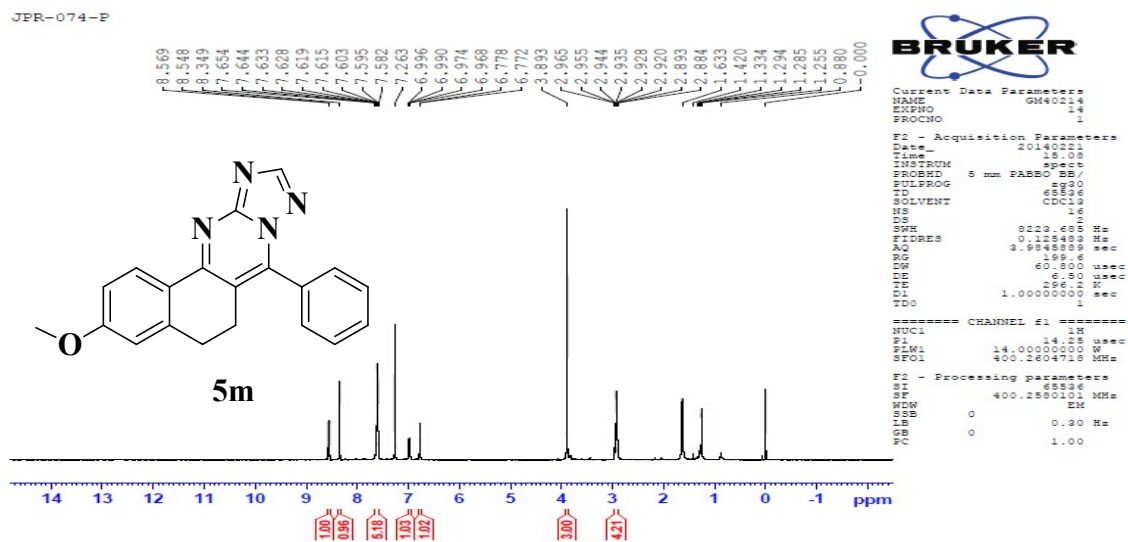



## HRMS spectrum of compound (5m):

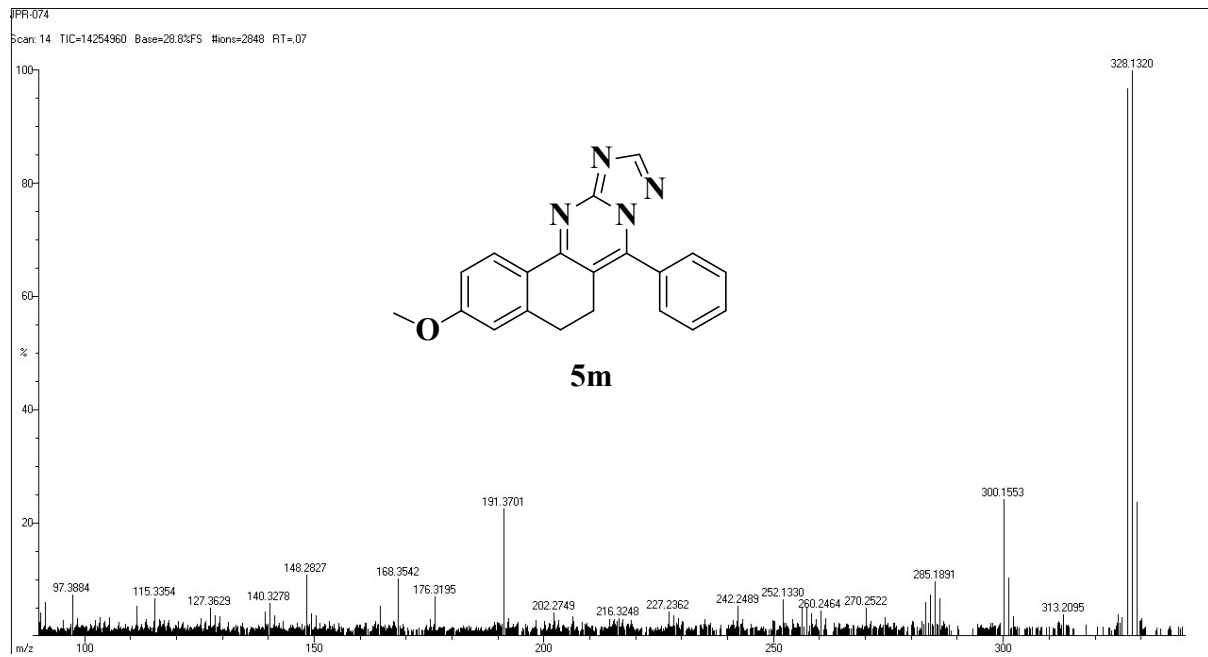

## <sup>1</sup>H NMR spectrum of compound (5m):

Signature SIF VIT VELLORE  
JPR-093-P

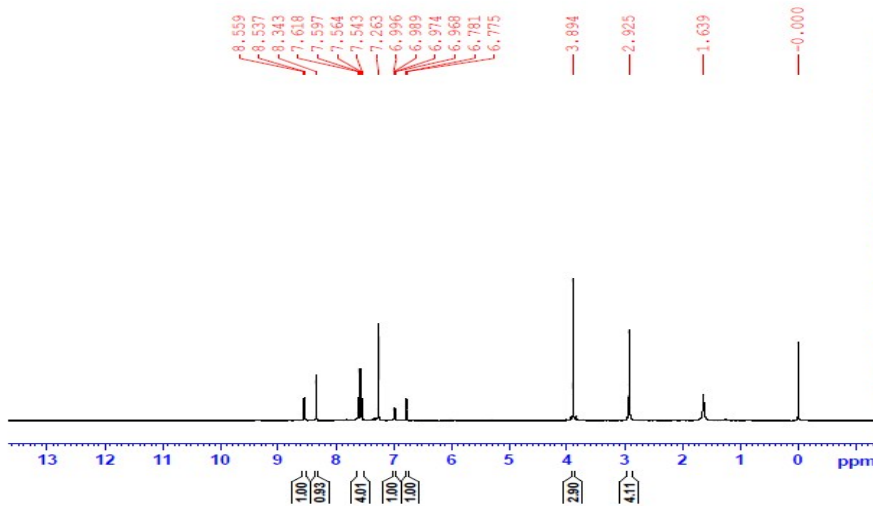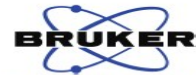

Current Data Parameters  
NAME Desktop  
EXPNO 9  
PROCNO 1

F2 - Acquisition Parameters  
Date\_ 20140704  
Time 15:09  
INSTRUM spect  
PROBHD 5 mm F4BBO  
PULPROG zgpg30  
FILTROG CM30  
SOLVENT CDCl3  
NS 640  
DS 4  
SWH 8223.6 MHz  
FIDRES 0.1024003 MHz  
AQ 0.9888000 sec  
RG 655  
PC 1.99 sec  
LUMS 60.8000 usec  
SFO1 400.1464000 MHz  
NUC1 13C  
NUC2 13C  
P1 1.0000000 sec  
P2 0.0000000 sec  
P3 0.0000000 sec

===== CHANNEL f1 =====  
NUC1 13C  
P1 1.0000000 sec  
SFO1 101.6261260 MHz  
SFO2 400.2604718 MHz

F2 - Processing parameters  
WDWEM 64  
SSB 0  
GB 0  
PC 1.99 sec  
SFO1 400.2604718 MHz  
EM 0  
WDW 0  
SSB 0  
GB 0  
PC 1.99 sec  
SFO1 400.2604718 MHz  
EM 0  
WDW 0  
SSB 0  
GB 0  
PC 1.99 sec  
SFO1 400.2604718 MHz  
EM 0

### Expanded <sup>1</sup>H NMR spectrum of compound (5n):

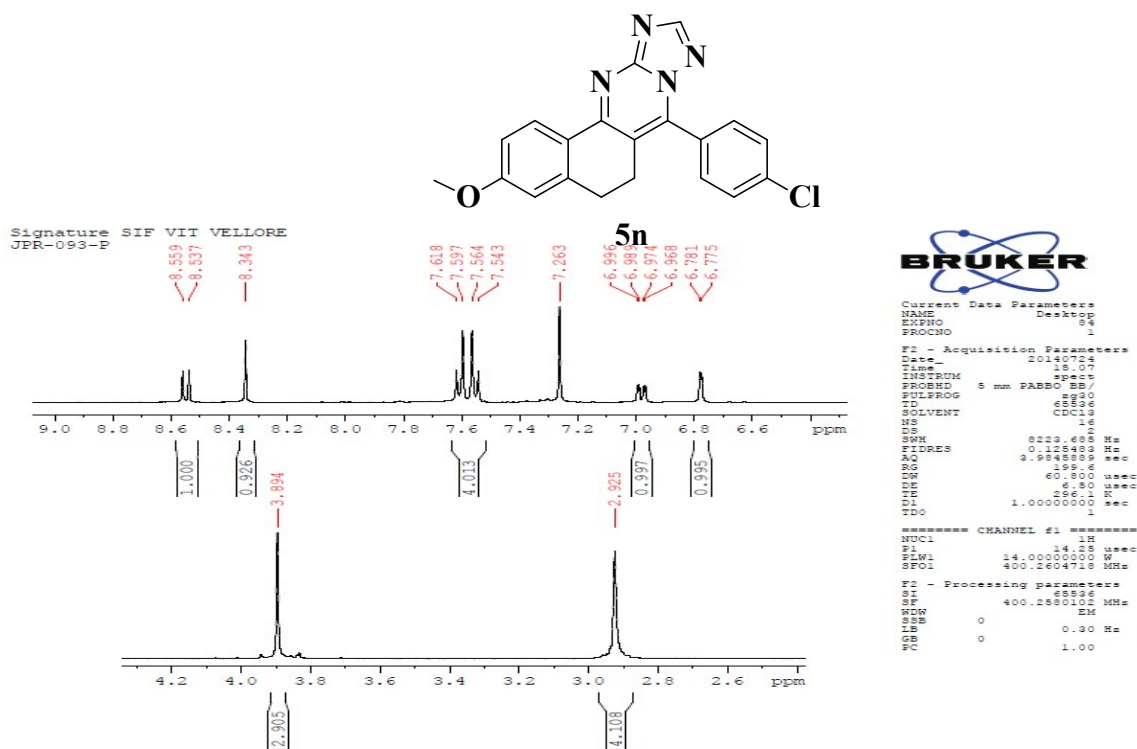

### <sup>13</sup>C NMR spectrum of compound (5n):

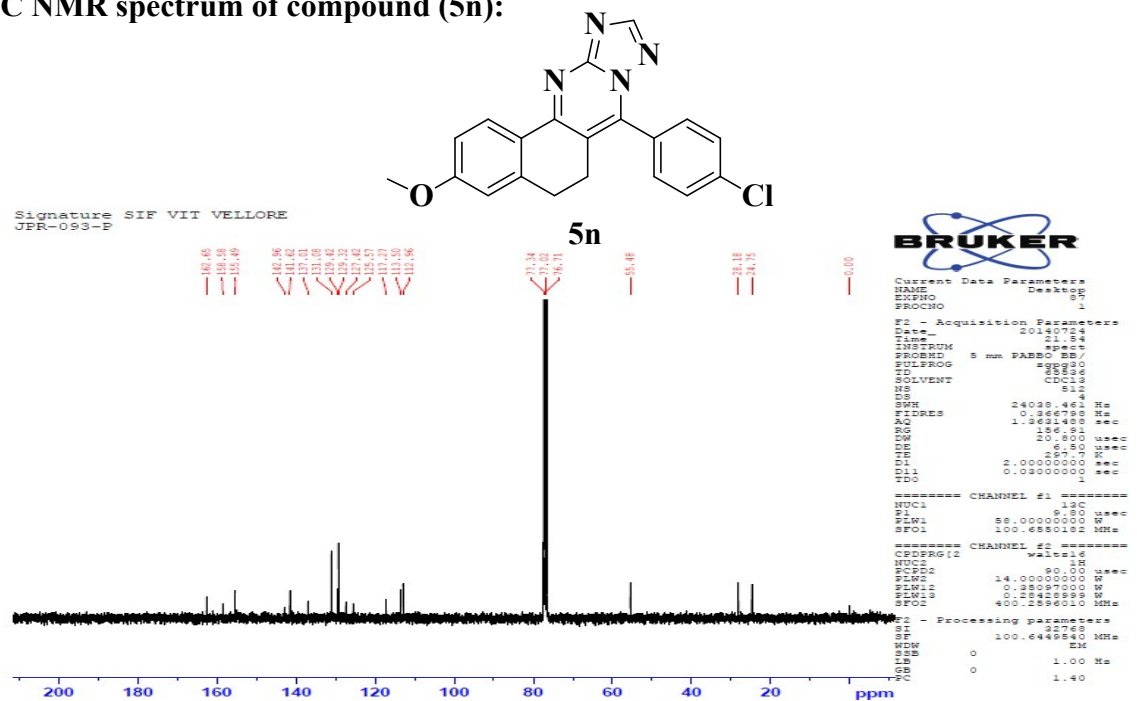



### Expanded <sup>1</sup>H NMR spectrum of compound (50):

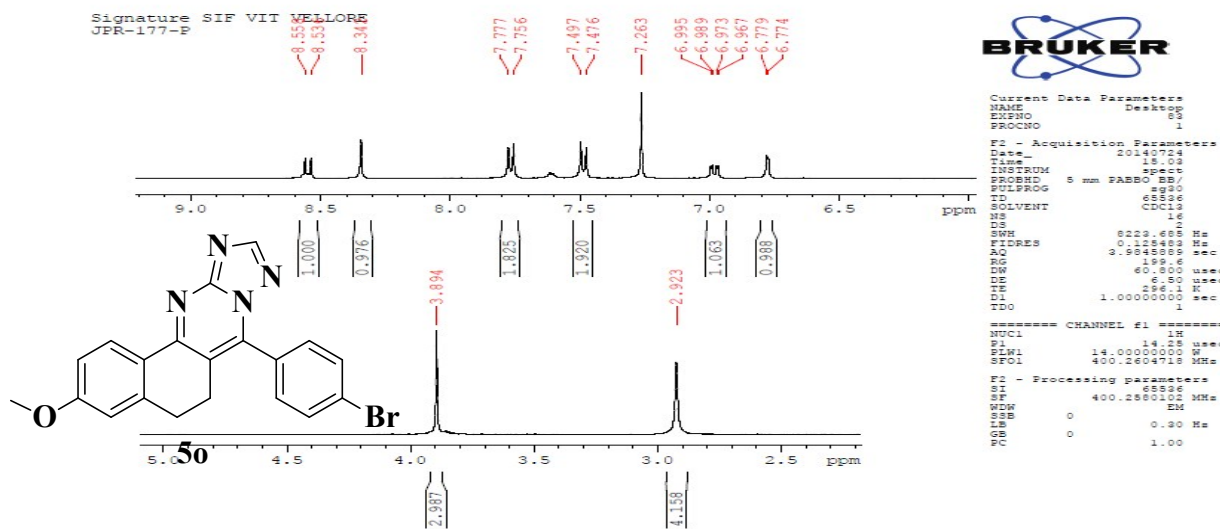

### <sup>13</sup>C NMR spectrum of compound (50):

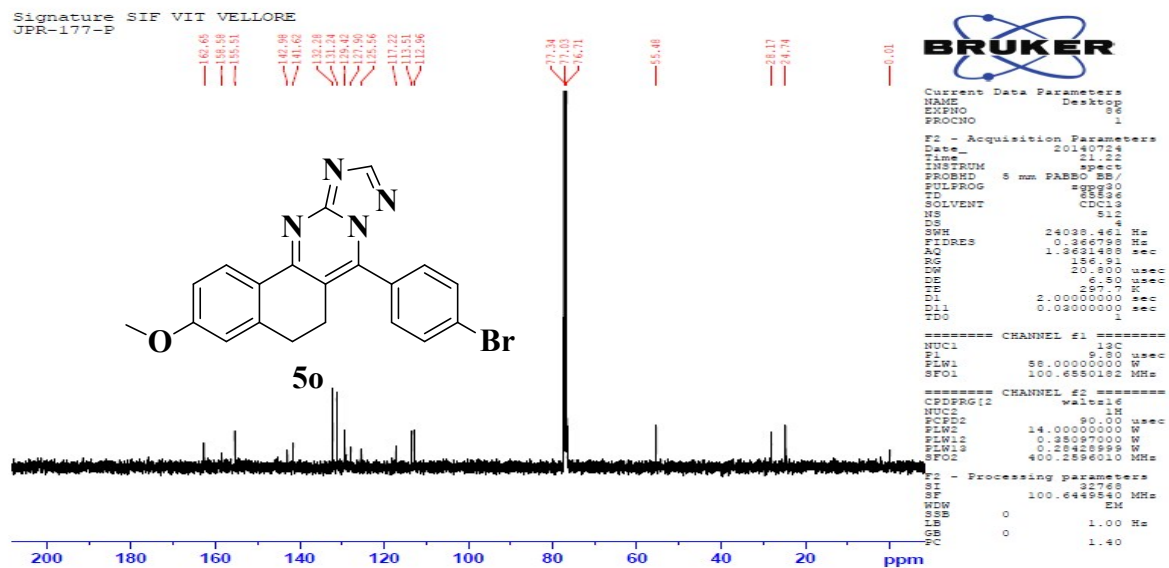

## HRMS spectrum of compound (5o):

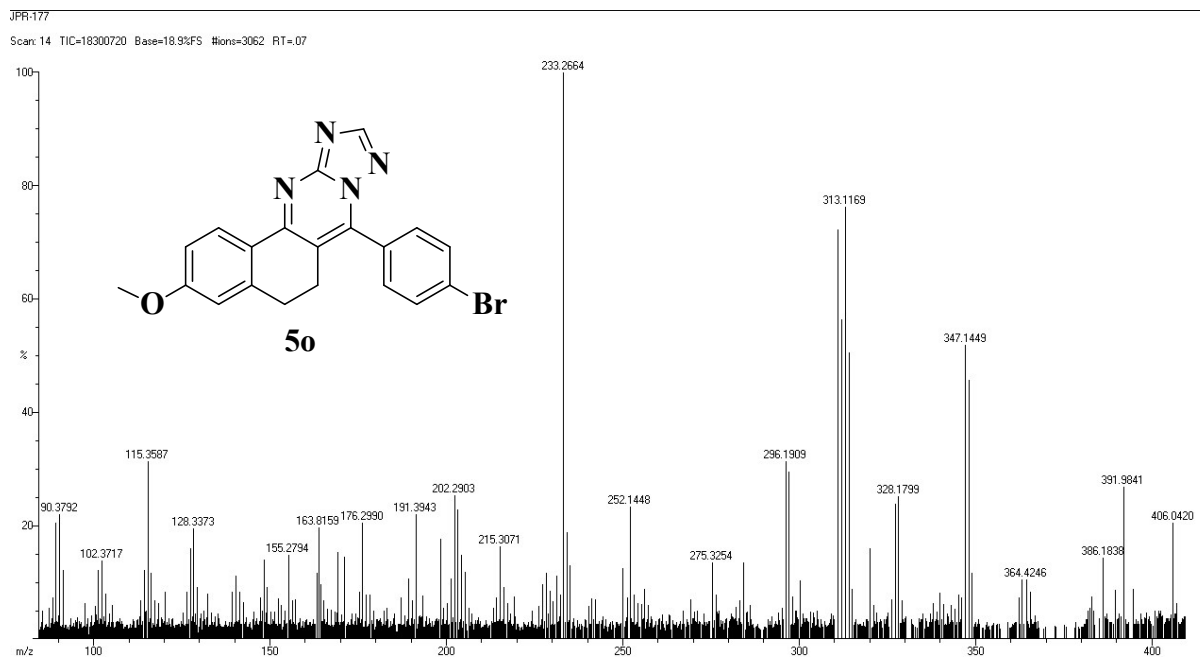

## <sup>1</sup>H NMR spectrum of compound (5p):

Signature SIF VIT VELLORE  
JPR-180-P

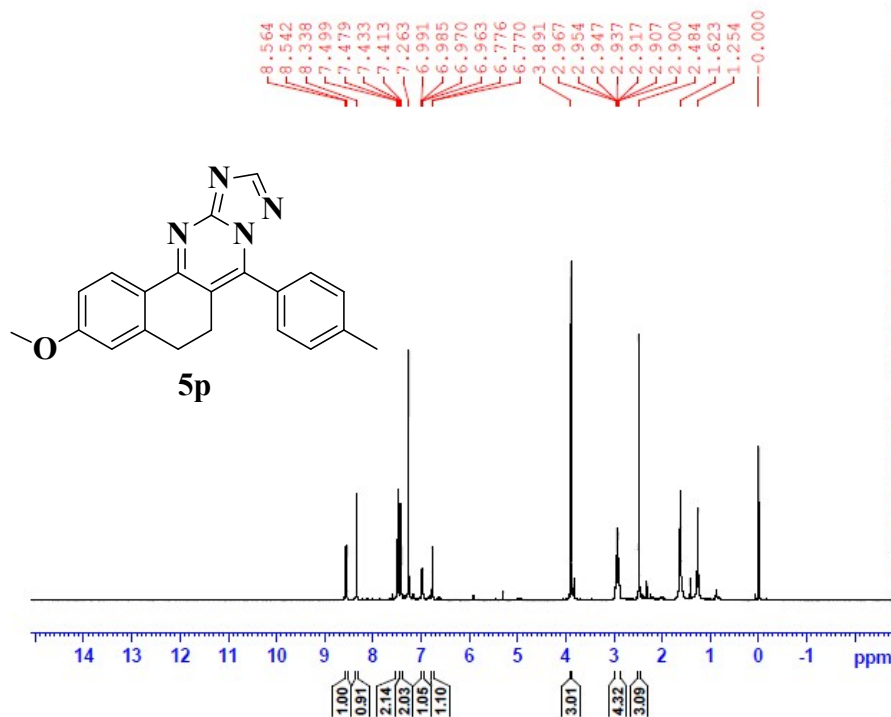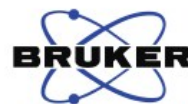

Current Data Parameters  
NAME Desktop  
EXPNO 9  
PROCNO 1

F2 - Acquisition Parameters  
Date\_ 20140808  
Time\_ 16.05  
INSTRUM spect  
PROBHD 5 mm PABBO BB/  
PULPROG zg30  
TD 65536  
SOLVENT CDCl3  
NS 16  
DS 2  
SWH 8223.688 Hz  
FIDRES 0.125488 Hz  
AQ 3.9849389 sec  
RG 199.6  
DW 60.800 usec  
DE 6.50 usec  
TE 296.2 K  
D1 1.00000000 sec  
TDO 1

===== CHANNEL f1 =====  
NUC1 1H  
P1 14.25 usec  
PLW1 14.00000000 W  
SFO1 400.2604718 MHz

F2 - Processing parameters  
SI 65536  
SF 400.2580105 MHz  
WDW EM  
SSB 0  
LB 0.30 Hz  
GB 0  
PC 1.00



## Expanded <sup>1</sup>H NMR spectrum of compound (5p):

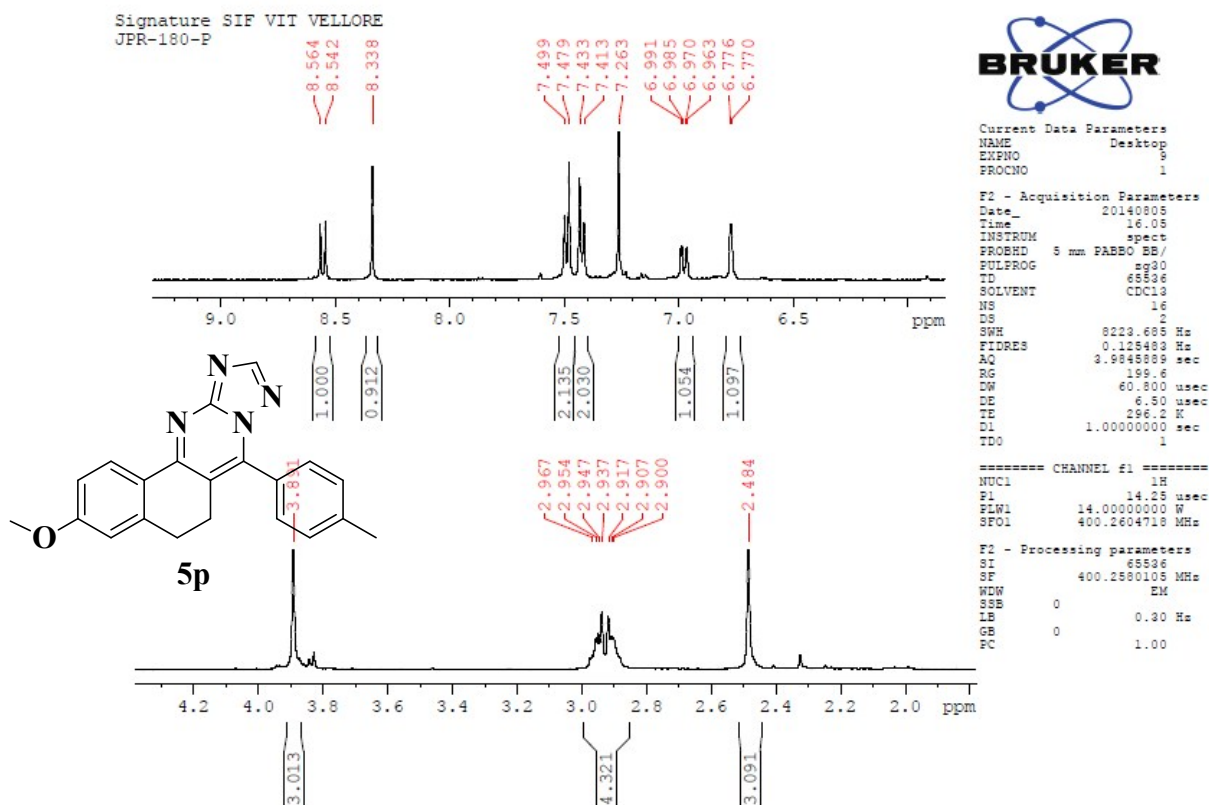

## <sup>13</sup>C NMR spectrum of compound (5p):

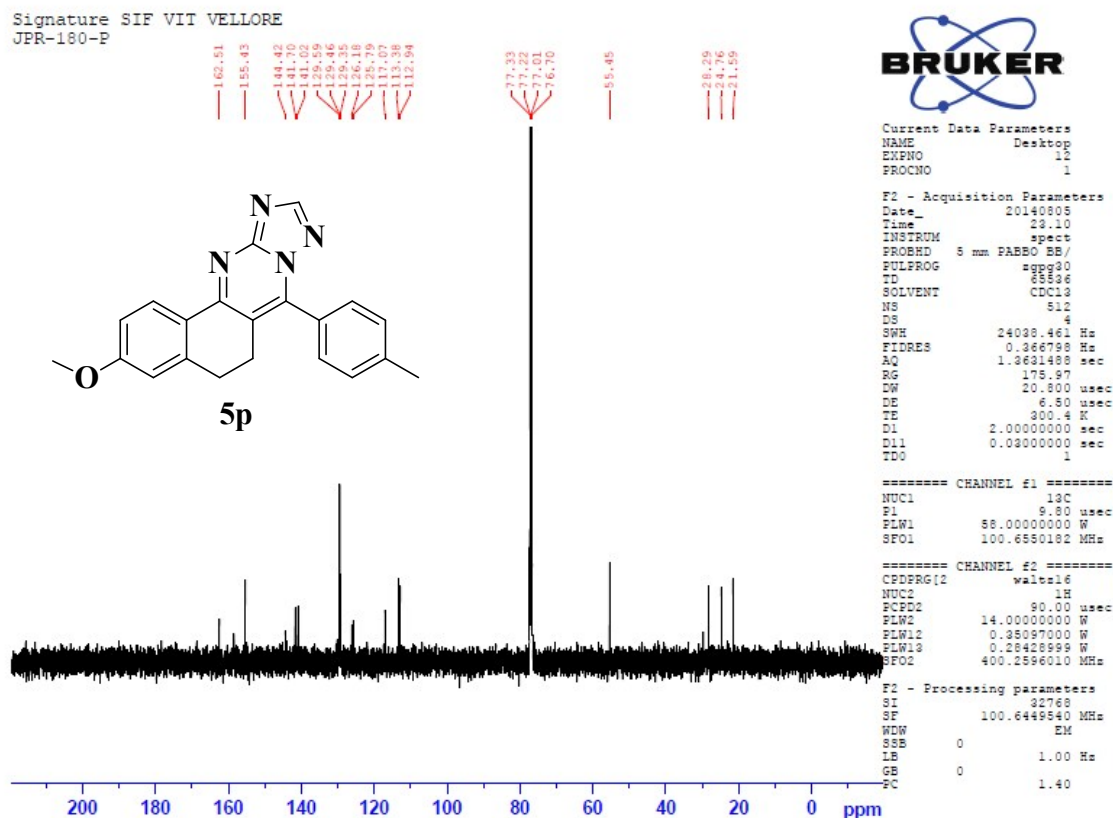

## HRMS spectrum of compound (5p):

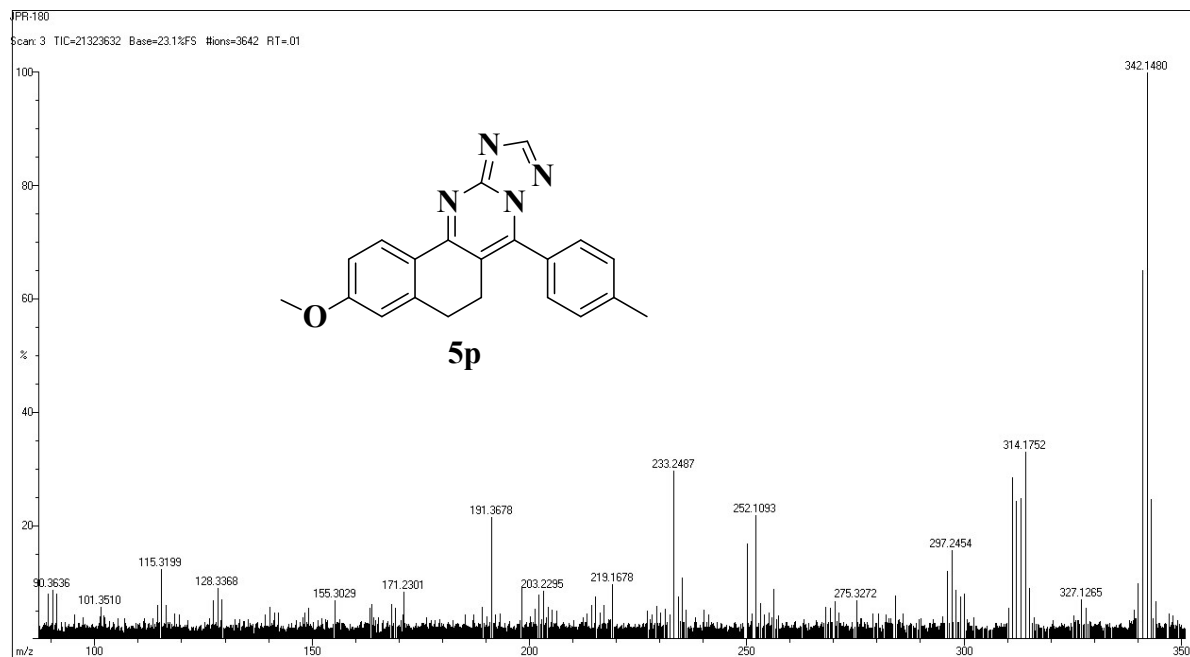

## <sup>1</sup>H NMR spectrum of compound (5q):

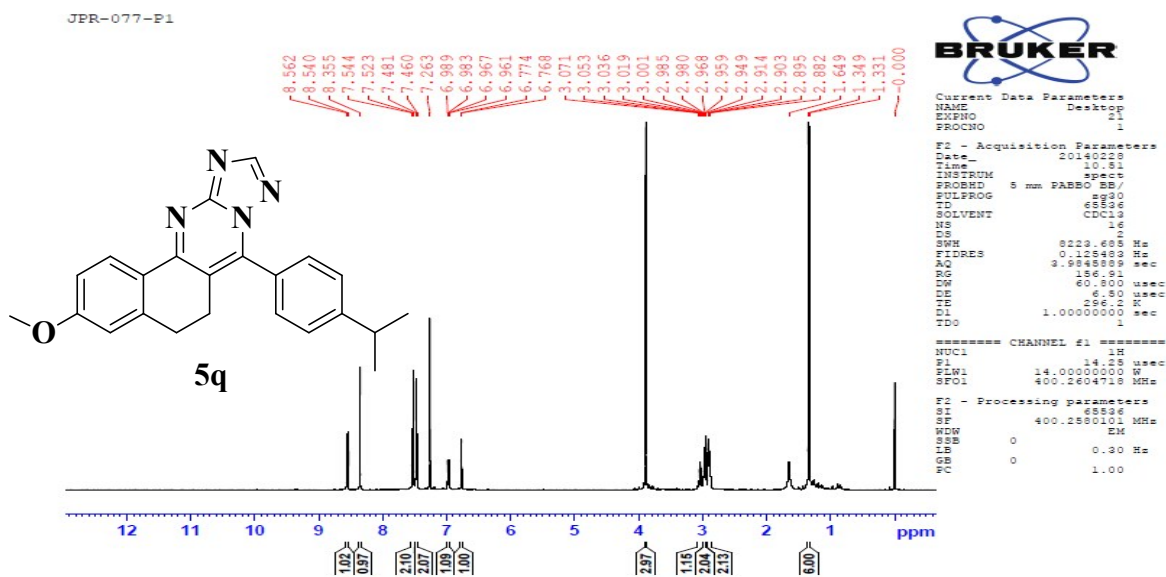

### Expanded <sup>1</sup>H NMR spectrum of compound (5q):

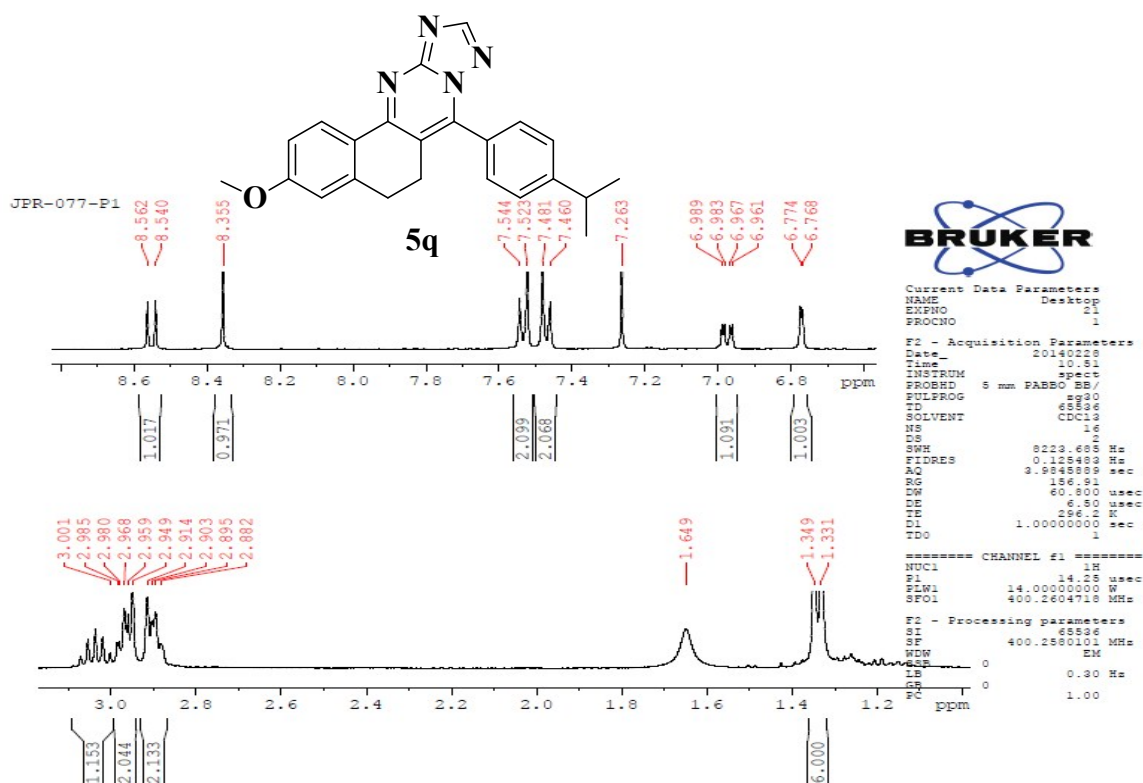

### <sup>13</sup>C NMR spectrum of compound (5q):

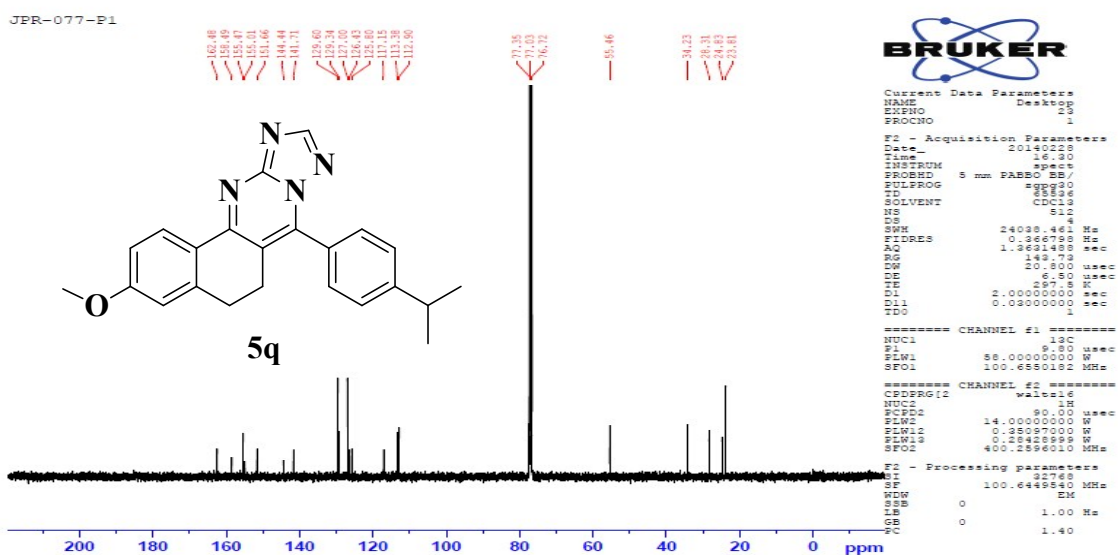

## HRMS spectrum of compound (5q):

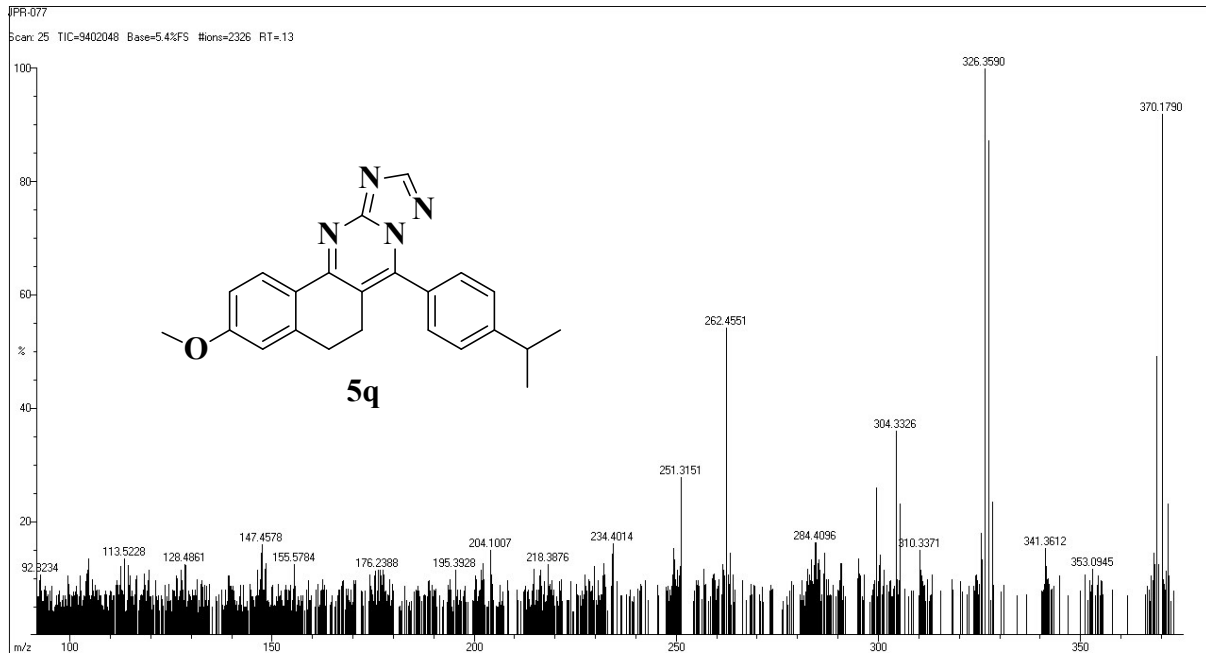

## <sup>1</sup>H NMR spectrum of compound (5r):

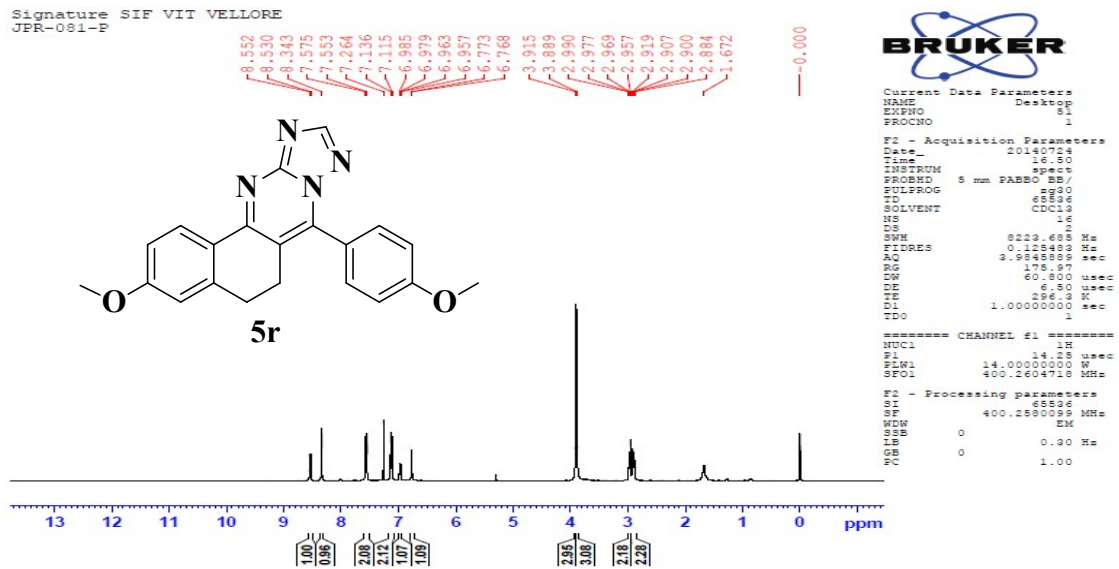

## Expanded <sup>1</sup>H NMR spectrum of compound (5r):

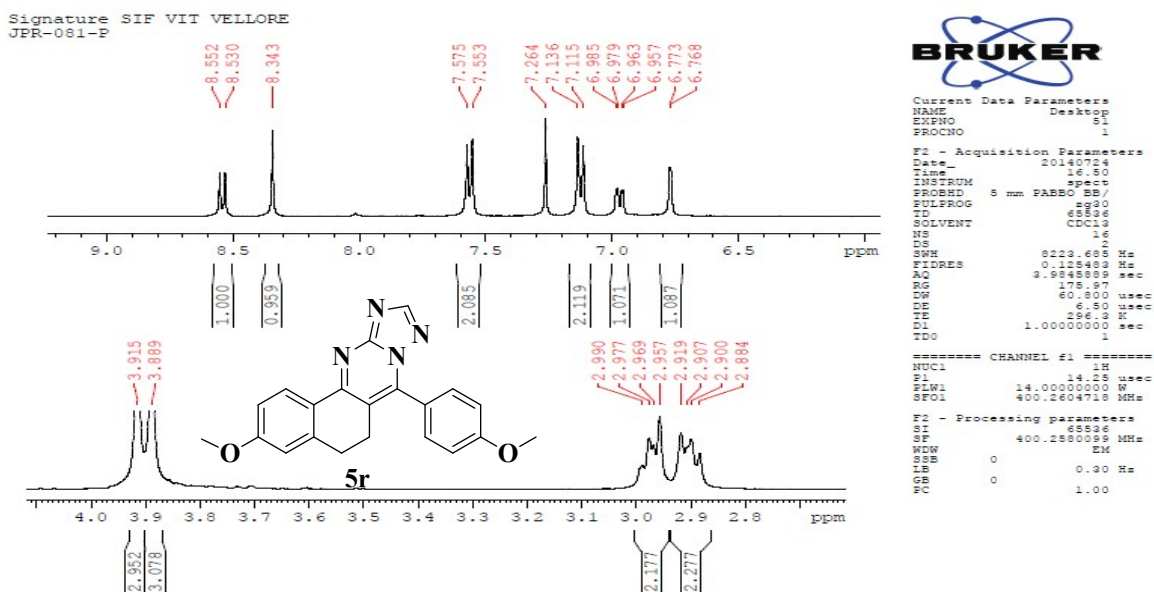

## <sup>13</sup>C NMR spectrum of compound (5r):

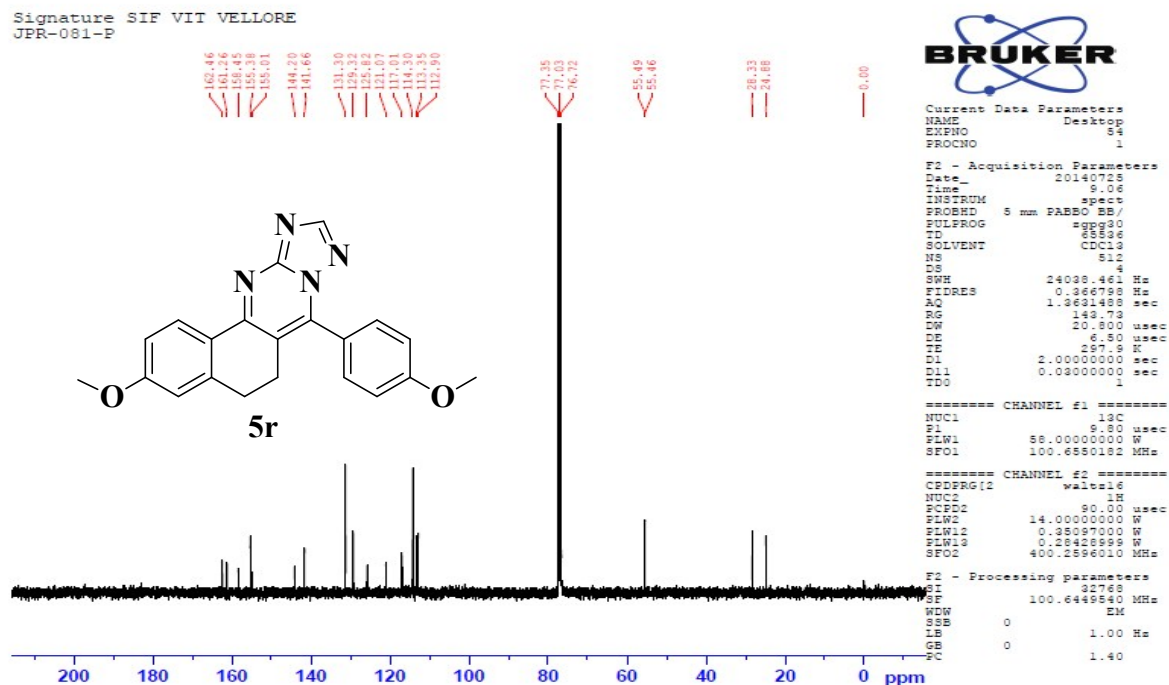

## HRMS spectrum of compound (5r):

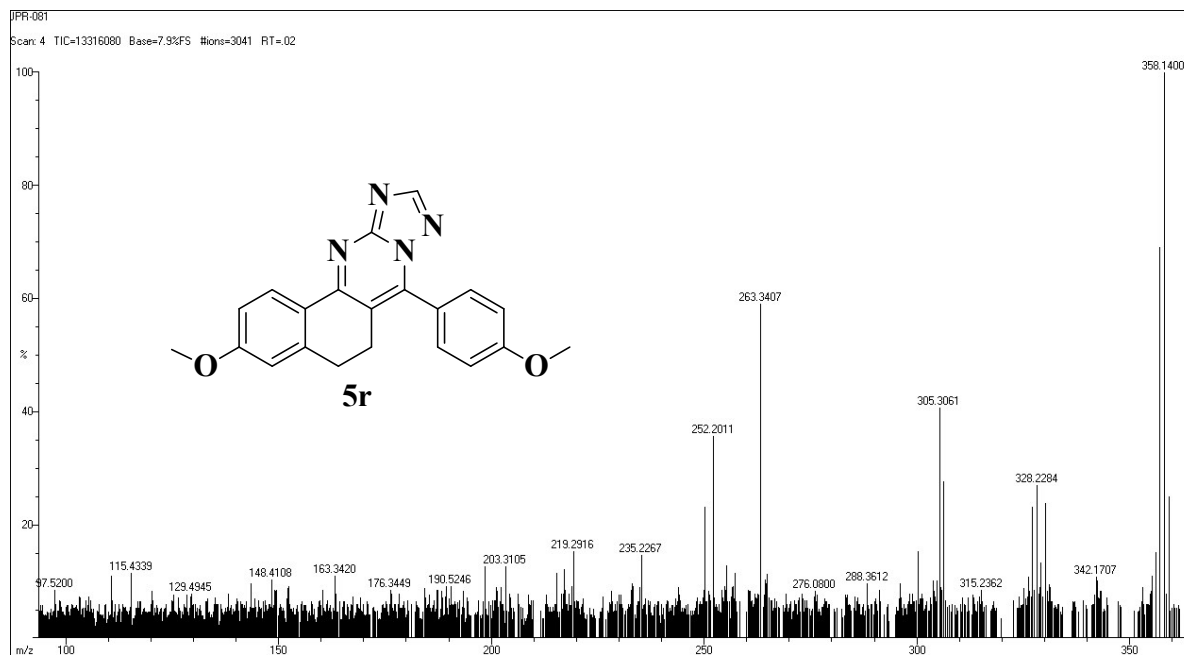

## <sup>1</sup>H NMR spectrum of compound (5s):

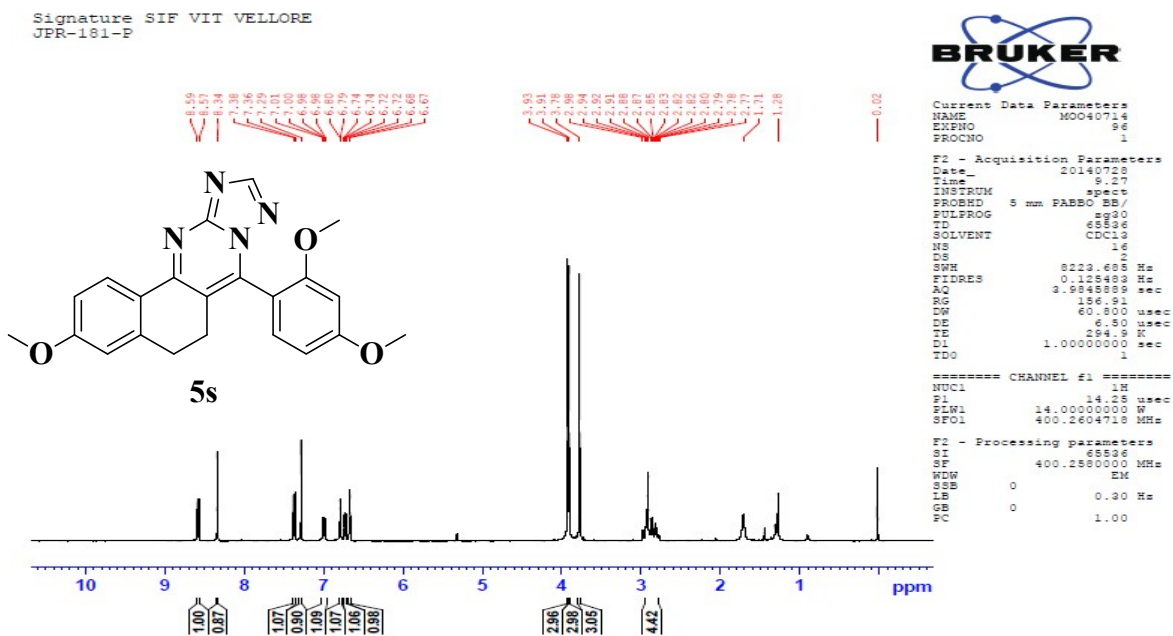

## Expanded <sup>1</sup>H NMR spectrum of compound (5s):

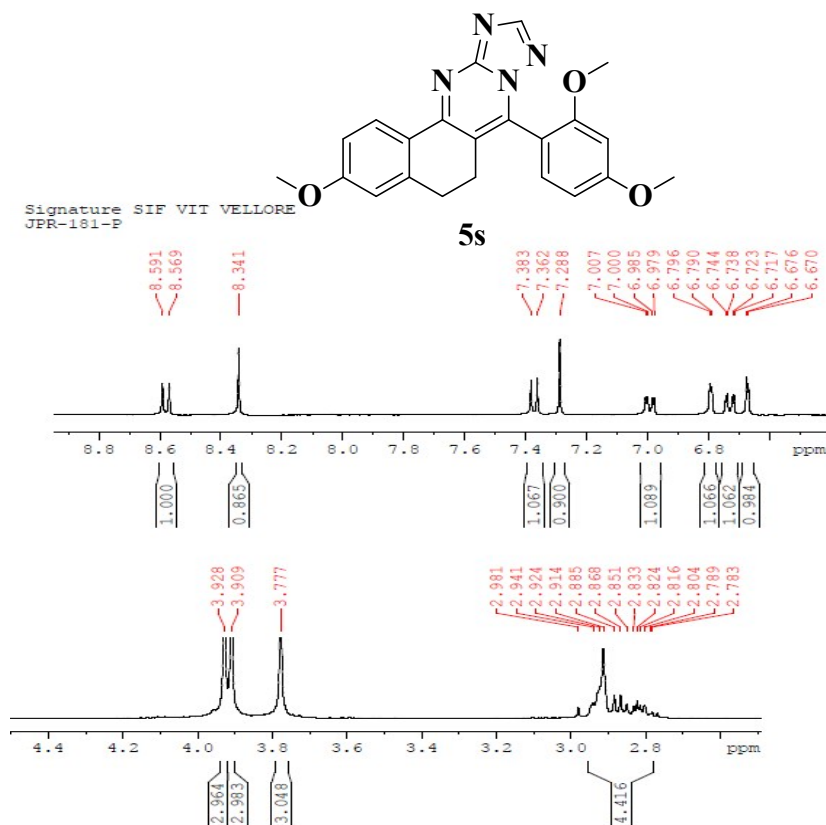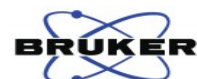

```
Current Data Parameters
NAME      M0040714
EXPNO    26
PROCNO   1

F2 - Acquisition Parameters
Date_    20140723
Time     9.27
INSTRUM spect
PROBHD   5 mm PABBO BB
PULPROG zgpg30
AQ       6.583333
SOLVENT  CDCl3
NS       512
DS       4
SWH      3229.6 Hz
FIDRES   0.333333 Hz
AQRES    0.9345238 sec
SFO1     156.991 MHz
WDW       EM
SSB       0
GB        0
PC        1.00000000
===== CHANNEL f1 =====
NUC1      1H
P1        14.000000 usec
PL1       0.000000 dB
SFO1     400.1460000 MHz
===== CHANNEL f2 =====
NUC1      13C
P1        9.000000 usec
PL1       0.000000 dB
SFO1     100.626182 MHz
F2 - Processing parameters
Date_    20140723
Time     9.27
INSTRUM spect
PROBHD   5 mm PABBO BB
PULPROG zgpg30
AQ       6.583333
SOLVENT  CDCl3
NS       512
DS       4
SWH      24038.463 Hz
FIDRES   0.333333 Hz
AQRES    0.9345238 sec
SFO1     156.991 MHz
WDW       EM
SSB       0
GB        0
PC        1.00000000
===== CHANNEL f1 =====
NUC1      13C
P1        9.000000 usec
PL1       0.000000 dB
SFO1     100.626182 MHz
===== CHANNEL f2 =====
CDPRG12  waltz16
NUC1      13C
P1        9.000000 usec
PL1       0.000000 dB
SFO1     100.626182 MHz
===== CHANNEL f2 =====
F2 - Processing parameters
Date_    20140723
Time     9.27
INSTRUM spect
PROBHD   5 mm PABBO BB
PULPROG zgpg30
AQ       6.583333
SOLVENT  CDCl3
NS       512
DS       4
SWH      24038.463 Hz
FIDRES   0.333333 Hz
AQRES    0.9345238 sec
SFO1     156.991 MHz
WDW       EM
SSB       0
GB        0
PC        1.00000000
===== CHANNEL f1 =====
NUC1      13C
P1        9.000000 usec
PL1       0.000000 dB
SFO1     100.626182 MHz
===== CHANNEL f2 =====
CDPRG12  waltz16
NUC1      13C
P1        9.000000 usec
PL1       0.000000 dB
SFO1     100.626182 MHz
```

## <sup>13</sup>C NMR spectrum of compound (5s):

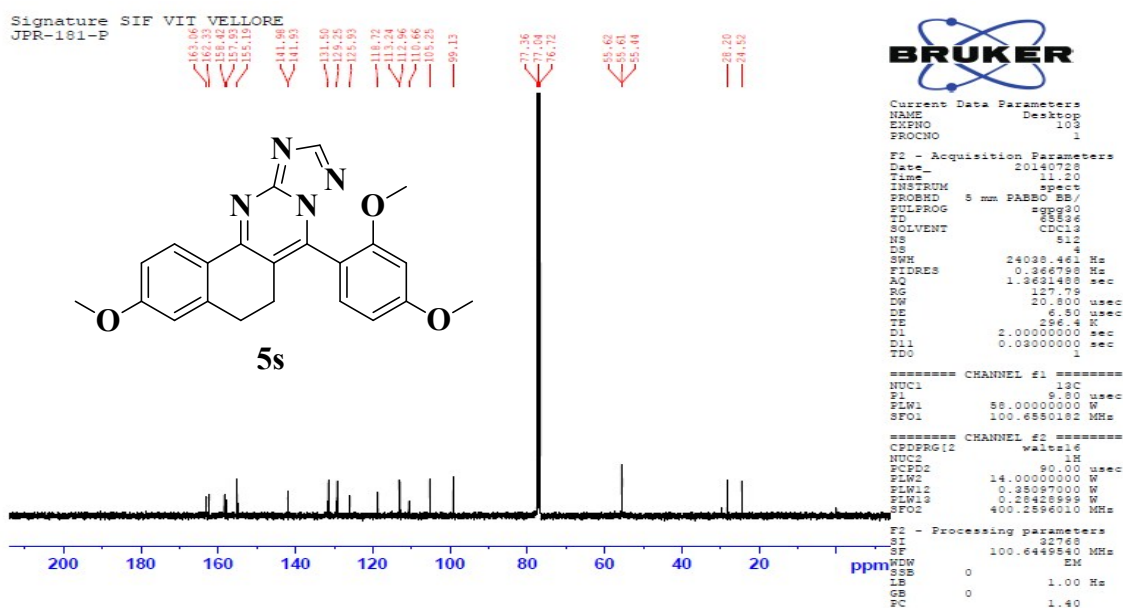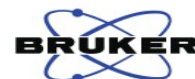

```
Current Data Parameters
NAME      Desktop
EXPNO    103
PROCNO   1

F2 - Acquisition Parameters
Date_    20140723
Time     11.00
INSTRUM spect
PROBHD   5 mm PABBO BB
PULPROG zgpg30
AQ       6.583333
SOLVENT  CDCl3
NS       512
DS       4
SWH      24038.463 Hz
FIDRES   0.333333 Hz
AQRES    0.9345238 sec
SFO1     156.991 MHz
WDW       EM
SSB       0
GB        0
PC        1.00000000
===== CHANNEL f1 =====
NUC1      13C
P1        9.000000 usec
PL1       0.000000 dB
SFO1     100.626182 MHz
===== CHANNEL f2 =====
CDPRG12  waltz16
NUC1      13C
P1        9.000000 usec
PL1       0.000000 dB
SFO1     100.626182 MHz
===== CHANNEL f2 =====
F2 - Processing parameters
Date_    20140723
Time     11.00
INSTRUM spect
PROBHD   5 mm PABBO BB
PULPROG zgpg30
AQ       6.583333
SOLVENT  CDCl3
NS       512
DS       4
SWH      24038.463 Hz
FIDRES   0.333333 Hz
AQRES    0.9345238 sec
SFO1     156.991 MHz
WDW       EM
SSB       0
GB        0
PC        1.00000000
===== CHANNEL f1 =====
NUC1      13C
P1        9.000000 usec
PL1       0.000000 dB
SFO1     100.626182 MHz
===== CHANNEL f2 =====
CDPRG12  waltz16
NUC1      13C
P1        9.000000 usec
PL1       0.000000 dB
SFO1     100.626182 MHz
```

## HRMS spectrum of compound (5s):

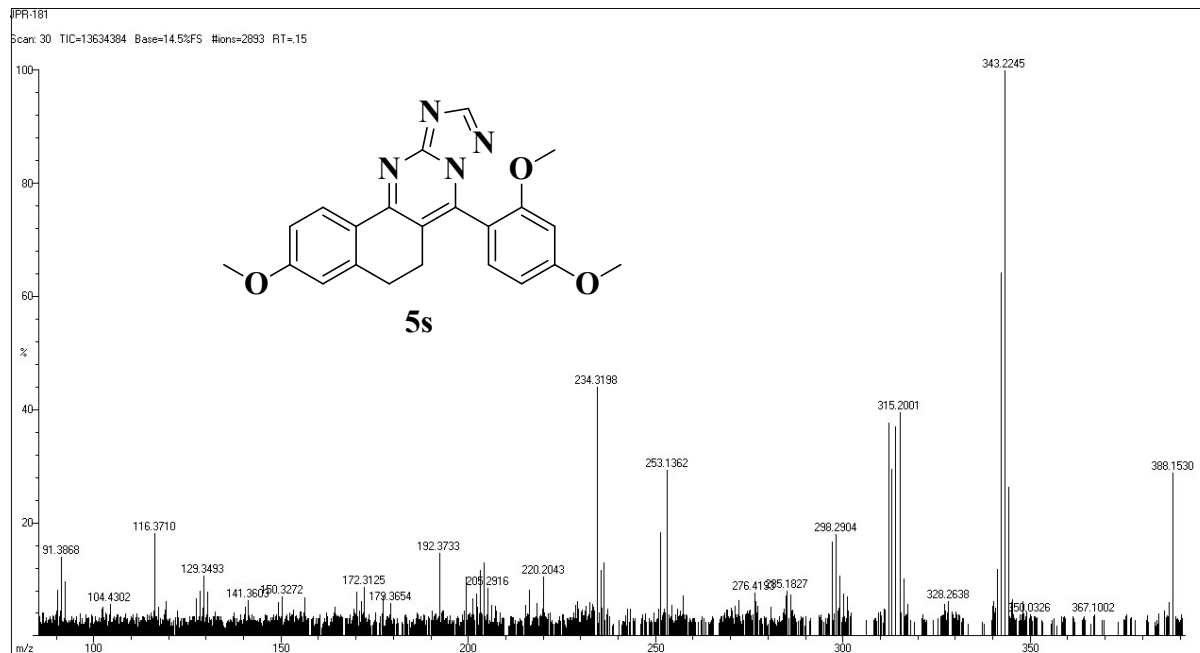

## <sup>1</sup>H NMR spectrum of compound (5t):

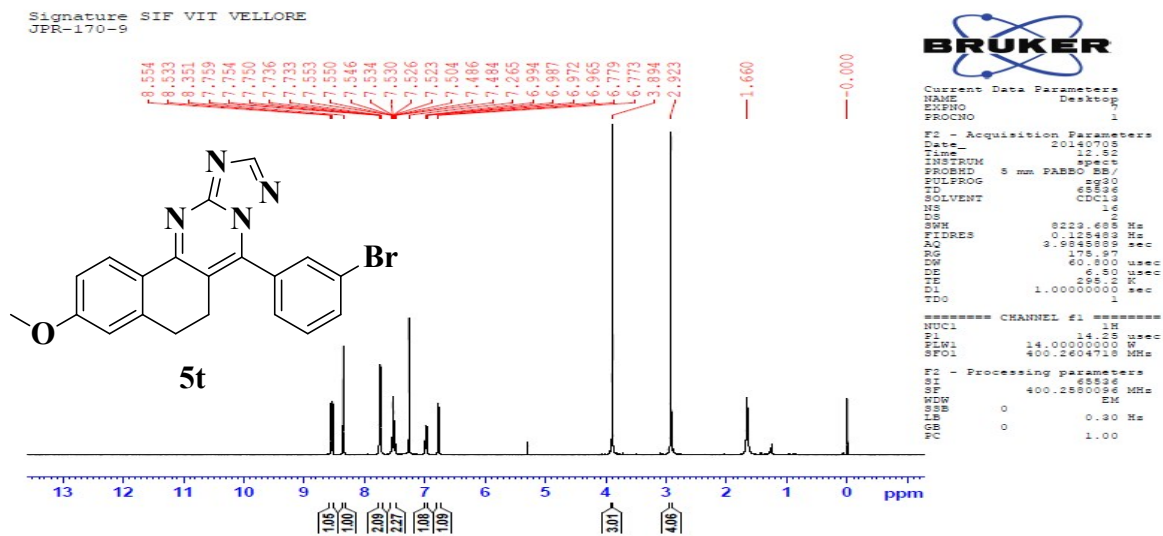



## Expanded <sup>1</sup>H NMR spectrum of compound (5t):

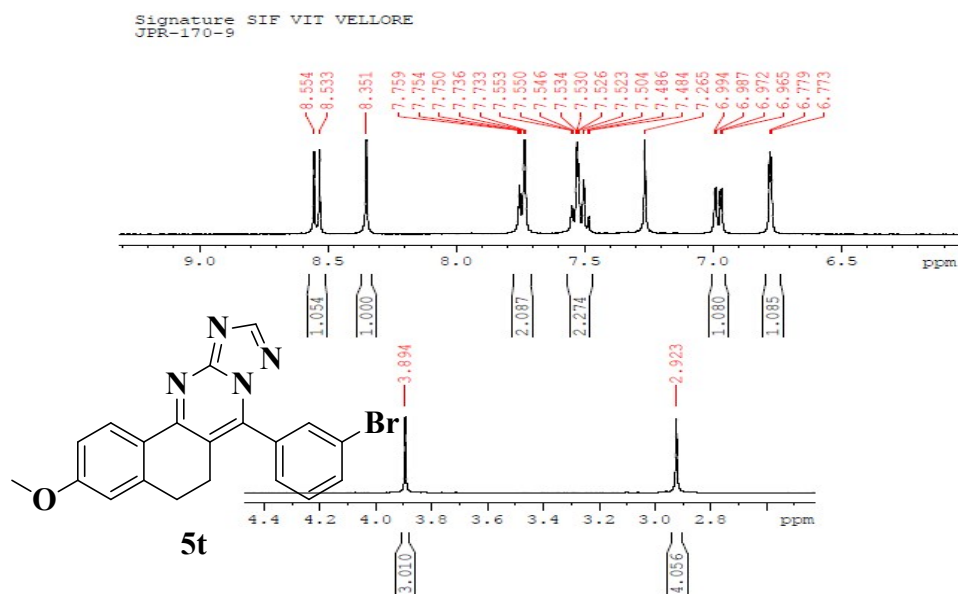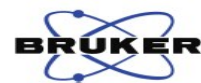

```

Current Data Parameters
NAME      Desktop
EXPNO    1
PROCNO   1

F2 - Acquisition Parameters
Date_    20140708
Time     12:24
INSTRUM  spect
PROBHD   5 mm PABBO BB
PULPROG  zgpg30
ID       0
SOLVENT  CDCl3
NS       512
DSH      4
AQ       0.12500000 sec
RG       655.36000000
FIDRES   0.10000000 Hz
AQRES    3.904000000 Hz
SFO1     400.1460000 MHz
NUC1      13C
P1        12.00000000 sec
PL1       0.00000000 dB
SFO2     101.2530000 MHz
NUC2      1H
P2        0.00000000 sec
PL2       0.00000000 dB
SFO3     400.1460000 MHz
NUC3      1H
P3        0.00000000 sec
PL3       0.00000000 dB
SFO4     0.00000000 MHz
NUC4      13C
P4        0.00000000 sec
PL4       0.00000000 dB
===== CHANNEL f1 =====
NUC1      1H
P1        14.00000000 sec
PL1       0.00000000 dB
SFO1     400.1460000 MHz
===== Processing parameters =====
RG       655.36000000
SFO1     400.1460000 MHz
EM       EM
GB1      0
GB2      0
GB3      0
GB4      0
NUC1      1H
NUC2      13C
===== CHANNEL f2 =====
NUC1      13C
P1        12.00000000 sec
PL1       0.00000000 dB
SFO1     101.2530000 MHz
===== CHANNEL f3 =====
NUC1      1H
P1        12.00000000 sec
PL1       0.00000000 dB
SFO1     400.1460000 MHz
===== Processing parameters =====
RG       655.36000000
SFO1     400.1460000 MHz
EM       EM
GB1      0
GB2      0
GB3      0
GB4      0
NUC1      1H
NUC2      13C
===== CHANNEL f4 =====
NUC1      13C
P1        12.00000000 sec
PL1       0.00000000 dB
SFO1     101.2530000 MHz
===== Processing parameters =====
RG       655.36000000
SFO1     400.1460000 MHz
EM       EM
GB1      0
GB2      0
GB3      0
GB4      0

```

## <sup>13</sup>C NMR spectrum of compound (5t):

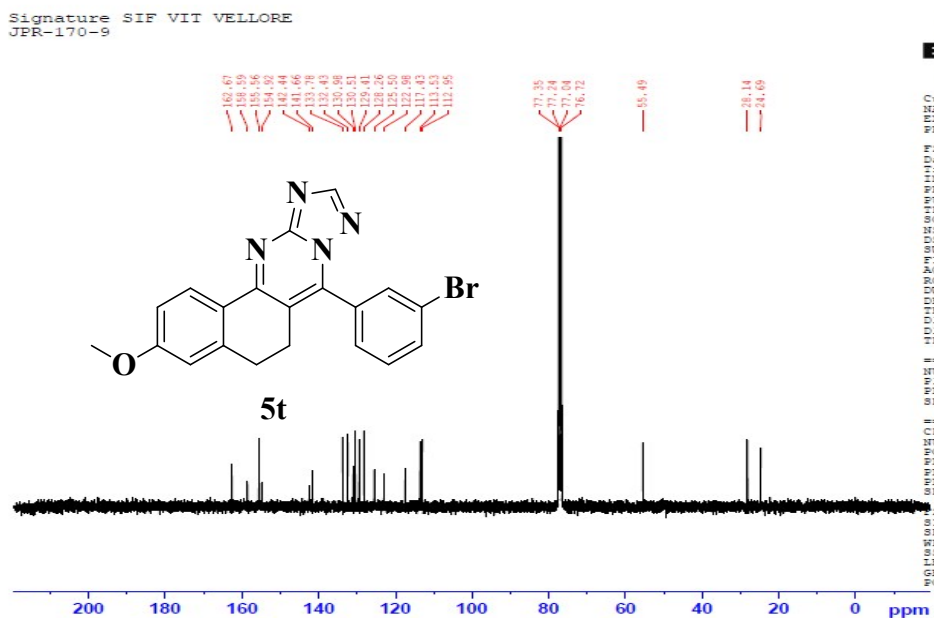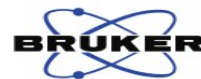

```

Current Data Parameters
NAME      Desktop
EXPNO    1
PROCNO   1

F2 - Acquisition Parameters
Date_    20140708
Time     12:24
INSTRUM  spect
PROBHD   5 mm PABBO BB
PULPROG  zgpg30
ID       0
SOLVENT  CDCl3
NS       512
DSH      4
AQ       0.12500000 sec
RG       655.36000000
FIDRES   0.10000000 Hz
AQRES    3.904000000 Hz
SFO1     400.1460000 MHz
NUC1      13C
P1        12.00000000 sec
PL1       0.00000000 dB
SFO2     101.2530000 MHz
NUC2      1H
P2        0.00000000 sec
PL2       0.00000000 dB
SFO3     400.1460000 MHz
NUC3      1H
P3        0.00000000 sec
PL3       0.00000000 dB
SFO4     0.00000000 MHz
NUC4      13C
P4        0.00000000 sec
PL4       0.00000000 dB
===== CHANNEL f1 =====
NUC1      13C
P1        12.00000000 sec
PL1       0.00000000 dB
SFO1     101.2530000 MHz
===== CHANNEL f2 =====
NUC1      1H
P1        12.00000000 sec
PL1       0.00000000 dB
SFO1     400.1460000 MHz
===== Processing parameters =====
RG       655.36000000
SFO1     400.1460000 MHz
EM       EM
GB1      0
GB2      0
GB3      0
GB4      0
NUC1      1H
NUC2      13C
===== CHANNEL f3 =====
NUC1      13C
P1        12.00000000 sec
PL1       0.00000000 dB
SFO1     101.2530000 MHz
===== Processing parameters =====
RG       655.36000000
SFO1     400.1460000 MHz
EM       EM
GB1      0
GB2      0
GB3      0
GB4      0

```

## HRMS spectrum of compound (5t):

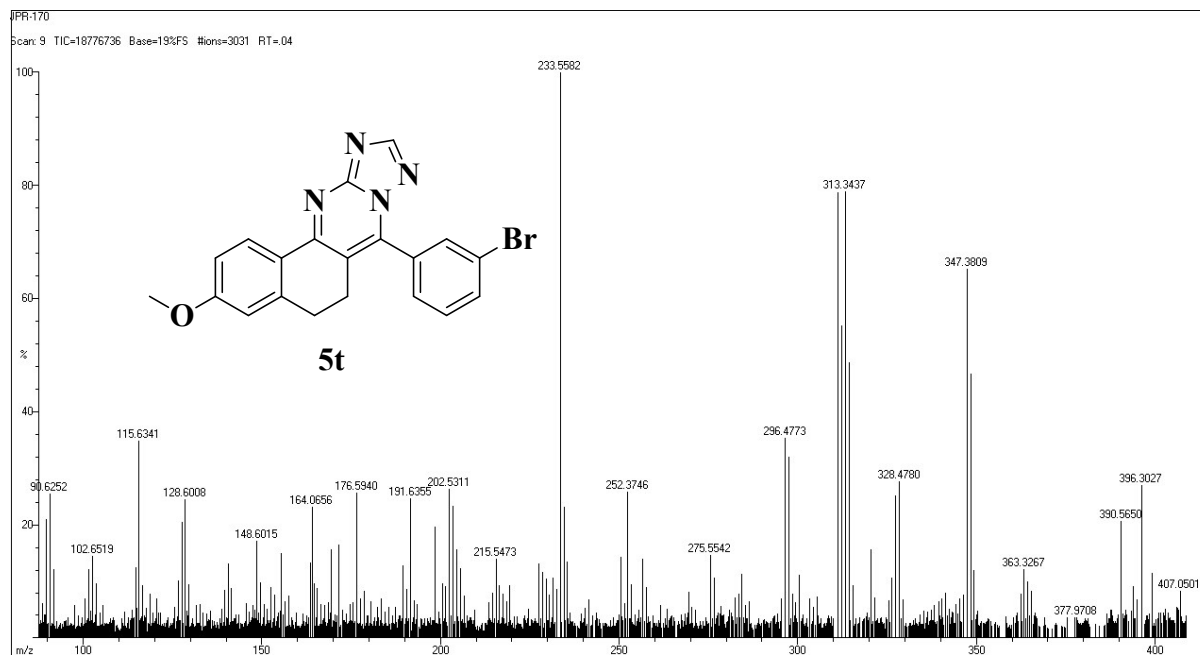

## <sup>1</sup>H NMR spectrum of compound (5u):

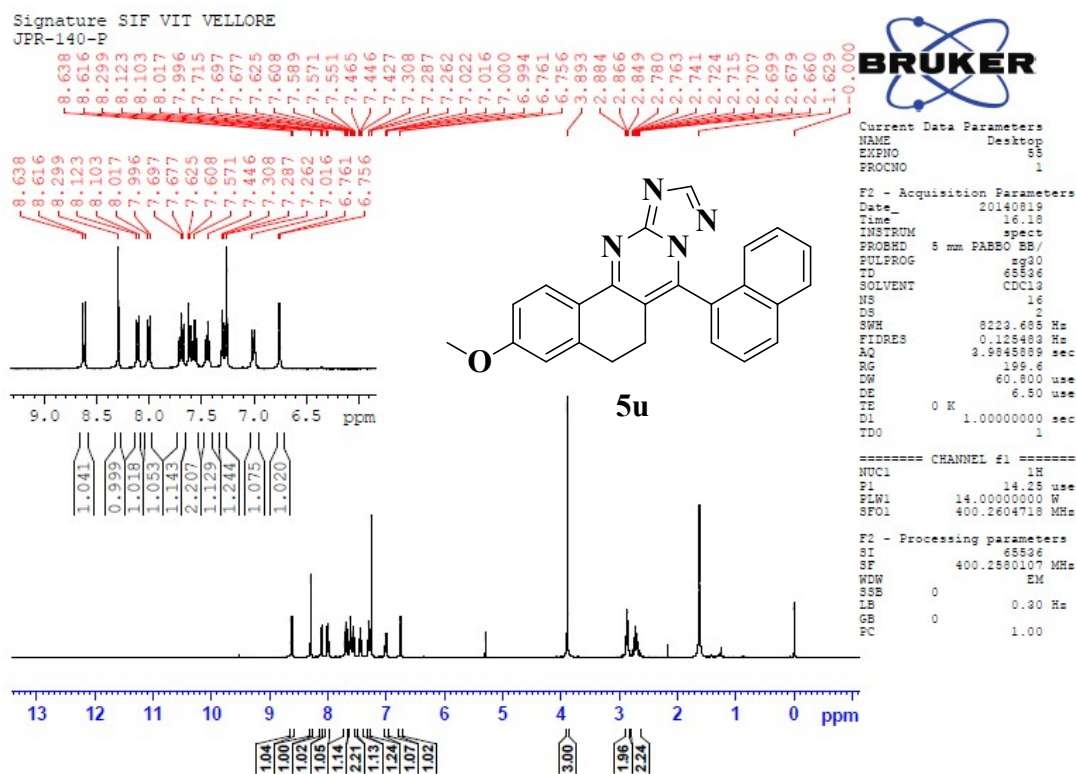

# <sup>13</sup>C NMR spectrum of compound (5u):

Signature SIF VIT VELLORE  
JPR-140-P

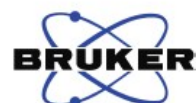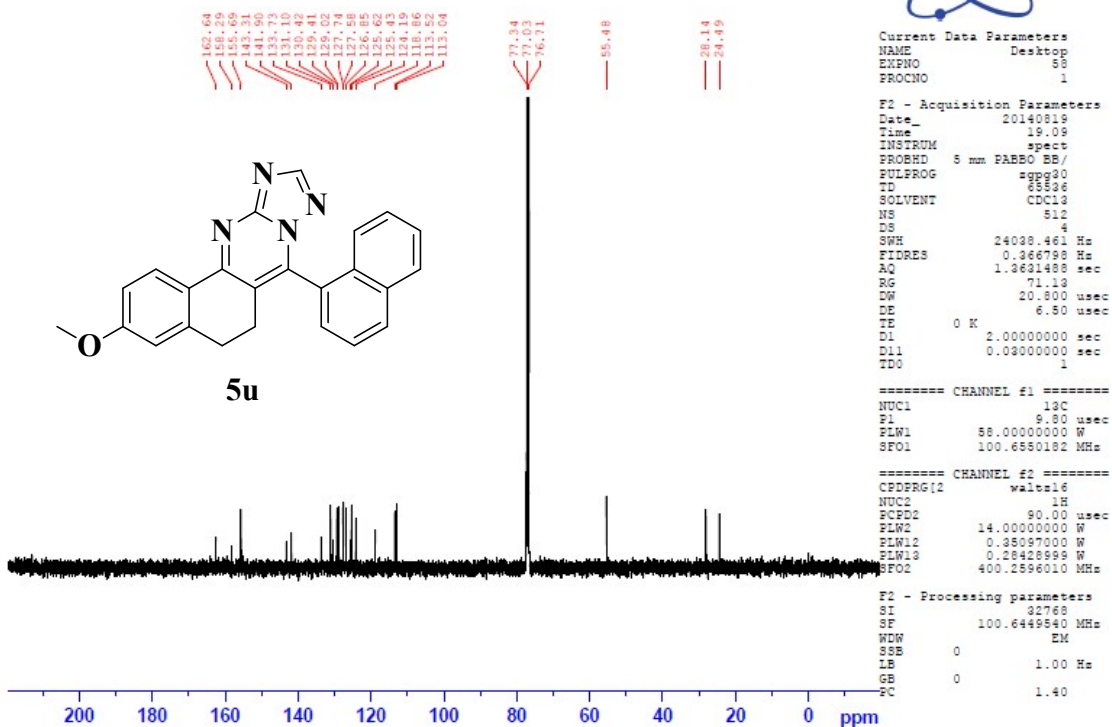

# HRMS spectrum of compound (5u):

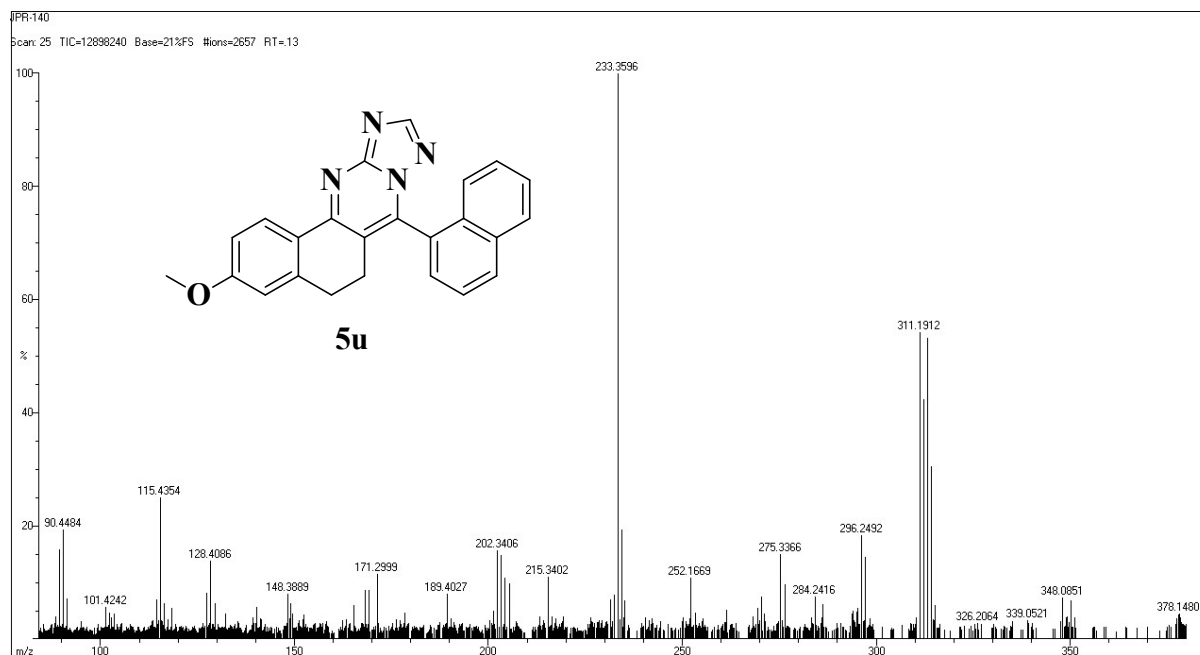

# <sup>1</sup>H NMR spectrum of compound (5v):

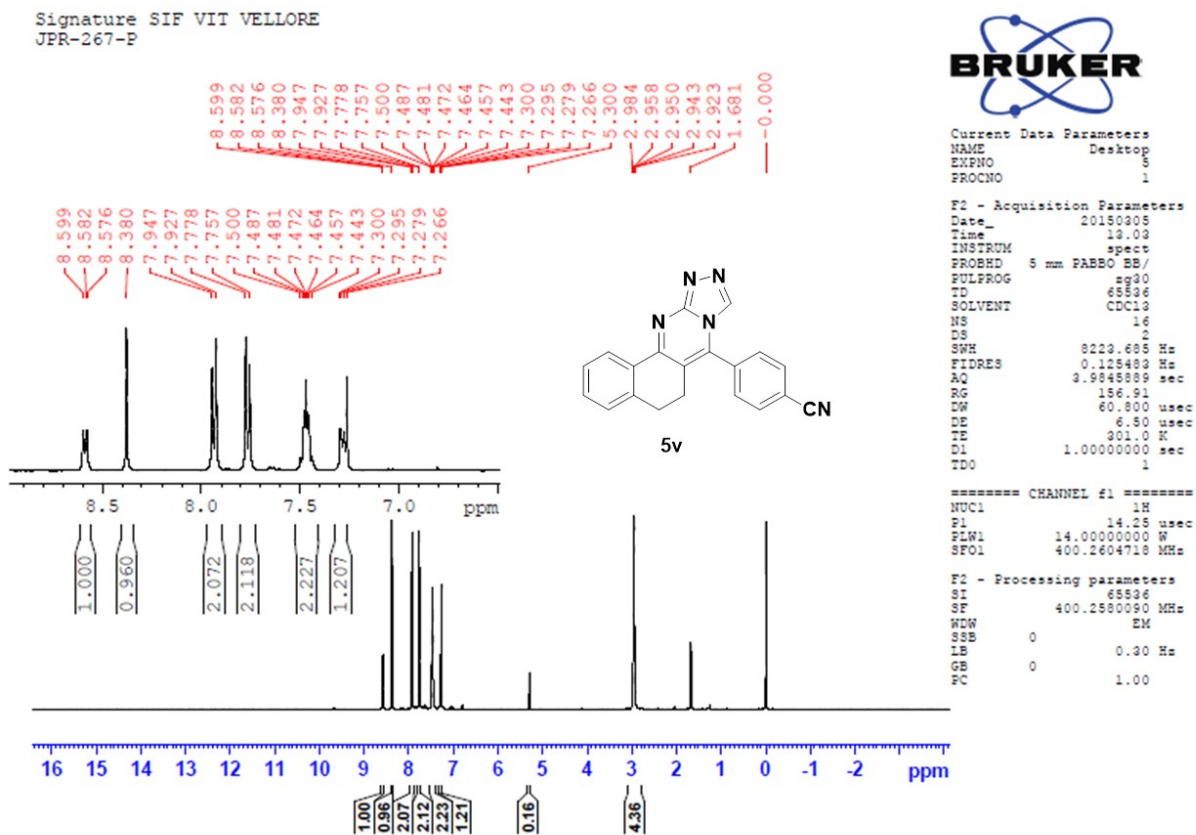

# <sup>13</sup>C NMR spectrum of compound (5u):

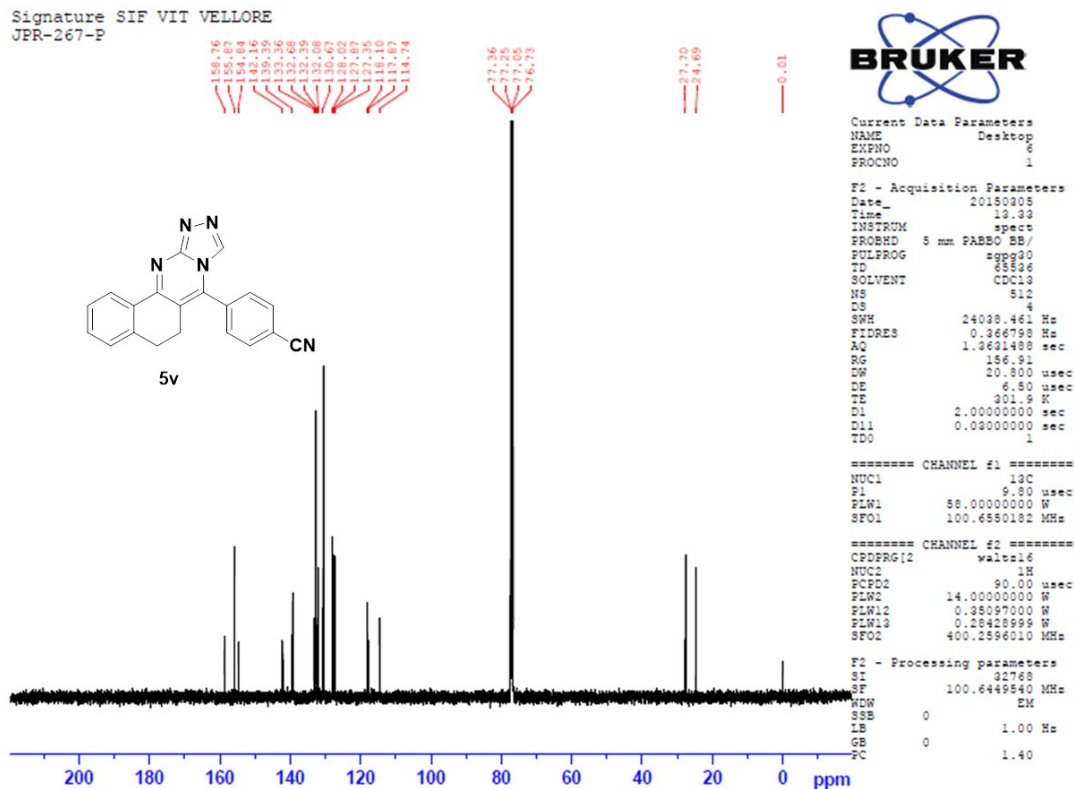

## HRMS spectrum of compound (5v):

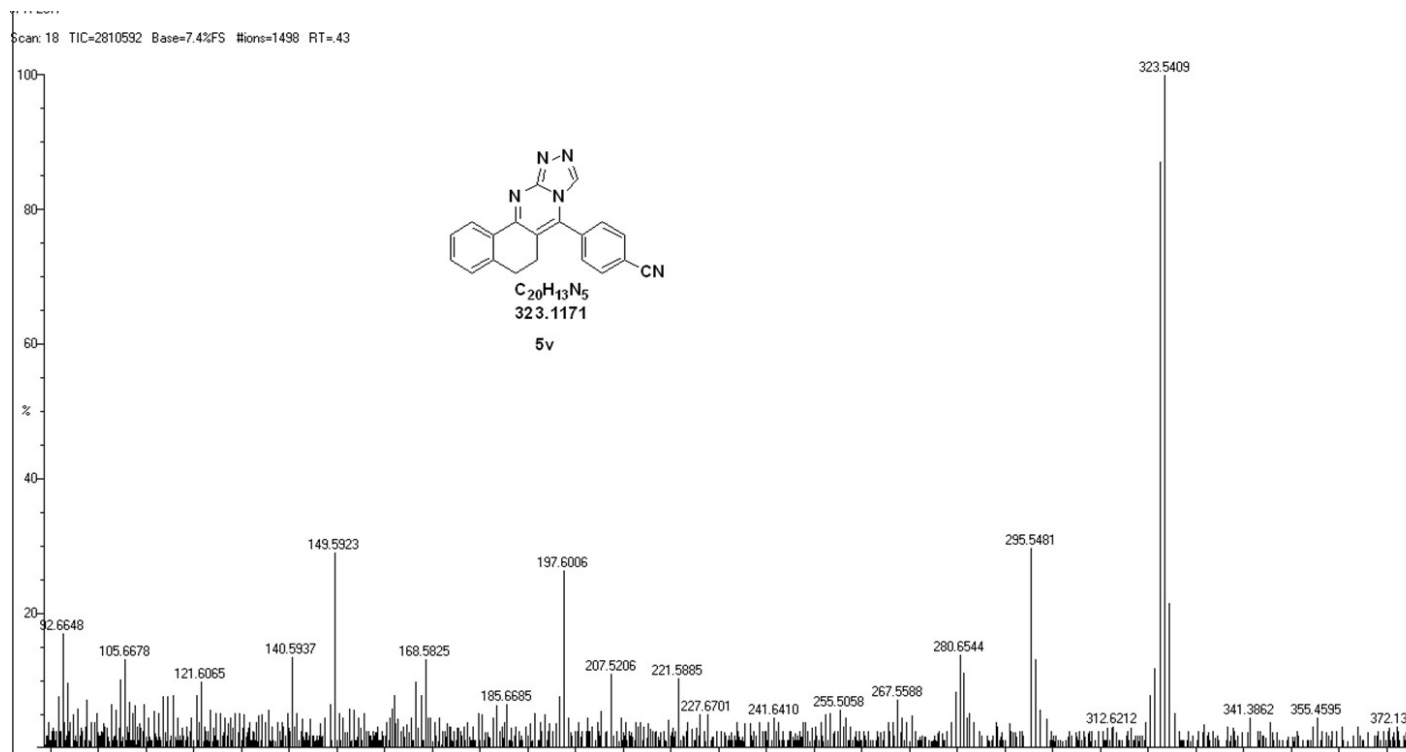

## <sup>1</sup>H NMR spectrum of compound (6a):

Signature SIF VIT VELLORE  
 JPR-108-P

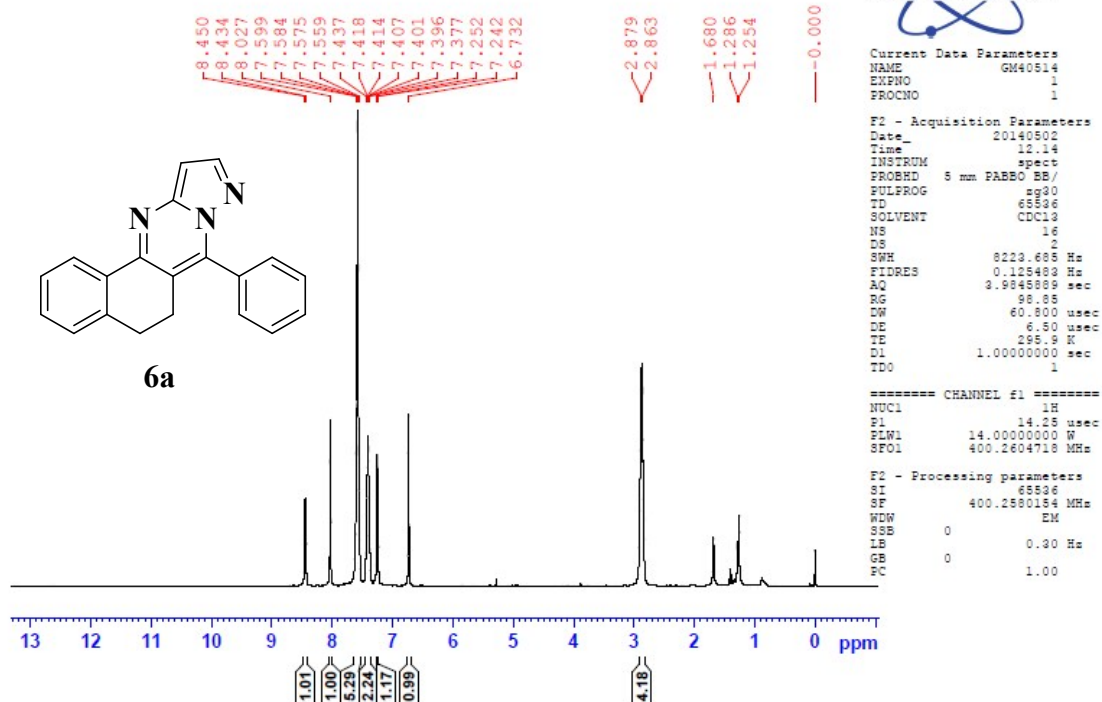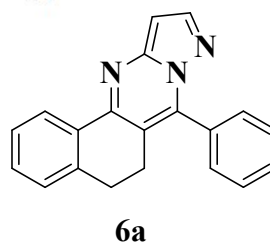

# Expanded <sup>1</sup>H NMR spectrum of compound (6a):

Signature SIF VIT VELLORE  
JPR-108-P

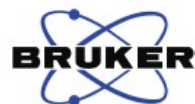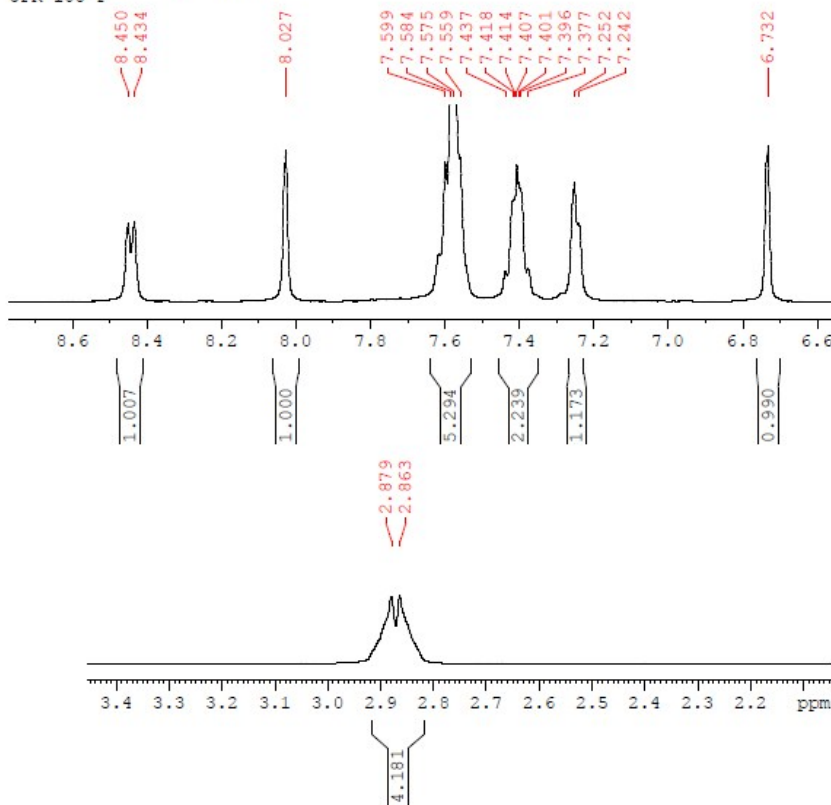

Current Data Parameters  
NAME GM40514  
EXNO 1  
PROCNO 1

F2 - Acquisition Parameters  
Date\_ 20140502  
Time 12.14  
INSTRUM spect  
PROBHD 5 mm PABBO ES/  
PULPROG zg30  
TD 65536  
SOLVENT CDCl3  
NS 16  
DS 2  
SWH 8223.605 Hz  
FIDRES 0.125483 Hz  
AQ 3.9845889 sec  
RG 88.85  
DQ 60.800 usec  
DE 6.80 usec  
TE 298.9 K  
DL 1.00000000 sec  
TDO 1

==== CHANNEL f1 =====  
NUC1 1H  
P1 14.25 usec  
PLW1 14.00000000 W  
SFO1 400.2604718 MHz

F2 - Processing parameters  
SI 65536  
SF 400.2880154 MHz  
WDW EM  
SSB 0  
LB 0.30 Hz  
GB 0  
PC 1.00

### <sup>13</sup>C NMR spectrum of compound (6a):

Signature SIF VIT VELLORE  
JPR-108-P

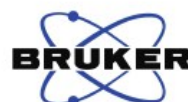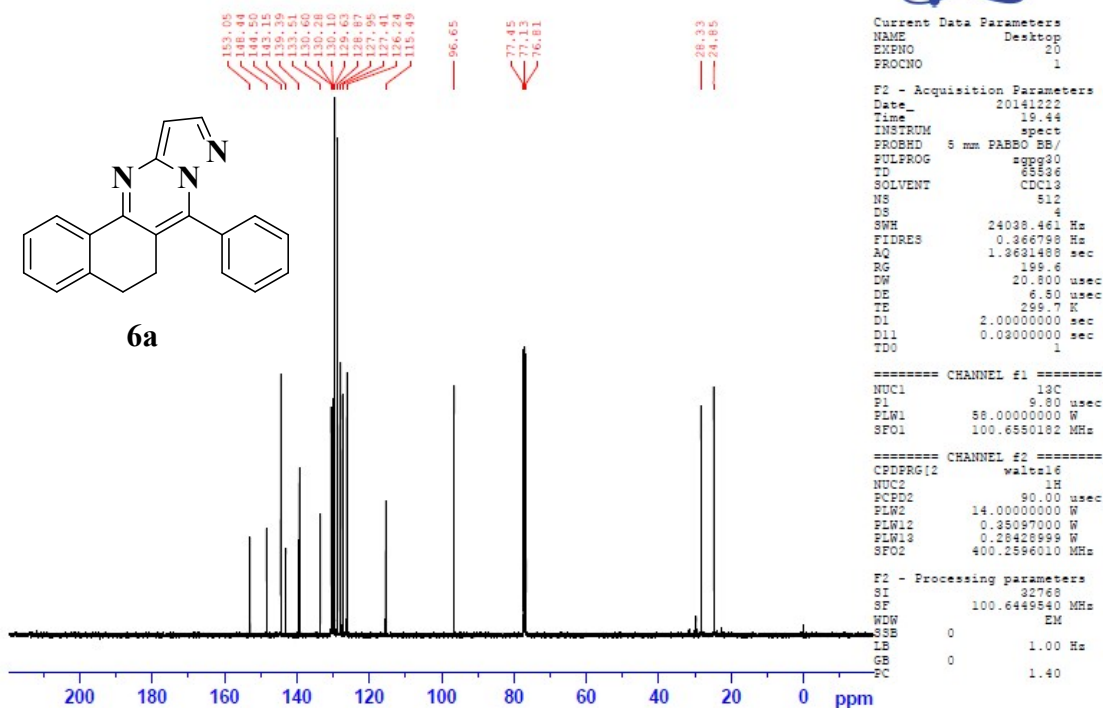

### HRMS spectrum of compound (6a):

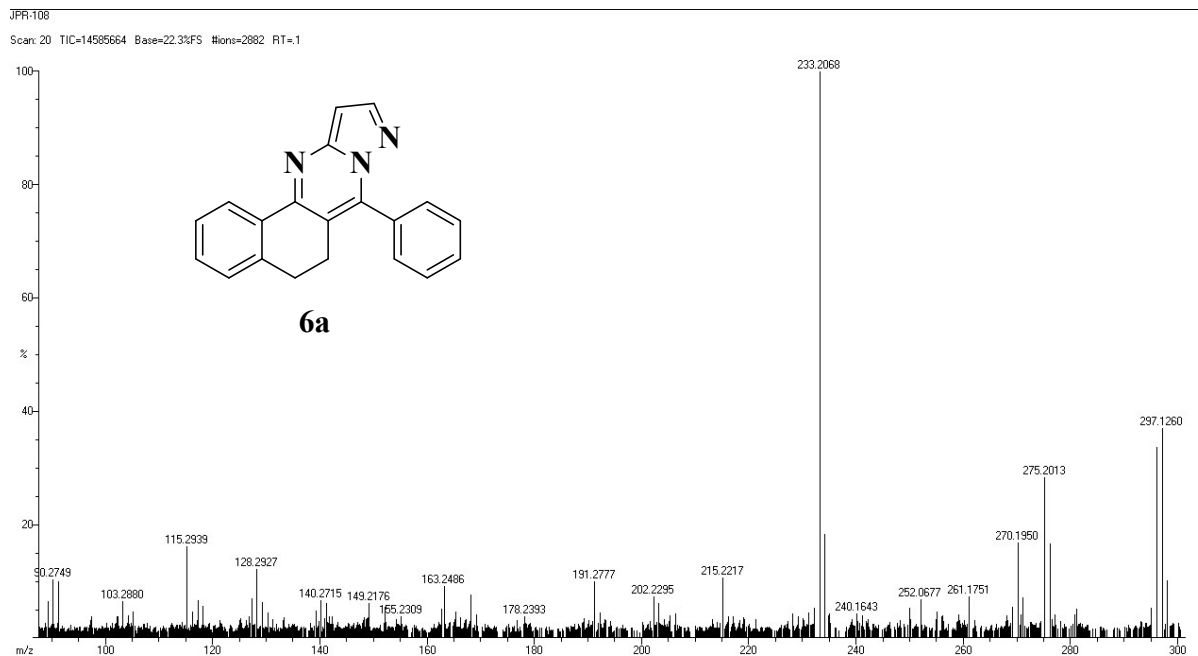

# <sup>1</sup>H NMR spectrum of compound (6b):

Signature SIF VIT VELLORE  
JPR-095-P

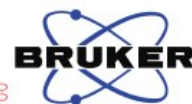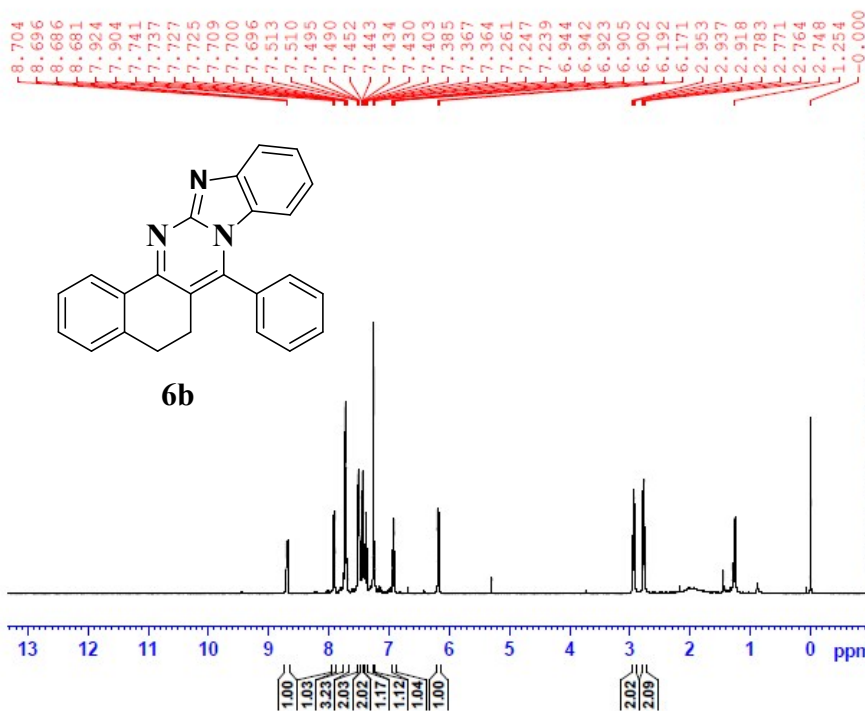

Current Data Parameters  
NAME Desktop  
EXPNO 77  
PROCNO 1

F2 - Acquisition Parameters  
Date\_ 20140723  
Time 10.44  
INSTRUM spect  
PROBHD 5 mm PABBO BB/  
PULPROG zg30  
TD 65536  
SOLVENT CDCl3  
NS 16  
DS 2  
SWH 8223.685 Hz  
FIDRES 0.125483 Hz  
AQ 3.9845889 sec  
RG 156.91  
DW 60.800 usec  
DE 6.50 usec  
TE 296.2 K  
D1 1.00000000 sec  
TDO 1

===== CHANNEL f1 =====  
NUC1 1H  
P1 14.25 usec  
PLW1 14.00000000 W  
SF01 400.2604718 MHz

F2 - Processing parameters  
SI 65536  
SF 400.2580110 MHz  
WDW EM  
SSB 0  
LB 0.30 Hz  
GB 0  
FC 1.00

# Expanded <sup>1</sup>H NMR spectrum of compound (6b):

Signature SIF VIT VELLORE  
JPR-095-P

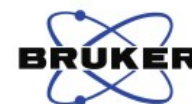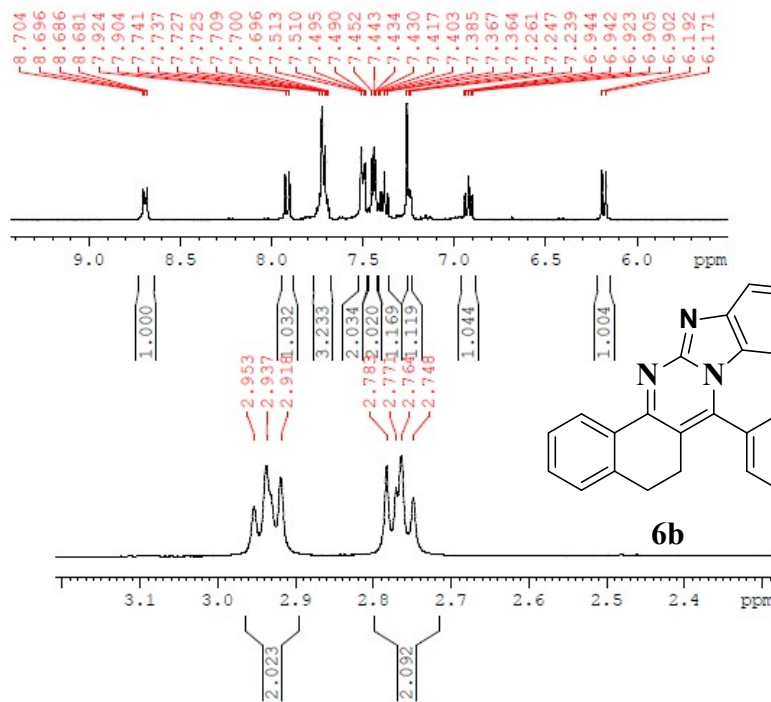

Current Data Parameters  
NAME Desktop  
EXPNO 77  
PROCNO 1

F2 - Acquisition Parameters  
Date\_ 20140723  
Time 10.44  
INSTRUM spect  
PROBHD 5 mm PABBO BB/  
PULPROG zg30  
TD 65536  
SOLVENT CDCl3  
NS 16  
DS 2  
SWH 8223.685 Hz  
FIDRES 0.125483 Hz  
AQ 3.9845889 sec  
RG 156.91  
DW 60.800 usec  
DE 6.50 usec  
TE 296.2 K  
D1 1.00000000 sec  
TDO 1

===== CHANNEL f1 =====  
NUC1 1H  
P1 14.25 usec  
PLW1 14.00000000 W  
SF01 400.2604718 MHz

F2 - Processing parameters  
SI 65536  
SF 400.2580110 MHz  
WDW EM  
SSB 0  
LB 0.30 Hz  
GB 0  
FC 1.00



# <sup>13</sup>C NMR spectrum of compound (6b):

JPR-095-P

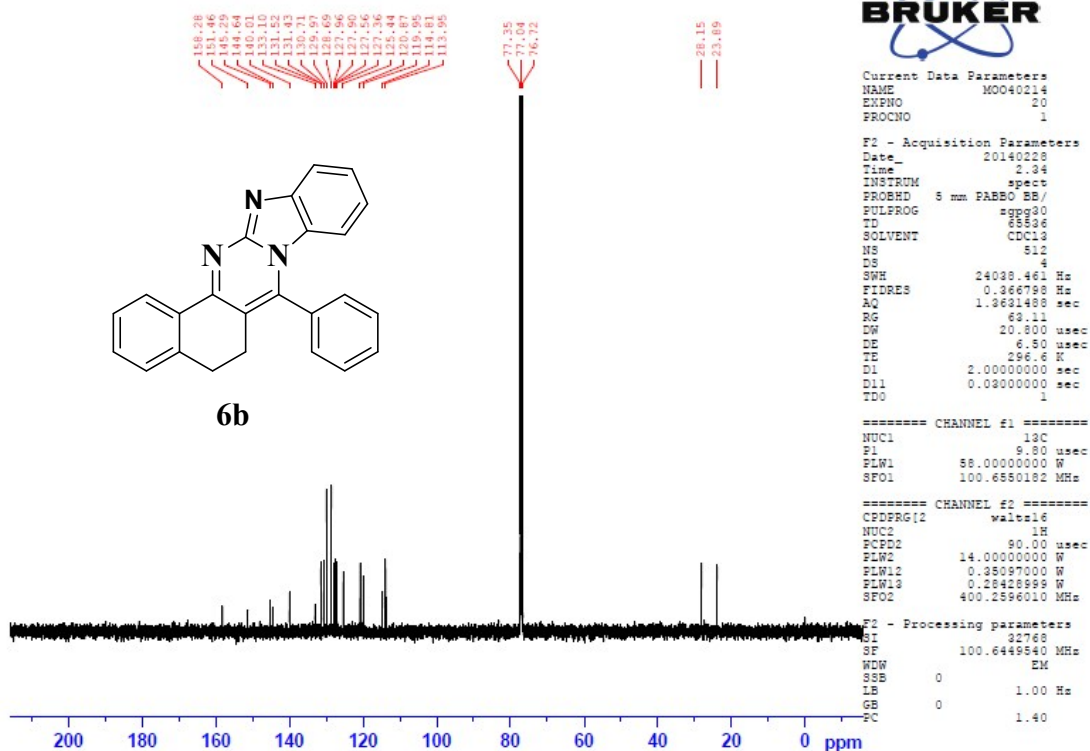

# HRMS spectrum of compound (6b):

JPR-095

Scan: 8 TIC=10947472 Base=3.2%FS #Ions=2647 RT=.04

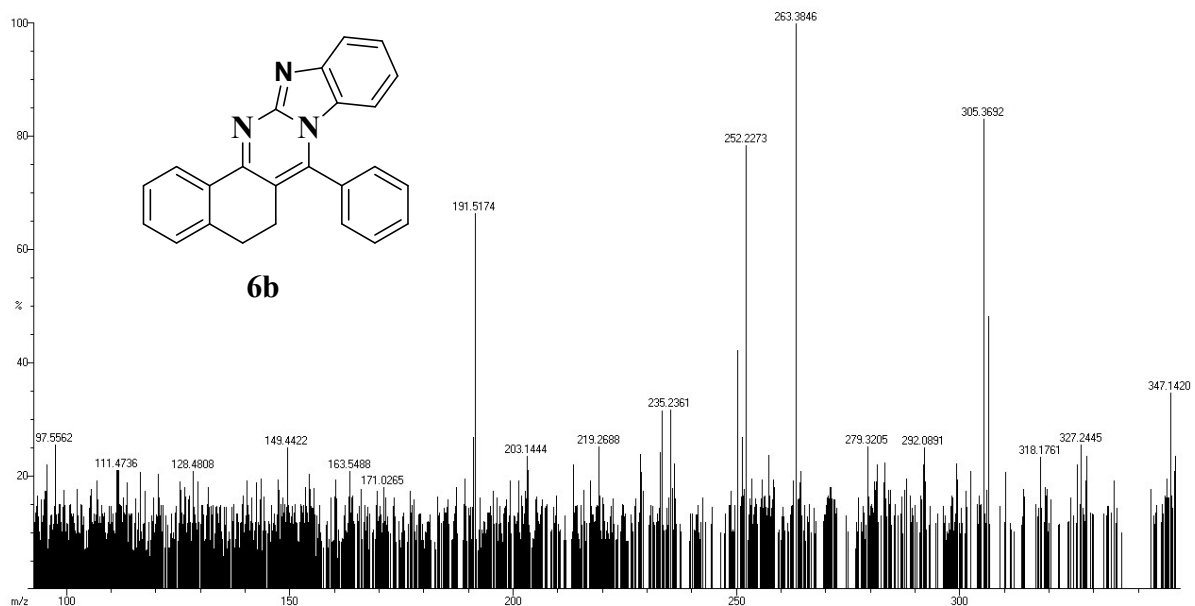

# <sup>1</sup>H NMR spectrum of compound (6c):

Signature SIF VIT VELLORE  
JPR-107-P

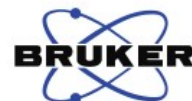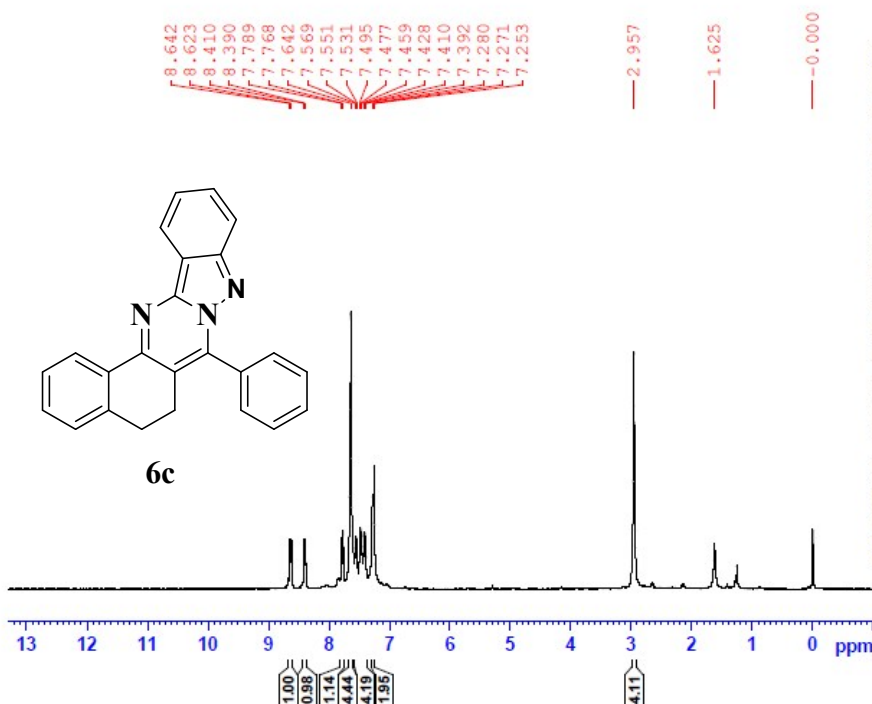

Current Data Parameters  
NAME Desktop  
EXPNO 78  
PROCNO 1

F2 - Acquisition Parameters  
Date\_ 20140723  
Time 10.47  
INSTRUM spect  
PROBHD 5 mm PABBO BB/  
PULPROG zg30  
TD 65536  
SOLVENT CDCl3  
NS 16  
DS 2  
SWH 8223.685 Hz  
FIDRES 0.125483 Hz  
AQ 3.9845889 sec  
RG 143.73  
DM 60.800 usec  
DE 6.50 usec  
TE 296.2 K  
D1 1.00000000 sec  
TDO 1

===== CHANNEL #1 =====  
NUC1 1H  
P1 14.25 usec  
PLW1 14.00000000 W  
SFO1 400.2604718 MHz

F2 - Processing parameters  
SI 65536  
SF 400.2580143 MHz  
WDW EM  
SSB 0  
LB 0.30 Hz  
GB 0  
FC 1.00

# Expanded <sup>1</sup>H NMR spectrum of compound (6c):

Signature SIF VIT VELLORE  
JPR-107-P

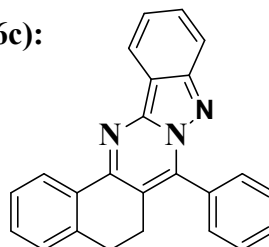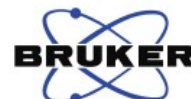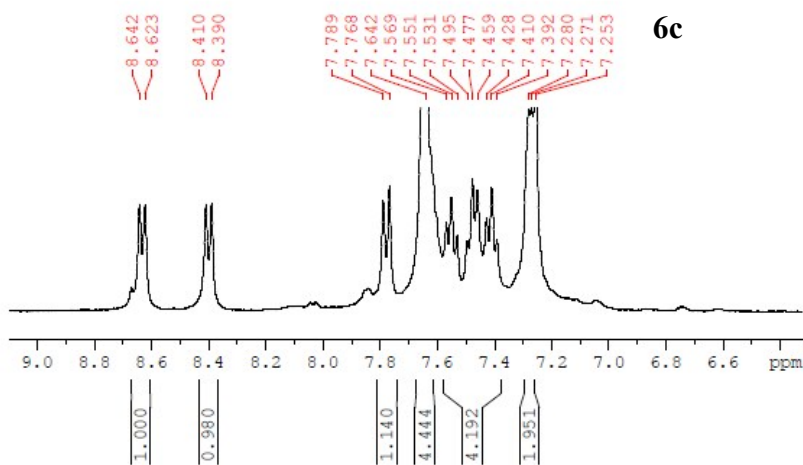

Current Data Parameters  
NAME Desktop  
EXPNO 78  
PROCNO 1

F2 - Acquisition Parameters  
Date\_ 20140723  
Time 10.47  
INSTRUM spect  
PROBHD 5 mm PABBO BB/  
PULPROG zg30  
TD 65536  
SOLVENT CDCl3  
NS 16  
DS 2  
SWH 8223.685 Hz  
FIDRES 0.125483 Hz  
AQ 3.9845889 sec  
RG 143.73  
DM 60.800 usec  
DE 6.50 usec  
TE 296.2 K  
D1 1.00000000 sec  
TDO 1

===== CHANNEL #1 =====  
NUC1 1H  
P1 14.25 usec  
PLW1 14.00000000 W  
SFO1 400.2604718 MHz

F2 - Processing parameters  
SI 65536  
SF 400.2580143 MHz  
WDW EM  
SSB 0  
LB 0.30 Hz  
GB 0  
FC 1.00

### <sup>13</sup>C NMR spectrum of compound (6c):

Signature SIF VIT VELLORE  
JPR-107-P

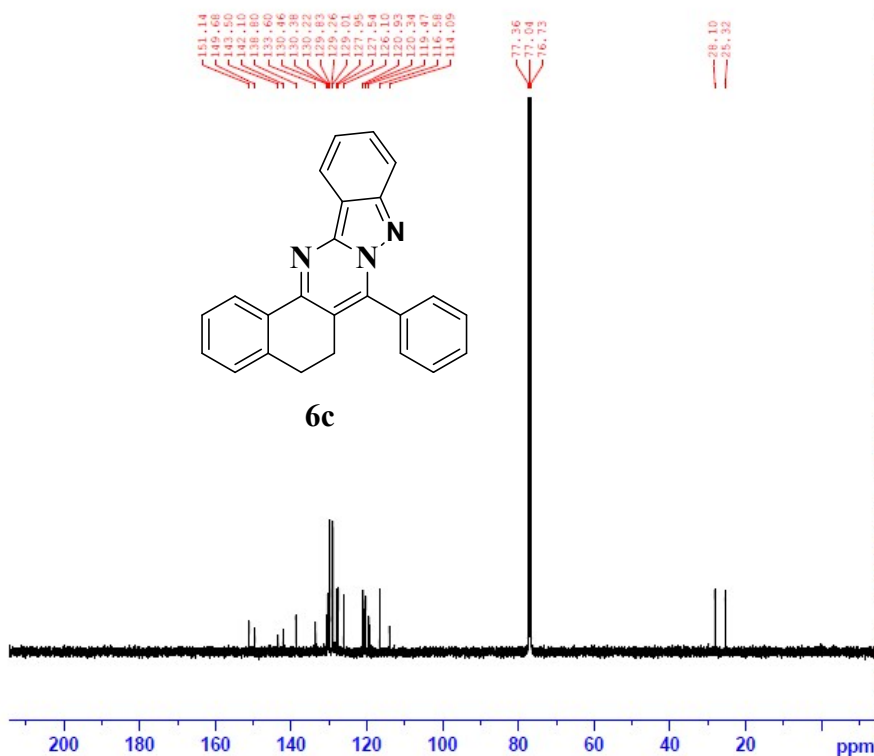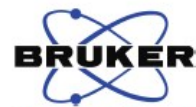

Current Data Parameters  
NAME Desktop  
EXPNO 79  
PROCNO 1

F2 - Acquisition Parameters  
Date\_ 20140722  
Time 11.18  
INSTRUM spect  
PROBHD 5 mm PABBO BB/  
PULPROG zgpg30  
TD 65536  
SOLVENT CDCl3  
NS 512  
DS 4  
SWH 24038.461 Hz  
FIDRES 0.366798 Hz  
AQ 1.3631488 sec  
RG 127.79  
SW 20.800 usec  
DE 6.50 usec  
TE 297.2 K  
DL 2.00000000 sec  
Dl1 0.03000000 sec  
TDO 1

==== CHANNEL #1 =====  
NUC1 13C  
P1 9.80 usec  
PLW1 58.00000000 W  
SFO1 100.6250182 MHz

==== CHANNEL #2 =====  
CPDPRG2 waltz16  
NUC2 1H  
PCPD2 90.00 usec  
PLW2 14.00000000 W  
FLW2 0.35097000 W  
PLW3 0.28428999 W  
SFO2 400.2596010 MHz

F2 - Processing parameters  
SI 32768  
SF 100.6449540 MHz  
WDW EM  
SSB 0  
LB 1.00 Hz  
GB 0  
PC 1.40

### HRMS spectrum of compound (6c):

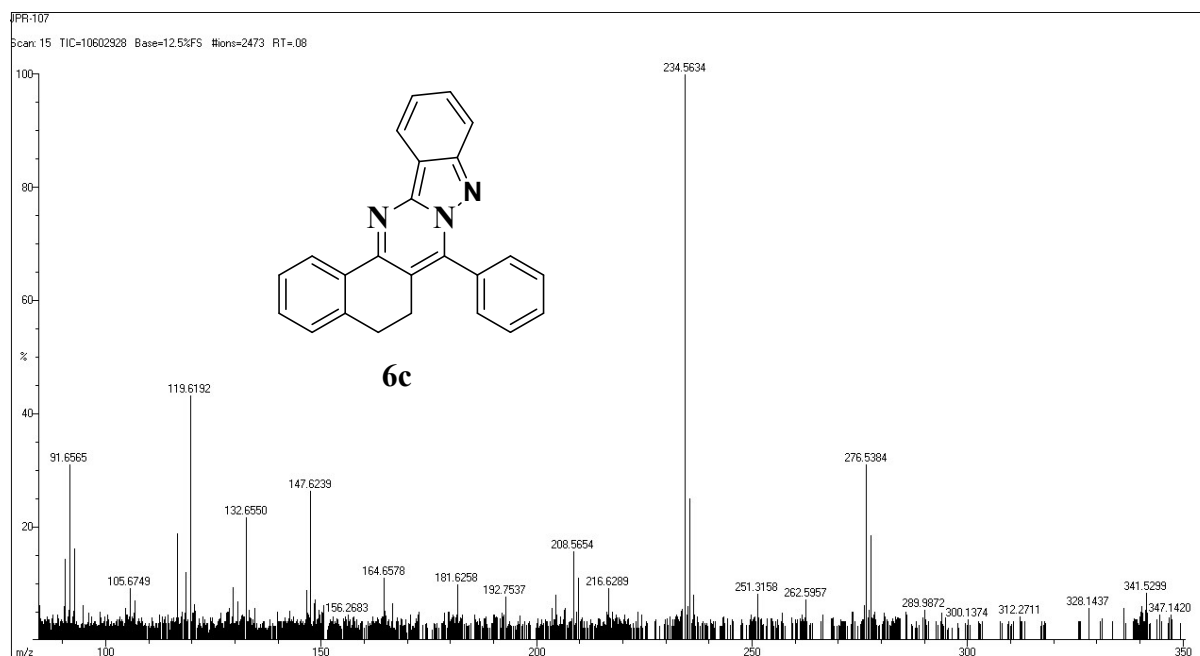

# <sup>1</sup>H NMR spectrum of compound (6f):

JPR-064-P

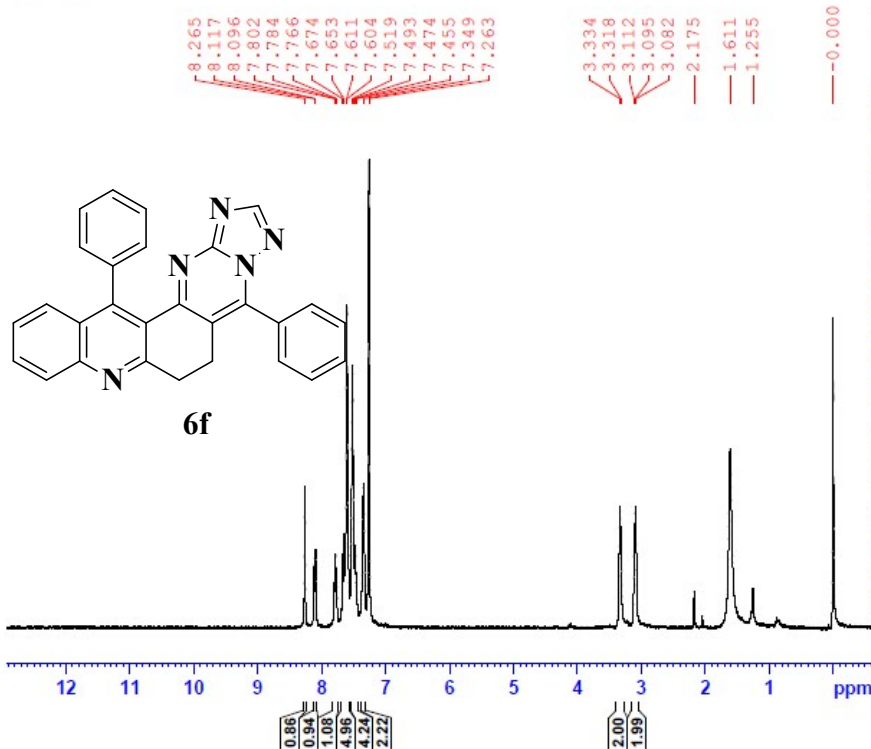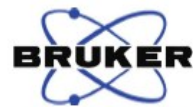

Current Data Parameters  
 NAME MOD40114  
 EXPNO 13  
 PROCNO 1

F2 - Acquisition Parameters  
 Date\_ 20140127  
 Time 18.22  
 INSTRUM spect  
 PROBHD 5 mm PABBO BB/  
 PULPROG zg30  
 TD 65536  
 SOLVENT CDCl3  
 NS 16  
 DS 2  
 SWH 8223.685 Hz  
 FIDRES 0.125493 Hz  
 AQ 3.9945889 sec  
 RG 199.6  
 DW 60.800 usec  
 DE 6.50 usec  
 TE 295.9 K  
 DL 1.00000000 sec  
 TDO 1

===== CHANNEL f1 =====  
 NUC1 1H  
 P1 14.25 usec  
 PLW1 14.00000000 W  
 SFO1 400.2604718 MHz

F2 - Processing parameters  
 SI 65536  
 SF 400.2604718 MHz  
 WDW EM  
 SSB 0  
 GB 0 0.30 Hz  
 PC 1.00

# Expanded <sup>1</sup>H NMR spectrum of compound (6f):

JPR-064-P

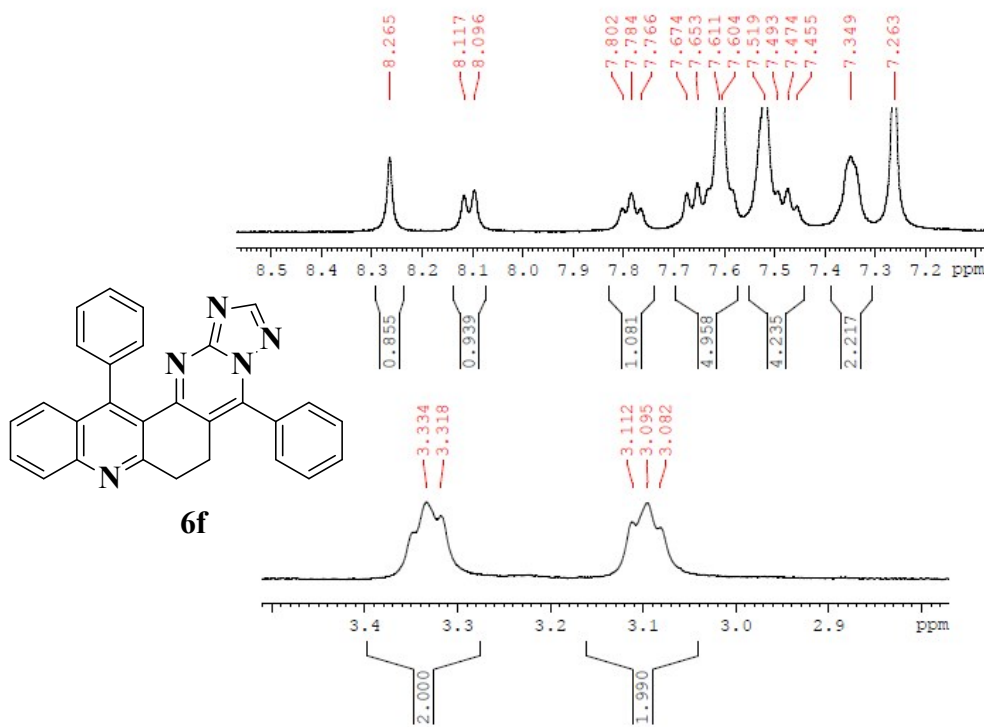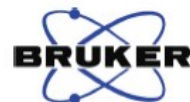

Current Data Parameters  
 NAME MOD40114  
 EXPNO 13  
 PROCNO 1

F2 - Acquisition Parameters  
 Date\_ 20140127  
 Time 18.22  
 INSTRUM spect  
 PROBHD 5 mm PABBO BB/  
 PULPROG zg30  
 TD 65536  
 SOLVENT CDCl3  
 NS 16  
 DS 2  
 SWH 8223.685 Hz  
 FIDRES 0.125493 Hz  
 AQ 3.9945889 sec  
 RG 199.6  
 DW 60.800 usec  
 DE 6.50 usec  
 TE 295.9 K  
 DL 1.00000000 sec  
 TDO 1

===== CHANNEL f1 =====  
 NUC1 1H  
 P1 14.25 usec  
 PLW1 14.00000000 W  
 SFO1 400.2604718 MHz

F2 - Processing parameters  
 SI 65536  
 SF 400.2604718 MHz  
 WDW EM  
 SSB 0  
 GB 0 0.30 Hz  
 PC 1.00

# <sup>13</sup>C NMR spectrum of compound (6f):

JPR-064-p

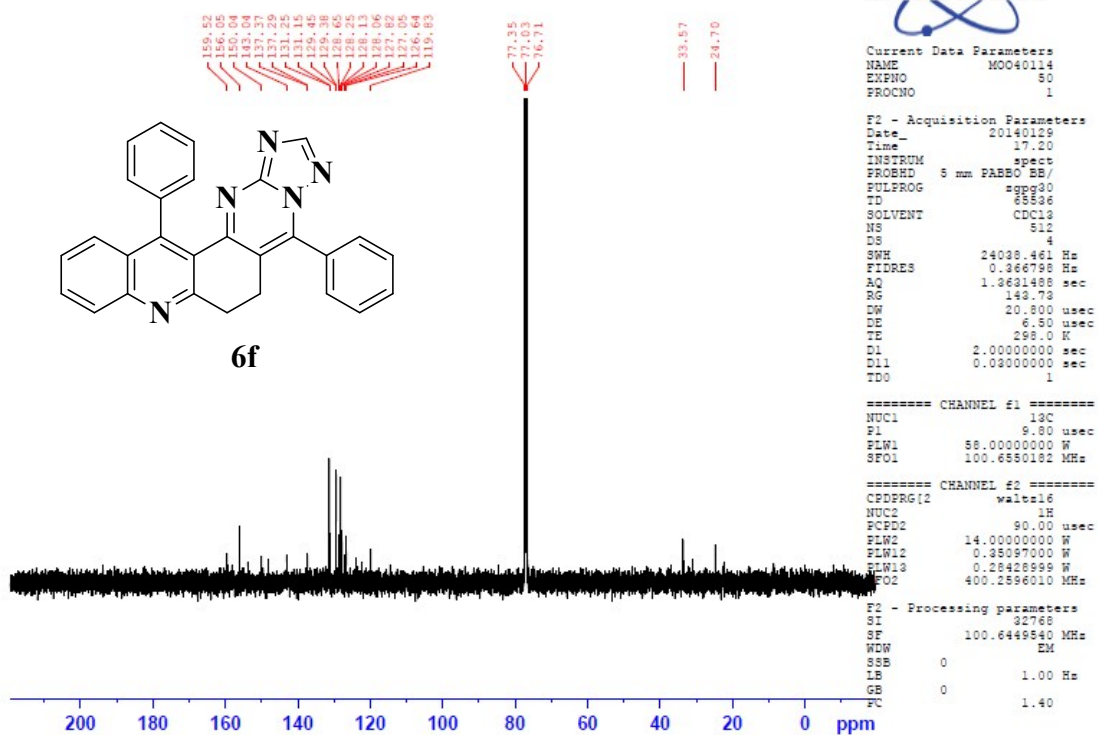

# HRMS spectrum of compound (6f):

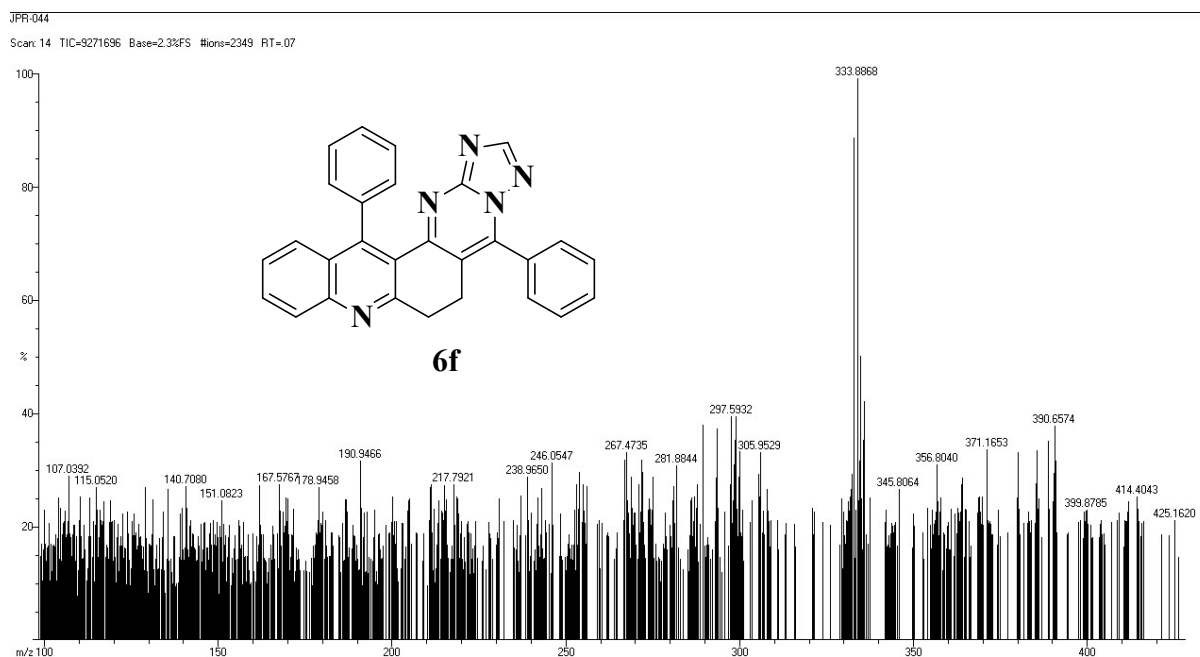

# <sup>1</sup>H NMR spectrum of compound (6g):

Signature SIF VIT VELLORE  
JPR-271-P

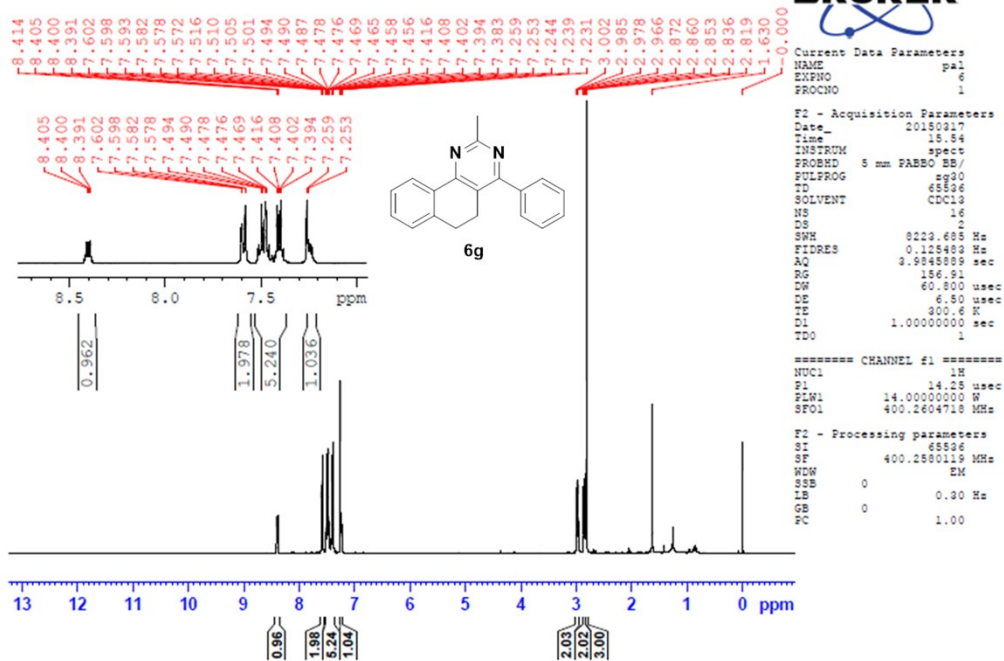

# <sup>13</sup>C NMR spectrum of compound (6g):

Signature SIF VIT VELLORE  
JPR-271-P

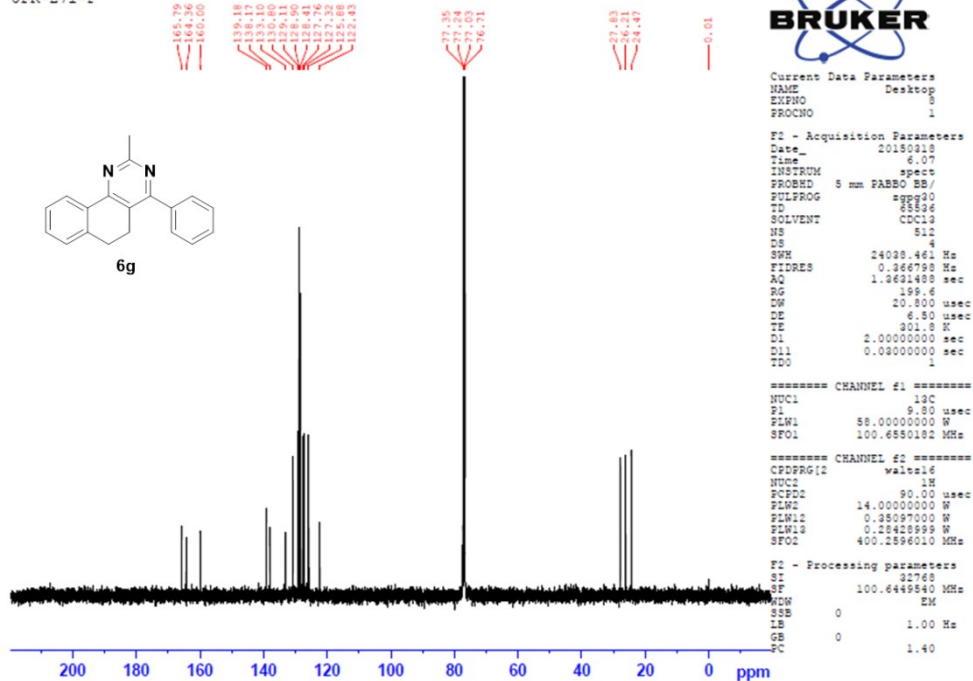

Supplement: c5ra00229j1.pdf [file c5ra00229j1.pdf]
